# Supplementary material
Source: publisher figshare collection journal article supplement (https://acs.figshare.com/ndownloader/files/4508149)
Supplement: Supplementary file 1 [file 4508149]

data_x
#data_CuInSe2_Cu3P MSP 300_publ

_pd_block_id
  2009-07-09T14:39|CUINSE2MSP300|CuInSe2MSP300Cu3P|Overall

_audit_creation_method  "from EXP file using GSAS2CIF"
_audit_creation_date                   2009-07-09T14:39
_audit_author_name                     CuInSe2MSP300Cu3P
_audit_update_record
; 2009-07-09T14:39  Initial CIF as created by GSAS2CIF
;

#=============================================================================
# this information describes the project, paper etc. for the CIF             #
# Acta Cryst. Section C papers and editorial correspondence is generated     #
# from the information in this section                                       #
#                                                                            #
#   (from)   CIF submission form for Rietveld refinements (Acta Cryst. C)    #
#                                                 Version 14 December 1998   #
#=============================================================================
# 1. SUBMISSION DETAILS

_publ_contact_author_name            ?   # Name of author for correspondence
_publ_contact_author_address             # Address of author for correspondence
; ?
;
_publ_contact_author_email           ?
_publ_contact_author_fax             ?
_publ_contact_author_phone           ?

_publ_contact_letter
; ?
;

_publ_requested_journal              ?
_publ_requested_coeditor_name        ?
_publ_requested_category             ?   # Acta C: one of CI/CM/CO/FI/FM/FO

#==============================================================================

# 2. PROCESSING SUMMARY (IUCr Office Use Only)

_journal_data_validation_number      ?

_journal_date_recd_electronic        ?
_journal_date_to_coeditor            ?
_journal_date_from_coeditor          ?
_journal_date_accepted               ?
_journal_date_printers_first         ?
_journal_date_printers_final         ?
_journal_date_proofs_out             ?
_journal_date_proofs_in              ?
_journal_coeditor_name               ?
_journal_coeditor_code               ?
_journal_coeditor_notes
; ?
;
_journal_techeditor_code             ?
_journal_techeditor_notes
; ?
;
_journal_coden_ASTM                  ?
_journal_name_full                   ?
_journal_year                        ?
_journal_volume                      ?
_journal_issue                       ?
_journal_page_first                  ?
_journal_page_last                   ?
_journal_paper_category              ?
_journal_suppl_publ_number           ?
_journal_suppl_publ_pages            ?

#==============================================================================

# 3. TITLE AND AUTHOR LIST

_publ_section_title
; ?
;
_publ_section_title_footnote
; ?
;

# The loop structure below should contain the names and addresses of all
# authors, in the required order of publication. Repeat as necessary.

loop_
	_publ_author_name
        _publ_author_footnote
	_publ_author_address
 ?                                   #<--'Last name, first name'
; ?
;
; ?
;

#==============================================================================

# 4. TEXT

_publ_section_synopsis
;  ?
;
_publ_section_abstract
; ?
;
_publ_section_comment
; ?
;
_publ_section_exptl_prep      # Details of the preparation of the sample(s)
                              # should be given here.
; ?
;
_publ_section_exptl_refinement
; ?
;
_publ_section_references
; ?
;
_publ_section_figure_captions
; ?
;
_publ_section_acknowledgements
; ?
;

#=============================================================================
# 5. OVERALL REFINEMENT & COMPUTING DETAILS

_refine_special_details
; ?
;
_pd_proc_ls_special_details
; ?
;

# The following items are used to identify the programs used.
_computing_molecular_graphics     ?
_computing_publication_material   ?

_refine_ls_weighting_scheme       ?
_refine_ls_weighting_details      ?
_refine_ls_hydrogen_treatment     ?
_refine_ls_extinction_method      ?
_refine_ls_extinction_coef        ?
_refine_ls_number_constraints     ?

_refine_ls_restrained_S_all       ?
_refine_ls_restrained_S_obs       ?

#==============================================================================
# 6. SAMPLE PREPARATION DATA

# (In the unusual case where multiple samples are used in a single
#  Rietveld study, this information should be moved into the phase
#  blocks)

# The following three fields describe the preparation of the material.
# The cooling rate is in K/min.  The pressure at which the sample was
# prepared is in kPa.  The temperature of preparation is in K.

_pd_prep_cool_rate                ?
_pd_prep_pressure                 ?
_pd_prep_temperature              ?

_pd_char_colour                   ?       # use ICDD colour descriptions
data_CUINSE2MSP300_overall

_refine_ls_shift/su_max                0.01
_refine_ls_shift/su_mean               0.01
_computing_structure_refinement        GSAS
_refine_ls_number_parameters           12
_refine_ls_goodness_of_fit_all         25.52
_refine_ls_number_restraints           0
_refine_ls_matrix_type                 full

# pointers to the phase blocks
loop_   _pd_phase_block_id
      2009-07-09T14:39|CUINSE2MSP300_phase1|CuInSe2MSP300Cu3P||
      2009-07-09T14:39|CUINSE2MSP300_phase2|CuInSe2MSP300Cu3P||
# pointers to the diffraction patterns
loop_   _pd_block_diffractogram_id
      2009-07-09T14:39|CUINSE2MSP300_H_01|CuInSe2MSP300Cu3P|Ultima_III

# Information for phase 1
data_CUINSE2MSP300_phase_1

_pd_block_id
  2009-07-09T14:39|CUINSE2MSP300_phase1|CuInSe2MSP300Cu3P||

# Histograms for phase 1
loop_   _pd_block_diffractogram_id
  2009-07-09T14:39|CUINSE2MSP300_H_01|CuInSe2MSP300Cu3P|Ultima_III

#==============================================================================
# 7. CHEMICAL, STRUCTURAL AND CRYSTAL DATA

_pd_char_particle_morphology      ?

_chemical_name_systematic
; ?
;
_chemical_name_common             ?
_chemical_formula_moiety          ?
_chemical_formula_structural      ?
_chemical_formula_analytical      ?
_chemical_melting_point           ?
_chemical_compound_source         ?       # for minerals and
                                          # natural products
_symmetry_space_group_name_Hall   ?

_exptl_crystal_F_000               ?
_exptl_crystal_density_diffrn      ?
_exptl_crystal_density_meas        ?
_exptl_crystal_density_method      ?

_cell_measurement_temperature     ?

_cell_special_details
; ?
;

_geom_special_details             ?

# The following item identifies the program(s) used (if appropriate).
_computing_structure_solution     ?

#==============================================================================

# 8. Phase information from GSAS

_pd_phase_name                         "from E:/Powder/Compounds/CUINSE2.cel"
_cell_length_a                         5.7817(32)
_cell_length_b                         5.7817
_cell_length_c                         11.601(13)
_cell_angle_alpha                      90.0
_cell_angle_beta                       90.0
_cell_angle_gamma                      90.0
_cell_volume                           387.80(29)
_symmetry_cell_setting                 tetragonal
_symmetry_space_group_name_H-M         "I -4 2 d"
loop_ _symmetry_equiv_pos_site_id _symmetry_equiv_pos_as_xyz
       1 +x,+y,+z 
       2 +y,-x,-z 
       3 -x,-y,+z 
       4 -y,+x,-z 
       5 -x+1/2,+y,-z+3/4 
       6 +y,+x+1/2,+z+1/4 
       7 +x+1/2,-y,-z+3/4 
       8 -y,-x+1/2,+z+1/4 
     101 +x+1/2,+y+1/2,+z+1/2 
     102 +y+1/2,-x+1/2,-z+1/2 
     103 -x+1/2,-y+1/2,+z+1/2 
     104 -y+1/2,+x+1/2,-z+1/2 
     105 -x,+y+1/2,-z+1/4 
     106 +y+1/2,+x,+z+3/4 
     107 +x,-y+1/2,-z+1/4 
     108 -y+1/2,-x,+z+3/4 

# ATOMIC COORDINATES AND DISPLACEMENT PARAMETERS


loop_
      _atom_site_type_symbol
      _atom_site_label
      _atom_site_fract_x
      _atom_site_fract_y
      _atom_site_fract_z
      _atom_site_occupancy
      _atom_site_thermal_displace_type
      _atom_site_U_iso_or_equiv
      _atom_site_symmetry_multiplicity
Cu
Cu      0.0          0.0          0.0          1.0        Uiso   0.025         4
In
In      0.0          0.0          0.5          1.0        Uiso   0.025         4
Se
Se      0.242        0.25         0.125        1.0        Uiso   0.025         8

loop_ _atom_type_symbol
      _atom_type_number_in_cell
                   Cu  4.0        
                   In  4.0        
                   Se  8.0        
 
# If you change Z, be sure to change all 3 of the following
_chemical_formula_sum                  "Cu In Se2"
_chemical_formula_weight               336.29
_cell_formula_units_Z                  4

# MOLECULAR GEOMETRY

loop_
      _geom_bond_atom_site_label_1
      _geom_bond_atom_site_label_2
      _geom_bond_distance
      _geom_bond_site_symmetry_1
      _geom_bond_site_symmetry_2
      _geom_bond_publ_flag
  Cu        Se              2.4799(13)  .      1_555  N
  Cu        Se              2.4799(13)  .      2_555  N
  Cu        Se              2.4799(13)  .      3_555  N
  Cu        Se              2.4799(13)  .      4_555  N
  In        Se              2.5332(14)  .      5_555  N
  In        Se              2.5332(14)  .      6_545  N
  In        Se              2.5332(14)  .      7_455  N
  In        Se              2.5332(14)  .      8_555  N
  Se        Cu              2.4799(13)  .      1_555  N
  Se        Cu              2.4799(13)  .      6_555  N
  Se        In              2.5332(14)  .      5_555  N
  Se        In              2.5332(14)  .    101_554  N

loop_
      _geom_angle_atom_site_label_1
      _geom_angle_atom_site_label_2
      _geom_angle_atom_site_label_3
      _geom_angle
      _geom_angle_site_symmetry_1
      _geom_angle_site_symmetry_2
      _geom_angle_site_symmetry_3
      _geom_angle_publ_flag
  Se        Cu        Se               109.99(4)      1_555  .      2_555  N
  Se        Cu        Se               108.43(7)      1_555  .      3_555  N
  Se        Cu        Se               109.99(4)      1_555  .      4_555  N
  Se        Cu        Se               109.99(4)      2_555  .      3_555  N
  Se        Cu        Se               108.43(7)      2_555  .      4_555  N
  Se        Cu        Se               109.99(4)      3_555  .      4_555  N
  Se        In        Se             109.128(34)      5_555  .      6_545  N
  Se        In        Se               110.16(7)      5_555  .      7_455  N
  Se        In        Se             109.128(34)      5_555  .      8_555  N
  Se        In        Se             109.128(34)      6_545  .      7_455  N
  Se        In        Se               110.16(7)      6_545  .      8_555  N
  Se        In        Se             109.128(34)      7_455  .      8_555  N
  Cu        Se        Cu             111.305(34)      1_555  .      6_555  N
  Cu        Se        In             109.535(35)      1_555  .      5_555  N
  Cu        Se        In               109.27(7)      1_555  .    101_554  N
  Cu        Se        In               109.27(7)      6_555  .      5_555  N
  Cu        Se        In             109.535(35)      6_555  .    101_554  N
  In        Se        In               107.85(4)      5_555  .    101_554  N

# Information for phase 2
data_CUINSE2MSP300_phase_2

_pd_block_id
  2009-07-09T14:39|CUINSE2MSP300_phase2|CuInSe2MSP300Cu3P||

# Histograms for phase 2
loop_   _pd_block_diffractogram_id
  2009-07-09T14:39|CUINSE2MSP300_H_01|CuInSe2MSP300Cu3P|Ultima_III

#==============================================================================
# 7. CHEMICAL, STRUCTURAL AND CRYSTAL DATA

_pd_char_particle_morphology      ?

_chemical_name_systematic
; ?
;
_chemical_name_common             ?
_chemical_formula_moiety          ?
_chemical_formula_structural      ?
_chemical_formula_analytical      ?
_chemical_melting_point           ?
_chemical_compound_source         ?       # for minerals and
                                          # natural products
_symmetry_space_group_name_Hall   ?

_exptl_crystal_F_000               ?
_exptl_crystal_density_diffrn      ?
_exptl_crystal_density_meas        ?
_exptl_crystal_density_method      ?

_cell_measurement_temperature     ?

_cell_special_details
; ?
;

_geom_special_details             ?

# The following item identifies the program(s) used (if appropriate).
_computing_structure_solution     ?

#==============================================================================

# 8. Phase information from GSAS

_pd_phase_name                         "from E:/Powder/Compounds/CU3P.cel"
_cell_length_a                         6.9986(4)
_cell_length_b                         6.9986
_cell_length_c                         7.1357(6)
_cell_angle_alpha                      90.0
_cell_angle_beta                       90.0
_cell_angle_gamma                      120.0
_cell_volume                           302.686(30)
_symmetry_cell_setting                 hexagonal
_symmetry_space_group_name_H-M         "P 63 c m"
loop_ _symmetry_equiv_pos_site_id _symmetry_equiv_pos_as_xyz
       1 +x,+y,+z 
       2 x-y,+x,+z+1/2 
       3 -y,x-y,+z 
       4 -x,-y,+z+1/2 
       5 y-x,-x,+z 
       6 +y,y-x,+z+1/2 
       7 y-x,+y,+z+1/2 
       8 -x,y-x,+z 
       9 -y,-x,+z+1/2 
      10 x-y,-y,+z 
      11 +x,x-y,+z+1/2 
      12 +y,+x,+z 

# ATOMIC COORDINATES AND DISPLACEMENT PARAMETERS


loop_
      _atom_site_type_symbol
      _atom_site_label
      _atom_site_fract_x
      _atom_site_fract_y
      _atom_site_fract_z
      _atom_site_occupancy
      _atom_site_thermal_displace_type
      _atom_site_U_iso_or_equiv
      _atom_site_symmetry_multiplicity
Cu
Cu      0.7194       0.0          0.5765       1.0        Uiso   0.025         6
Cu
Cu      0.6239       0.0          0.9246       1.0        Uiso   0.025         6
Cu
Cu      0.3333       0.6667       0.6998       1.0        Uiso   0.025         4
Cu
Cu      0.0          0.0          0.8213       1.0        Uiso   0.025         2
P 
P       0.6678       0.0          0.25         1.0        Uiso   0.025         6

loop_ _atom_type_symbol
      _atom_type_number_in_cell
                   Cu 18.0        
                   P   6.0        
 
# If you change Z, be sure to change all 3 of the following
_chemical_formula_sum                  "Cu3 P"
_chemical_formula_weight               221.61
_cell_formula_units_Z                  6

# MOLECULAR GEOMETRY

loop_
      _geom_bond_atom_site_label_1
      _geom_bond_atom_site_label_2
      _geom_bond_distance
      _geom_bond_site_symmetry_1
      _geom_bond_site_symmetry_2
      _geom_bond_publ_flag
  Cu        Cu             2.57230(21)  .      1_555  N
  Cu        Cu             2.60589(13)  .      2_544  N
  Cu        Cu             2.63580(13)  .      4_654  N
  Cu        Cu             2.60589(13)  .      6_664  N
  Cu        Cu             2.68585(14)  .      1_545  N
  Cu        Cu             2.68611(14)  .      8_655  N
  Cu        Cu             2.62830(13)  .      1_655  N
  Cu        Cu             2.67820(14)  .      2_654  N
  Cu        P              2.35764(20)  .      1_555  N
  Cu        P              2.49578(12)  .      2_545  N
  Cu        P              2.49578(12)  .      6_665  N
  Cu        Cu             2.57230(21)  .      1_555  N
  Cu        Cu             2.60589(13)  .      2_545  N
  Cu        Cu             2.63580(13)  .      4_655  N
  Cu        Cu             2.60589(13)  .      6_665  N
  Cu        Cu             2.72150(13)  .      1_545  N
  Cu        Cu             2.94784(15)  .      2_655  N
  Cu        Cu             2.94763(15)  .      7_545  N
  Cu        Cu             2.72184(13)  .      8_655  N
  Cu        Cu             2.73344(15)  .      1_655  N
  Cu        P              2.34221(20)  .      1_556  N
  Cu        P              2.78681(14)  .      2_545  N
  Cu        P              2.39164(12)  .      4_655  N
  Cu        P              2.78681(14)  .      6_665  N
  Cu        Cu             2.68585(14)  .      1_565  N
  Cu        Cu             2.68545(14)  .      3_555  N
  Cu        Cu             2.68611(14)  .      5_665  N
  Cu        Cu             2.72150(13)  .      1_565  N
  Cu        Cu             2.94815(15)  .      2_554  N
  Cu        Cu             2.72128(13)  .      3_555  N
  Cu        Cu             2.94763(15)  .      4_664  N
  Cu        Cu             2.72184(13)  .      5_665  N
  Cu        Cu             2.94784(15)  .      6_564  N
  Cu        P              2.36448(13)  .      2_555  N
  Cu        P              2.36379(13)  .      4_665  N
  Cu        P              2.36414(13)  .      6_565  N
  Cu        Cu             2.62830(13)  .      1_455  N
  Cu        Cu             2.67820(14)  .      2_445  N
  Cu        Cu             2.62830(13)  .      3_545  N
  Cu        Cu             2.67820(14)  .      4_655  N
  Cu        Cu             2.62830(13)  .      5_665  N
  Cu        Cu             2.67820(14)  .      6_565  N
  Cu        Cu             2.73344(15)  .      1_455  N
  Cu        Cu             2.73344(15)  .      3_545  N
  Cu        Cu             2.73344(15)  .      5_665  N
  Cu        P              2.37995(13)  .      2_445  N
  Cu        P              2.37995(13)  .      4_655  N
  Cu        P              2.37995(13)  .      6_565  N
  P         Cu             2.35764(20)  .      1_555  N
  P         Cu             2.49578(12)  .      2_544  N
  P         Cu             2.49578(12)  .      6_664  N
  P         Cu             2.34221(20)  .      1_554  N
  P         Cu             2.78681(14)  .      2_544  N
  P         Cu             2.39164(12)  .      4_654  N
  P         Cu             2.78681(14)  .      6_664  N
  P         Cu             2.36414(13)  .      2_654  N
  P         Cu             2.36379(13)  .      7_544  N
  P         Cu             2.37995(13)  .      2_654  N

loop_
      _geom_angle_atom_site_label_1
      _geom_angle_atom_site_label_2
      _geom_angle_atom_site_label_3
      _geom_angle
      _geom_angle_site_symmetry_1
      _geom_angle_site_symmetry_2
      _geom_angle_site_symmetry_3
      _geom_angle_publ_flag
  P         Cu        P             122.6418(23)      1_555  .      2_545  N
  P         Cu        P             122.6418(23)      1_555  .      6_665  N
  P         Cu        P               107.558(4)      2_545  .      6_665  N
  P         Cu        P             128.9328(19)      1_556  .      4_655  N
  P         Cu        P              117.7467(5)      2_555  .      4_665  N
  P         Cu        P              117.7327(5)      2_555  .      6_565  N
  P         Cu        P              117.7605(5)      4_665  .      6_565  N
  P         Cu        P              115.5595(9)      2_445  .      4_655  N
  P         Cu        P              115.5596(9)      2_445  .      6_565  N
  P         Cu        P              115.5596(9)      4_655  .      6_565  N
  Cu        P         Cu            114.0654(32)      1_555  .      2_544  N
  Cu        P         Cu            114.0654(32)      1_555  .      6_664  N
  Cu        P         Cu           178.72630(10)      1_555  .      1_554  N
  Cu        P         Cu               67.416(4)      1_555  .      4_654  N
  Cu        P         Cu             103.0524(5)      1_555  .      2_654  N
  Cu        P         Cu             103.0517(5)      1_555  .      7_544  N
  Cu        P         Cu            68.84540(30)      1_555  .      2_654  N
  Cu        P         Cu             85.9115(28)      2_544  .      6_664  N
  Cu        P         Cu             65.0906(31)      2_544  .      1_554  N
  Cu        P         Cu            135.8693(13)      2_544  .      4_654  N
  Cu        P         Cu            140.7595(34)      2_544  .      2_654  N
  Cu        P         Cu            67.02890(30)      2_544  .      7_544  N
  Cu        P         Cu             65.1884(22)      2_544  .      2_654  N
  Cu        P         Cu             65.0906(31)      6_664  .      1_554  N
  Cu        P         Cu            135.8693(13)      6_664  .      4_654  N
  Cu        P         Cu            67.04240(30)      6_664  .      2_654  N
  Cu        P         Cu            140.7554(34)      6_664  .      7_544  N
  Cu        P         Cu             65.1884(22)      6_664  .      2_654  N
  Cu        P         Cu            113.8578(35)      1_554  .      4_654  N
  Cu        P         Cu              77.5616(5)      1_554  .      2_654  N
  Cu        P         Cu              77.5620(5)      1_554  .      7_544  N
  Cu        P         Cu             109.8812(5)      1_554  .      2_654  N
  Cu        P         Cu             69.8055(17)      4_654  .      2_654  N
  Cu        P         Cu             69.8178(17)      4_654  .      7_544  N
  Cu        P         Cu              136.261(4)      4_654  .      2_654  N
  Cu        P         Cu             117.4194(5)      2_654  .      7_544  N
  Cu        P         Cu           121.18430(20)      2_654  .      2_654  N
  Cu        P         Cu           121.17010(20)      7_544  .      2_654  N

# Powder diffraction data for histogram  1
data_CUINSE2MSP300_p_01

_pd_block_id
  2009-07-09T14:39|CUINSE2MSP300_H_01|CuInSe2MSP300Cu3P|Ultima_III
#==============================================================================
# 9. INSTRUMENT CHARACTERIZATION

_exptl_special_details
; ?
;

# if regions of the data are excluded, the reason(s) are supplied here:
_pd_proc_info_excluded_regions
; ?
;

# The following item is used to identify the equipment used to record
# the powder pattern when the diffractogram was measured at a laboratory
# other than the authors' home institution, e.g. when neutron or synchrotron
# radiation is used.

_pd_instr_location
; ?
;
_pd_calibration_special_details           # description of the method used
                                          # to calibrate the instrument
; ?
;

_diffrn_ambient_temperature       ?
_diffrn_source                    ?
_diffrn_source_target             ?
_diffrn_source_type               ?
_diffrn_measurement_device_type   ?
_diffrn_detector                  ?
_diffrn_detector_type             ?       # make or model of detector

_pd_meas_scan_method              ?       # options are 'step', 'cont',
                                          # 'tof', 'fixed' or
                                          # 'disp' (= dispersive)
_pd_meas_special_details
;  ?
;

# The following two items identify the program(s) used (if appropriate).
_computing_data_collection        ?
_computing_data_reduction         ?

# Describe any processing performed on the data, prior to refinement.
# For example: a manual Lp correction or a precomputed absorption correction
_pd_proc_info_data_reduction      ?

# The following item is used for angular dispersive measurements only.

_diffrn_radiation_monochromator   ?

# The following items are used to define the size of the instrument.
# Not all distances are appropriate for all instrument types.

_pd_instr_dist_src/mono           ?
_pd_instr_dist_mono/spec          ?
_pd_instr_dist_src/spec           ?
_pd_instr_dist_spec/anal          ?
_pd_instr_dist_anal/detc          ?
_pd_instr_dist_spec/detc          ?

# 10. Specimen size and mounting information

# The next three fields give the specimen dimensions in mm.  The equatorial
# plane contains the incident and diffracted beam.

_pd_spec_size_axial               ?       # perpendicular to
                                          # equatorial plane

_pd_spec_size_equat               ?       # parallel to
                                          # scattering vector
                                          # in transmission

_pd_spec_size_thick               ?       # parallel to
                                          # scattering vector
                                          # in reflection

_pd_spec_mounting                         # This field should be
                                          # used to give details of the
                                          # container.
; ?
;

_pd_spec_mount_mode               ?       # options are 'reflection'
                                          # or 'transmission'

_pd_spec_shape                    ?       # options are 'cylinder'
                                          # 'flat_sheet' or 'irregular'

# phase table
loop_     _pd_phase_id
          _pd_phase_block_id
          _pd_phase_mass_%
          _pd_proc_ls_profile_function
          _pd_proc_ls_peak_cutoff
  1  2009-07-09T14:39|CUINSE2MSP300_phase1|CuInSe2MSP300Cu3P||
          ?
;
 CW Profile function number 2 with  18 terms
 Profile coefficients for Simpson's rule integration of pseudovoigt function
 C.J. Howard (1982). J. Appl. Cryst.,15,615-620.
 P. Thompson, D.E. Cox & J.B. Hastings (1987). J. Appl. Cryst.,20,79-83.
 #1(GU)   =    2.400 #2(GV)   = -266.064 #3(GW)   =  395.201
 #4(LX)   =    3.617 #5(LY)   =    6.297 #6(trns) =    0.000
 #7(asym) =   0.0000 #8(shft) =   9.7307 #9(GP)   =    0.000
 #10(stec)=     0.00 #11(ptec)=     0.00 #12(sfec)=     0.00
 #13(L11) =    0.000 #14(L22) =    0.000 #15(L33) =    0.000
 #16(L12) =    0.000 #17(L13) =    0.000 #18(L23) =    0.000
 Peak tails are ignored  where the intensity is below 0.0100 times the peak
   Aniso. broadening axis   0.0   0.0   1.0
;
           0.01000
  2  2009-07-09T14:39|CUINSE2MSP300_phase2|CuInSe2MSP300Cu3P||
          ?
;
 CW Profile function number 2 with  18 terms
 Profile coefficients for Simpson's rule integration of pseudovoigt function
 C.J. Howard (1982). J. Appl. Cryst.,15,615-620.
 P. Thompson, D.E. Cox & J.B. Hastings (1987). J. Appl. Cryst.,20,79-83.
 #1(GU)   =    2.400 #2(GV)   =   -5.500 #3(GW)   =    6.000
 #4(LX)   =    3.617 #5(LY)   =    6.297 #6(trns) =    0.000
 #7(asym) =   0.0000 #8(shft) =   8.0634 #9(GP)   =    0.000
 #10(stec)=     0.00 #11(ptec)=     0.00 #12(sfec)=     0.00
 #13(L11) =    0.000 #14(L22) =    0.000 #15(L33) =    0.000
 #16(L12) =    0.000 #17(L13) =    0.000 #18(L23) =    0.000
 Peak tails are ignored  where the intensity is below 0.0100 times the peak
   Aniso. broadening axis   0.0   0.0   1.0
;
           0.01000

loop_ _atom_type_symbol
      _atom_type_scat_dispersion_real
      _atom_type_scat_dispersion_imag
      _atom_type_scat_Cromer_Mann_a1
      _atom_type_scat_Cromer_Mann_a2
      _atom_type_scat_Cromer_Mann_a3
      _atom_type_scat_Cromer_Mann_a4
      _atom_type_scat_Cromer_Mann_b1
      _atom_type_scat_Cromer_Mann_b2
      _atom_type_scat_Cromer_Mann_b3
      _atom_type_scat_Cromer_Mann_b4
      _atom_type_scat_Cromer_Mann_c
      _atom_type_scat_source
  Cu    0.000    0.000
 13.3380 3.58280 7.16760 0.24700 5.61580 11.3966 1.67350 64.8126 1.19100 
  International_Tables_Vol_C
  In    0.000    0.000
 19.1624 0.54760 18.5596 6.37760 4.29480 25.8499 2.03960 92.8029 4.93910 
  International_Tables_Vol_C
  Se    0.000    0.000
 17.0006 2.40980 5.81960 0.27260 3.97310 15.2372 4.35430 43.8163 2.84090 
  International_Tables_Vol_C
  P    0.000    0.000
 6.43450 1.90670 4.17910 27.1570 1.78000 0.52600 1.49080 68.1645 1.11490 
  International_Tables_Vol_C
_diffrn_radiation_probe                x-ray
_diffrn_radiation_polarisn_ratio       0.5

loop_
      _diffrn_radiation_wavelength
      _diffrn_radiation_wavelength_wt
      _diffrn_radiation_type
      _diffrn_radiation_wavelength_id
                      1.540510      1.000   K\a~1~  1
                      1.544330      0.500   K\a~2~  2
_pd_proc_ls_prof_R_factor              0.0854
_pd_proc_ls_prof_wR_factor             0.1354
_pd_proc_ls_prof_wR_expected           0.0268
_refine_ls_R_Fsqd_factor               0.47963

_pd_proc_ls_background_function
;   GSAS Background function number 2 with  6 terms.
 Cosine Fourier series
      1:   -4212.42     2:    9439.92     3:   -5968.84     4:    2567.97    
      5:   -780.351     6:   -119.797    
;

_exptl_absorpt_process_details
;   GSAS Absorption/surface roughness correction: function number 0
 No correction is applied.
;
_exptl_absorpt_correction_T_min        1.00000
_exptl_absorpt_correction_T_max        1.00000
# Extinction correction
_gsas_exptl_extinct_corr_T_min         1.00000
_gsas_exptl_extinct_corr_T_max         1.00000
_pd_proc_info_datetime                 2009-07-09T14:39:03
_pd_calc_method                        "Rietveld Refinement"

#---- raw/calc data loop -----
_pd_meas_2theta_range_min              10.02
_pd_meas_2theta_range_max              90.0
_pd_meas_2theta_range_inc              0.02
_pd_proc_2theta_range_min              10.02
_pd_proc_2theta_range_max              90.0
_pd_proc_2theta_range_inc              0.02

loop_
      _pd_meas_counts_total
      _pd_proc_ls_weight
      _pd_proc_intensity_bkg_calc
      _pd_calc_intensity_total
  1165.0    0.000858    1024.72009   1024.69617
  1094.0    0.000914    1025.09009   1025.06628
  1112.0    0.000899    1025.46045   1025.43677
  1092.0    0.000916    1025.83215   1025.80798
  1130.0    0.000885    1026.20288   1026.17896
  1075.0    0.000930    1026.57471   1026.55127
  1099.0    0.000910    1026.94763   1026.92383
  1117.0    0.000895    1027.32031   1027.29663
  1173.0    0.000853    1027.69446   1027.67090
  1166.0    0.000858    1028.06873   1028.04529
  1149.0    0.000870    1028.44373   1028.42017
  1087.0    0.000920    1028.81860   1028.79541
  1138.0    0.000879    1029.19482   1029.17126
  1122.0    0.000891    1029.57166   1029.54797
  1104.0    0.000906    1029.94824   1029.92517
  1106.0    0.000904    1030.32642   1030.30286
  1160.0    0.000862    1030.70422   1030.68091
  1116.0    0.000896    1031.08215   1031.05933
  1085.0    0.000922    1031.46167   1031.43835
  1152.0    0.000868    1031.84167   1031.81848
  1114.0    0.000898    1032.22217   1032.19910
  1177.0    0.000850    1032.60254   1032.57996
  1178.0    0.000849    1032.98352   1032.96094
  1120.0    0.000893    1033.36572   1033.34314
  1155.0    0.000866    1033.74866   1033.72571
  1156.0    0.000865    1034.13135   1034.10901
  1114.0    0.000898    1034.51465   1034.49219
  1111.0    0.000900    1034.89868   1034.87573
  1087.0    0.000920    1035.28333   1035.26086
  1060.0    0.000943    1035.66846   1035.64624
  1120.0    0.000893    1036.05396   1036.03186
  1137.0    0.000880    1036.44031   1036.41797
  1120.0    0.000893    1036.82727   1036.80505
  1170.0    0.000855    1037.21411   1037.19165
  1088.0    0.000919    1037.60193   1037.57959
  1172.0    0.000853    1037.99036   1037.96814
  1128.0    0.000887    1038.37891   1038.35657
  1144.0    0.000874    1038.76855   1038.74634
  1096.0    0.000912    1039.15833   1039.13647
  1148.0    0.000871    1039.54846   1039.52673
  1138.0    0.000879    1039.93933   1039.91797
  1135.0    0.000881    1040.33130   1040.30933
  1142.0    0.000876    1040.72253   1040.70068
  1137.0    0.000880    1041.11560   1041.09375
  1173.0    0.000853    1041.50806   1041.48657
  1143.0    0.000875    1041.90149   1041.87988
  1151.0    0.000869    1042.29565   1042.27405
  1123.0    0.000890    1042.69031   1042.66858
  1105.0    0.000905    1043.08533   1043.06421
  1117.0    0.000895    1043.48047   1043.45935
  1117.0    0.000895    1043.87720   1043.85608
  1107.0    0.000903    1044.27332   1044.25195
  1170.0    0.000855    1044.67029   1044.64905
  1112.0    0.000899    1045.06726   1045.04639
  1159.0    0.000863    1045.46594   1045.44482
  1174.0    0.000852    1045.86450   1045.84351
  1116.0    0.000896    1046.26355   1046.24231
  1186.0    0.000843    1046.66333   1046.64258
  1128.0    0.000887    1047.06299   1047.04260
  1147.0    0.000872    1047.46387   1047.44336
  1057.0    0.000946    1047.86511   1047.84448
  1100.0    0.000909    1048.26648   1048.24585
  1141.0    0.000876    1048.66858   1048.64832
  1162.0    0.000861    1049.07080   1049.04993
  1082.0    0.000924    1049.47424   1049.45386
  1080.0    0.000926    1049.87769   1049.85754
  1125.0    0.000889    1050.28198   1050.26172
  1128.0    0.000887    1050.68604   1050.66577
  1151.0    0.000869    1051.09143   1051.07153
  1105.0    0.000905    1051.49683   1051.47681
  1112.0    0.000899    1051.90295   1051.88281
  1127.0    0.000887    1052.30920   1052.28943
  1113.0    0.000898    1052.71655   1052.69653
  1174.0    0.000852    1053.12354   1053.10388
  1093.0    0.000915    1053.53149   1053.51184
  1078.0    0.000928    1053.94055   1053.92065
  1109.0    0.000902    1054.34888   1054.32922
  1128.0    0.000887    1054.75891   1054.73926
  1078.0    0.000928    1055.16833   1055.14880
  1120.0    0.000893    1055.57910   1055.55957
  1127.0    0.000887    1055.98975   1055.97034
  1080.0    0.000926    1056.40051   1056.38098
  1180.0    0.000847    1056.81274   1056.79358
  1080.0    0.000926    1057.22510   1057.20593
  1060.0    0.000943    1057.63794   1057.61841
  1105.0    0.000905    1058.05115   1058.03198
  1104.0    0.000906    1058.46436   1058.44543
  1169.0    0.000855    1058.87891   1058.85986
  1101.0    0.000908    1059.29321   1059.27393
  1056.0    0.000947    1059.70898   1059.69006
  1062.0    0.000942    1060.12378   1060.10510
  1060.0    0.000943    1060.53979   1060.52100
  1144.0    0.000874    1060.95679   1060.93823
  1145.0    0.000873    1061.37317   1061.35474
  1070.0    0.000935    1061.79138   1061.77222
  1120.0    0.000893    1062.20825   1062.18994
  1059.0    0.000944    1062.62659   1062.60815
  1088.0    0.000919    1063.04553   1063.02734
  1082.0    0.000924    1063.46484   1063.44629
  1112.0    0.000899    1063.88501   1063.86694
  1032.0    0.000969    1064.30457   1064.28662
  1085.0    0.000922    1064.72498   1064.70679
  1085.0    0.000922    1065.14636   1065.12842
  1129.0    0.000886    1065.56812   1065.54980
  1081.0    0.000925    1065.99023   1065.97229
  1098.0    0.000911    1066.41260   1066.39429
  1071.0    0.000934    1066.83484   1066.81665
  1097.0    0.000912    1067.25830   1067.24048
  1151.0    0.000869    1067.68225   1067.66455
  1147.0    0.000872    1068.10657   1068.08875
  1120.0    0.000893    1068.53101   1068.51343
  1125.0    0.000889    1068.95557   1068.93811
  1143.0    0.000875    1069.38196   1069.36414
  1091.0    0.000917    1069.80713   1069.78967
  1144.0    0.000874    1070.23413   1070.21631
  1111.0    0.000900    1070.66052   1070.64343
  1124.0    0.000890    1071.08789   1071.07056
  1112.0    0.000899    1071.51587   1071.49854
  1098.0    0.000911    1071.94397   1071.92676
  1170.0    0.000855    1072.37231   1072.35535
  1252.0    0.000799    1072.80151   1072.78430
  1154.0    0.000867    1073.23120   1073.21423
  1186.0    0.000843    1073.66040   1073.64368
  1115.0    0.000897    1074.09143   1074.07422
  1116.0    0.000896    1074.52161   1074.50464
  1047.0    0.000955    1074.95227   1074.93591
  1136.0    0.000880    1075.38440   1075.36780
  1147.0    0.000872    1075.81628   1075.79968
  1120.0    0.000893    1076.24902   1076.23267
  1135.0    0.000881    1076.68115   1076.66479
  1127.0    0.000887    1077.11511   1077.09863
  1141.0    0.000876    1077.54858   1077.53210
  1115.0    0.000897    1077.98242   1077.96594
  1162.0    0.000861    1078.41699   1078.40039
  1079.0    0.000927    1078.85242   1078.83582
  1090.0    0.000917    1079.28687   1079.27100
  1145.0    0.000873    1079.72302   1079.70667
  1116.0    0.000896    1080.15918   1080.14294
  1146.0    0.000873    1080.59619   1080.58008
  1146.0    0.000873    1081.03247   1081.01636
  1111.0    0.000900    1081.46985   1081.45435
  1114.0    0.000898    1081.90747   1081.89172
  1121.0    0.000892    1082.34631   1082.33057
  1194.0    0.000838    1082.78467   1082.76904
  1104.0    0.000906    1083.22339   1083.20789
  1092.0    0.000916    1083.66345   1083.64783
  1089.0    0.000918    1084.10278   1084.08740
  1152.0    0.000868    1084.54321   1084.52795
  1077.0    0.000929    1084.98340   1084.96814
  1143.0    0.000875    1085.42493   1085.40942
  1129.0    0.000886    1085.86633   1085.85083
  1145.0    0.000873    1086.30798   1086.29260
  1043.0    0.000959    1086.75037   1086.73535
  1090.0    0.000917    1087.19299   1087.17798
  1117.0    0.000895    1087.63562   1087.62073
  1101.0    0.000908    1088.07898   1088.06409
  1090.0    0.000917    1088.52246   1088.50769
  1164.0    0.000859    1088.96667   1088.95190
  1146.0    0.000873    1089.41150   1089.39685
  1182.0    0.000846    1089.85669   1089.84204
  1111.0    0.000900    1090.30176   1090.28711
  1061.0    0.000943    1090.74768   1090.73315
  1166.0    0.000858    1091.19373   1091.17920
  1135.0    0.000881    1091.63953   1091.62488
  1122.0    0.000891    1092.08655   1092.07227
  1110.0    0.000901    1092.53394   1092.51941
  1152.0    0.000868    1092.98181   1092.96765
  1150.0    0.000870    1093.42883   1093.41504
  1073.0    0.000932    1093.87793   1093.86389
  1075.0    0.000930    1094.32642   1094.31250
  1095.0    0.000913    1094.77551   1094.76135
  1108.0    0.000903    1095.22485   1095.21094
  1091.0    0.000917    1095.67480   1095.66064
  1100.0    0.000909    1096.12488   1096.11072
  1064.0    0.000940    1096.57556   1096.56140
  1078.0    0.000928    1097.02625   1097.01257
  1129.0    0.000886    1097.47815   1097.46448
  1105.0    0.000905    1097.92969   1097.91602
  1094.0    0.000914    1098.38135   1098.36816
  1145.0    0.000873    1098.83398   1098.82007
  1088.0    0.000919    1099.28687   1099.27368
  1100.0    0.000909    1099.74011   1099.72681
  1098.0    0.000911    1100.19336   1100.17993
  1079.0    0.000927    1100.64648   1100.63354
  1131.0    0.000884    1101.10059   1101.08752
  1130.0    0.000885    1101.55493   1101.54211
  1061.0    0.000943    1102.01013   1101.99683
  1100.0    0.000909    1102.46558   1102.45239
  1026.0    0.000975    1102.92102   1102.90808
  1076.0    0.000929    1103.37732   1103.36426
  1108.0    0.000903    1103.83362   1103.82043
  1143.0    0.000875    1104.29053   1104.27734
  1085.0    0.000922    1104.74695   1104.73425
  1170.0    0.000855    1105.20435   1105.19202
  1136.0    0.000880    1105.66211   1105.64954
  1129.0    0.000886    1106.11914   1106.10718
  1057.0    0.000946    1106.57813   1106.56555
  1128.0    0.000887    1107.03699   1107.02417
  1165.0    0.000858    1107.49561   1107.48328
  1127.0    0.000887    1107.95508   1107.94263
  1057.0    0.000946    1108.41479   1108.40222
  1126.0    0.000888    1108.87415   1108.86206
  1077.0    0.000929    1109.33533   1109.32288
  1101.0    0.000908    1109.79602   1109.78381
  1151.0    0.000869    1110.25696   1110.24475
  1084.0    0.000923    1110.71826   1110.70642
  1141.0    0.000876    1111.17969   1111.39258
  1167.0    0.000857    1111.64160   1111.87939
  1047.0    0.000955    1112.10449   1112.48523
  1076.0    0.000929    1112.56665   1112.99597
  1098.0    0.000911    1113.02917   1113.51550
  1115.0    0.000897    1113.49292   1114.04834
  1097.0    0.000912    1113.95642   1114.59692
  1150.0    0.000870    1114.42078   1115.16614
  1101.0    0.000908    1114.88428   1115.76245
  1124.0    0.000890    1115.34937   1116.39722
  1117.0    0.000895    1115.81409   1117.08569
  1141.0    0.000876    1116.27930   1117.85217
  1262.0    0.000792    1116.74414   1118.73999
  1114.0    0.000898    1117.21082   1119.84302
  1129.0    0.000886    1117.67700   1121.42200
  1133.0    0.000883    1118.14282   1124.20764
  1170.0    0.000855    1118.61023   1129.74780
  1123.0    0.000890    1119.07666   1139.93982
  1164.0    0.000859    1119.54431   1154.72656
  1102.0    0.000907    1120.01172   1167.61206
  1101.0    0.000908    1120.47974   1168.75842
  1095.0    0.000913    1120.94800   1160.35706
  1111.0    0.000900    1121.41675   1147.69666
  1132.0    0.000883    1121.88562   1136.93140
  1149.0    0.000870    1122.35474   1130.56470
  1114.0    0.000898    1122.82397   1127.57776
  1089.0    0.000918    1123.29358   1126.40820
  1077.0    0.000929    1123.76392   1126.03125
  1105.0    0.000905    1124.23438   1125.98682
  1099.0    0.000910    1124.70471   1126.10474
  1139.0    0.000878    1125.17578   1126.31921
  1073.0    0.000932    1125.64685   1126.59814
  1120.0    0.000893    1126.11853   1126.92139
  1074.0    0.000931    1126.59021   1127.27661
  1147.0    0.000872    1127.06250   1127.65588
  1095.0    0.000913    1127.53467   1128.05212
  1020.0    0.000980    1128.00720   1128.46240
  1140.0    0.000877    1128.47986   1128.88367
  1137.0    0.000880    1128.95300   1129.08301
  1086.0    0.000921    1129.42615   1129.54150
  1165.0    0.000858    1129.90063   1129.89075
  1117.0    0.000895    1130.37476   1130.36511
  1112.0    0.000899    1130.84875   1130.83936
  1167.0    0.000857    1131.32312   1131.31384
  1128.0    0.000887    1131.79785   1131.78870
  1132.0    0.000883    1132.27356   1132.26416
  1170.0    0.000855    1132.74854   1132.73950
  1078.0    0.000928    1133.22461   1133.21545
  1142.0    0.000876    1133.70020   1133.69128
  1117.0    0.000895    1134.17590   1134.16724
  1110.0    0.000901    1134.65332   1134.64429
  1109.0    0.000902    1135.12927   1135.12097
  1149.0    0.000870    1135.60657   1135.59778
  1148.0    0.000871    1136.08350   1136.07495
  1096.0    0.000912    1136.56116   1136.55273
  1116.0    0.000896    1137.03882   1137.03015
  1086.0    0.000921    1137.51721   1137.50842
  1103.0    0.000907    1137.99512   1137.98669
  1144.0    0.000874    1138.47351   1138.46521
  1125.0    0.000889    1138.95239   1138.94421
  1128.0    0.000887    1139.43201   1139.42346
  1129.0    0.000886    1139.91028   1139.90247
  1129.0    0.000886    1140.39014   1140.38184
  1195.0    0.000837    1140.87000   1140.86182
  1042.0    0.000960    1141.34985   1141.34192
  1113.0    0.000898    1141.83044   1141.82263
  1162.0    0.000861    1142.31042   1142.30249
  1154.0    0.000867    1142.79126   1142.78369
  1127.0    0.000887    1143.27234   1143.26465
  1094.0    0.000914    1143.75342   1143.74585
  1098.0    0.000911    1144.23486   1144.22742
  1100.0    0.000909    1144.71667   1144.70911
  1093.0    0.000915    1145.19873   1145.19092
  1132.0    0.000883    1145.68054   1145.67334
  1107.0    0.000903    1146.16357   1146.15649
  1037.0    0.000964    1146.64624   1146.63879
  1120.0    0.000893    1147.12878   1147.12134
  1112.0    0.000899    1147.61194   1147.60461
  1127.0    0.000887    1148.09521   1148.08777
  1127.0    0.000887    1148.57898   1148.57214
  1117.0    0.000895    1149.06250   1149.05579
  1168.0    0.000856    1149.54651   1149.53992
  1074.0    0.000931    1150.03101   1150.02380
  1107.0    0.000903    1150.51501   1150.50793
  1075.0    0.000930    1151.00024   1150.99365
  1158.0    0.000864    1151.48511   1151.47791
  1113.0    0.000898    1151.96997   1151.96338
  1061.0    0.000943    1152.45520   1152.44885
  1128.0    0.000887    1152.94116   1152.93469
  1170.0    0.000855    1153.42615   1153.41968
  1100.0    0.000909    1153.91248   1153.90601
  1102.0    0.000907    1154.39868   1154.39221
  1064.0    0.000940    1154.88477   1154.87842
  1072.0    0.000933    1155.37170   1155.36523
  1150.0    0.000870    1155.85840   1155.85205
  1100.0    0.000909    1156.34595   1156.33960
  1098.0    0.000911    1156.83264   1156.82666
  1181.0    0.000847    1157.31982   1157.31384
  1122.0    0.000891    1157.80774   1157.80139
  1122.0    0.000891    1158.29553   1159.20532
  1138.0    0.000879    1158.78320   1159.73462
  1152.0    0.000868    1159.27136   1160.72156
  1033.0    0.000968    1159.76025   1161.28101
  1064.0    0.000940    1160.24890   1161.84888
  1050.0    0.000952    1160.73767   1162.42590
  1120.0    0.000893    1161.22668   1163.01624
  1145.0    0.000873    1161.71558   1163.62268
  1085.0    0.000922    1162.20471   1164.25061
  1119.0    0.000894    1162.69482   1164.90796
  1122.0    0.000891    1163.18420   1165.60059
  1141.0    0.000876    1163.67407   1166.34143
  1150.0    0.000870    1164.16455   1167.14563
  1081.0    0.000925    1164.65479   1168.02881
  1133.0    0.000883    1165.14526   1169.01660
  1142.0    0.000876    1165.63574   1170.13562
  1069.0    0.000935    1166.12708   1171.42078
  1080.0    0.000926    1166.61792   1172.91345
  1121.0    0.000892    1167.10889   1174.66089
  1063.0    0.000941    1167.60059   1176.72021
  1163.0    0.000860    1168.09131   1179.15381
  1148.0    0.000871    1168.58374   1182.03369
  1143.0    0.000875    1169.07532   1185.43604
  1152.0    0.000868    1169.56763   1189.44128
  1105.0    0.000905    1170.05957   1194.13208
  1097.0    0.000912    1170.55237   1199.59229
  1126.0    0.000888    1171.04504   1205.89661
  1143.0    0.000875    1171.53735   1213.11279
  1124.0    0.000890    1172.03076   1221.29590
  1115.0    0.000897    1172.52344   1230.47681
  1092.0    0.000916    1173.01697   1240.66479
  1105.0    0.000905    1173.51013   1251.83716
  1093.0    0.000915    1174.00378   1263.93750
  1070.0    0.000935    1174.49707   1276.87036
  1083.0    0.000923    1174.99133   1290.49915
  1139.0    0.000878    1175.48511   1304.64795
  1076.0    0.000929    1175.97913   1319.09998
  1149.0    0.000870    1176.47363   1333.60107
  1140.0    0.000877    1176.96814   1347.86609
  1097.0    0.000912    1177.46289   1361.58435
  1137.0    0.000880    1177.95752   1374.42993
  1104.0    0.000906    1178.45215   1386.07227
  1109.0    0.000902    1178.94714   1396.18884
  1107.0    0.000903    1179.44275   1404.48340
  1138.0    0.000879    1179.93774   1410.69861
  1065.0    0.000939    1180.43347   1414.64075
  1172.0    0.000853    1180.92944   1416.18652
  1135.0    0.000881    1181.42468   1415.29895
  1133.0    0.000883    1181.92102   1412.02905
  1148.0    0.000871    1182.41675   1406.50964
  1153.0    0.000867    1182.91345   1398.94641
  1078.0    0.000928    1183.40942   1389.60071
  1133.0    0.000883    1183.90552   1378.77332
  1094.0    0.000914    1184.40247   1366.78870
  1163.0    0.000860    1184.89893   1353.97632
  1123.0    0.000890    1185.39600   1340.66138
  1127.0    0.000887    1185.89294   1327.14941
  1132.0    0.000883    1186.38977   1313.72241
  1115.0    0.000897    1186.88757   1300.62976
  1101.0    0.000908    1187.38416   1288.08179
  1121.0    0.000892    1187.88232   1276.25134
  1075.0    0.000930    1188.37939   1265.26563
  1067.0    0.000937    1188.87744   1255.21729
  1168.0    0.000856    1189.37537   1246.15674
  1056.0    0.000947    1189.87280   1238.10217
  1101.0    0.000908    1190.37073   1231.04236
  1142.0    0.000876    1190.86938   1224.94116
  1089.0    0.000918    1191.36780   1219.74316
  1143.0    0.000875    1191.86548   1215.37842
  1094.0    0.000914    1192.36426   1211.77173
  1079.0    0.000927    1192.86267   1208.83923
  1174.0    0.000852    1193.36121   1206.49829
  1087.0    0.000920    1193.85986   1204.66931
  1143.0    0.000875    1194.35938   1203.27637
  1145.0    0.000873    1194.85864   1202.24927
  1145.0    0.000873    1195.35767   1201.52600
  1182.0    0.000846    1195.85620   1201.05139
  1094.0    0.000914    1196.35583   1200.77844
  1155.0    0.000866    1196.85498   1200.66663
  1164.0    0.000859    1197.35449   1200.68213
  1141.0    0.000876    1197.85449   1200.79919
  1111.0    0.000900    1198.35400   1200.99365
  1140.0    0.000877    1198.85388   1201.24854
  1138.0    0.000879    1199.35364   1201.54932
  1119.0    0.000894    1199.85388   1201.88635
  1117.0    0.000895    1200.35315   1202.24976
  1148.0    0.000871    1200.85376   1202.63477
  1165.0    0.000858    1201.35437   1203.03540
  1133.0    0.000883    1201.85425   1203.44836
  1225.0    0.000816    1202.35486   1203.87134
  1145.0    0.000873    1202.85535   1204.30225
  1126.0    0.000888    1203.35583   1203.84436
  1062.0    0.000942    1203.85620   1204.32324
  1143.0    0.000875    1204.35706   1204.35583
  1114.0    0.000898    1204.85779   1204.85718
  1208.0    0.000828    1205.35852   1205.35815
  1124.0    0.000890    1205.85950   1205.85876
  1139.0    0.000878    1206.36047   1206.35986
  1183.0    0.000845    1206.86133   1206.86084
  1141.0    0.000876    1207.36279   1207.36243
  1147.0    0.000872    1207.86414   1207.86316
  1096.0    0.000912    1208.36511   1208.36487
  1204.0    0.000831    1208.86646   1208.86633
  1123.0    0.000890    1209.36780   1209.36719
  1187.0    0.000842    1209.86938   1209.86902
  1217.0    0.000822    1210.37073   1210.37036
  1103.0    0.000907    1210.87244   1210.87219
  1113.0    0.000898    1211.37402   1211.37366
  1148.0    0.000871    1211.87573   1211.87561
  1135.0    0.000881    1212.37732   1212.37720
  1084.0    0.000923    1212.87927   1212.87927
  1126.0    0.000888    1213.38147   1213.38159
  1183.0    0.000845    1213.88318   1213.88342
  1145.0    0.000873    1214.38513   1214.38513
  1131.0    0.000884    1214.88721   1214.88733
  1197.0    0.000835    1215.38879   1215.38879
  1096.0    0.000912    1215.89136   1215.89136
  1124.0    0.000890    1216.39319   1216.39368
  1164.0    0.000859    1216.89575   1216.89563
  1181.0    0.000847    1217.39783   1217.39819
  1161.0    0.000861    1217.90063   1217.90063
  1138.0    0.000879    1218.40234   1218.40283
  1096.0    0.000912    1218.90430   1218.90479
  1144.0    0.000874    1219.40698   1219.40747
  1133.0    0.000883    1219.90967   1219.91028
  1195.0    0.000837    1220.41211   1220.41272
  1112.0    0.000899    1220.91455   1220.91516
  1136.0    0.000880    1221.41711   1221.41785
  1127.0    0.000887    1221.91956   1221.92078
  1182.0    0.000846    1222.42212   1222.42310
  1176.0    0.000850    1222.92480   1222.92590
  1135.0    0.000881    1223.42725   1223.42773
  1113.0    0.000898    1223.93042   1223.93152
  1157.0    0.000864    1224.43286   1224.43372
  1157.0    0.000864    1224.93494   1224.93652
  1136.0    0.000880    1225.43823   1225.43921
  1107.0    0.000903    1225.94104   1225.94189
  1175.0    0.000851    1226.44312   1226.44458
  1186.0    0.000843    1226.94666   1226.94800
  1187.0    0.000842    1227.44873   1227.45020
  1075.0    0.000930    1227.95178   1227.95313
  1161.0    0.000861    1228.45532   1228.45654
  1126.0    0.000888    1228.95789   1228.95972
  1106.0    0.000904    1229.46045   1229.46204
  1125.0    0.000889    1229.96326   1229.96497
  1187.0    0.000842    1230.46655   1230.46814
  1125.0    0.000889    1230.96912   1230.97107
  1160.0    0.000862    1231.47192   1231.47375
  1185.0    0.000844    1231.97461   1231.97644
  1184.0    0.000845    1232.47778   1232.47937
  1121.0    0.000892    1232.98108   1232.98279
  1163.0    0.000860    1233.48352   1233.48547
  1176.0    0.000850    1233.98645   1233.98840
  1151.0    0.000869    1234.48950   1234.49121
  1190.0    0.000840    1234.99170   1234.99402
  1159.0    0.000863    1235.49536   1235.49756
  1133.0    0.000883    1235.99805   1236.00012
  1177.0    0.000850    1236.50085   1236.50269
  1130.0    0.000885    1237.00354   1237.00537
  1110.0    0.000901    1237.50659   1237.50891
  1134.0    0.000882    1238.00940   1238.01147
  1111.0    0.000900    1238.51172   1238.51416
  1158.0    0.000864    1239.01489   1239.01721
  1170.0    0.000855    1239.51733   1239.52014
  1143.0    0.000875    1240.02002   1240.02271
  1203.0    0.000831    1240.52271   1240.52551
  1190.0    0.000840    1241.02600   1241.02832
  1164.0    0.000859    1241.52881   1241.53137
  1207.0    0.000829    1242.03088   1242.03394
  1084.0    0.000923    1242.53369   1242.53601
  1194.0    0.000838    1243.03650   1243.03931
  1136.0    0.000880    1243.53833   1243.54138
  1105.0    0.000905    1244.04163   1244.04456
  1143.0    0.000875    1244.54395   1244.54663
  1164.0    0.000859    1245.04614   1245.04919
  1210.0    0.000826    1245.54919   1245.55212
  1153.0    0.000867    1246.05176   1246.05493
  1158.0    0.000864    1246.55396   1246.55688
  1187.0    0.000842    1247.05652   1247.05920
  1131.0    0.000884    1247.55859   1247.56165
  1137.0    0.000880    1248.06091   1248.06421
  1141.0    0.000876    1248.56299   1248.56628
  1152.0    0.000868    1249.06531   1249.06885
  1159.0    0.000863    1249.56738   1249.57080
  1148.0    0.000871    1250.06958   1250.07275
  1200.0    0.000833    1250.57117   1250.57458
  1152.0    0.000868    1251.07373   1251.07690
  1173.0    0.000853    1251.57532   1251.57886
  1112.0    0.000899    1252.07764   1252.08105
  1179.0    0.000848    1252.57910   1252.58264
  1136.0    0.000880    1253.08093   1253.08472
  1105.0    0.000905    1253.58252   1253.58606
  1174.0    0.000852    1254.08423   1254.08789
  1129.0    0.000886    1254.58582   1254.58948
  1203.0    0.000831    1255.08740   1255.09143
  1119.0    0.000894    1255.58923   1255.59277
  1163.0    0.000860    1256.09033   1256.09412
  1158.0    0.000864    1256.59180   1256.59595
  1149.0    0.000870    1257.09326   1257.09766
  1160.0    0.000862    1257.59448   1257.59851
  1193.0    0.000838    1258.09546   1258.09973
  1129.0    0.000886    1258.59668   1258.60071
  1175.0    0.000851    1259.09827   1259.10242
  1200.0    0.000833    1259.59863   1259.60303
  1120.0    0.000893    1260.09998   1260.10400
  1138.0    0.000879    1260.60059   1260.60498
  1215.0    0.000823    1261.10120   1261.10571
  1127.0    0.000887    1261.60242   1261.60669
  1177.0    0.000850    1262.10278   1262.10681
  1166.0    0.000858    1262.60315   1262.60779
  1149.0    0.000870    1263.10449   1263.10876
  1176.0    0.000850    1263.60437   1263.60889
  1197.0    0.000835    1264.10413   1264.10876
  1152.0    0.000868    1264.60474   1264.60913
  1188.0    0.000842    1265.10461   1265.10925
  1187.0    0.000842    1265.60486   1265.60962
  1206.0    0.000829    1266.10535   1266.10986
  1208.0    0.000828    1266.60498   1266.60962
  1196.0    0.000836    1267.10474   1267.10950
  1172.0    0.000853    1267.60449   1267.60889
  1200.0    0.000833    1268.10413   1268.10925
  1152.0    0.000868    1268.60327   1268.60852
  1165.0    0.000858    1269.10266   1269.10754
  1206.0    0.000829    1269.60278   1269.60779
  1182.0    0.000846    1270.10144   1270.10669
  1157.0    0.000864    1270.60034   1270.60522
  1128.0    0.000887    1271.09912   1271.10461
  1186.0    0.000843    1271.59839   1271.60339
  1217.0    0.000822    1272.09741   1272.10254
  1164.0    0.000859    1272.59583   1272.60071
  1178.0    0.000849    1273.09448   1273.10010
  1148.0    0.000871    1273.59314   1273.59839
  1157.0    0.000864    1274.09119   1274.09680
  1151.0    0.000869    1274.58960   1274.59485
  1201.0    0.000833    1275.08752   1275.09290
  1179.0    0.000848    1275.58557   1275.59106
  1127.0    0.000887    1276.08362   1276.08911
  1233.0    0.000811    1276.58179   1276.58704
  1211.0    0.000826    1277.07947   1277.08521
  1191.0    0.000840    1277.57690   1277.58228
  1249.0    0.000801    1278.07397   1278.07996
  1259.0    0.000794    1278.57178   1278.57739
  1213.0    0.000824    1279.06885   1279.07446
  1216.0    0.000822    1279.56543   1279.57166
  1174.0    0.000852    1280.06299   1280.06860
  1174.0    0.000852    1280.55969   1280.56567
  1243.0    0.000805    1281.05652   1281.06238
  1219.0    0.000820    1281.55310   1281.55896
  1211.0    0.000826    1282.04980   1282.05579
  1190.0    0.000840    1282.54590   1282.55176
  1137.0    0.000880    1283.04211   1283.04810
  1179.0    0.000848    1283.53833   1283.54443
  1146.0    0.000873    1284.03430   1284.04028
  1221.0    0.000819    1284.53003   1284.53625
  1224.0    0.000817    1285.02539   1285.03162
  1253.0    0.000798    1285.52075   1285.52710
  1182.0    0.000846    1286.01587   1286.02222
  1229.0    0.000814    1286.51172   1286.51794
  1189.0    0.000841    1287.00610   1287.01306
  1130.0    0.000885    1287.50195   1287.50818
  1206.0    0.000829    1287.99646   1288.00317
  1209.0    0.000827    1288.49121   1288.49756
  1178.0    0.000849    1288.98560   1288.99194
  1223.0    0.000818    1289.48010   1289.48645
  1219.0    0.000820    1289.97461   1289.98083
  1240.0    0.000806    1290.46851   1290.47522
  1217.0    0.000822    1290.96228   1290.96912
  1200.0    0.000833    1291.45618   1291.46289
  1187.0    0.000842    1291.94946   1291.95618
  1284.0    0.000779    1292.44312   1292.45020
  1236.0    0.000809    1292.93616   1292.94287
  1227.0    0.000815    1293.42932   1293.43591
  1200.0    0.000833    1293.92224   1293.92932
  1206.0    0.000829    1294.41528   1294.42224
  1210.0    0.000826    1294.90771   1294.91479
  1192.0    0.000839    1295.40002   1295.40698
  1288.0    0.000776    1295.89185   1295.89929
  1193.0    0.000838    1296.38464   1296.39197
  1218.0    0.000821    1296.87646   1296.88318
  1229.0    0.000814    1297.36829   1297.37549
  1205.0    0.000830    1297.85999   1297.86719
  1222.0    0.000818    1298.35120   1298.35828
  1219.0    0.000820    1298.84265   1298.85022
  1194.0    0.000838    1299.33398   1299.34082
  1247.0    0.000802    1299.82458   1299.83191
  1238.0    0.000808    1300.31555   1300.32288
  1253.0    0.000798    1300.80603   1300.81311
  1201.0    0.000833    1301.29639   1301.30396
  1263.0    0.000792    1301.78662   1301.79407
  1275.0    0.000784    1302.27661   1302.28394
  1208.0    0.000828    1302.76636   1302.77417
  1239.0    0.000807    1303.25623   1303.26379
  1214.0    0.000824    1303.74573   1303.75317
  1281.0    0.000781    1304.23486   1304.24231
  1230.0    0.000813    1304.72424   1304.73145
  1232.0    0.000812    1305.21326   1305.22034
  1209.0    0.000827    1305.70166   1305.70923
  1196.0    0.000836    1306.19006   1306.19751
  1158.0    0.000864    1306.67847   1306.68567
  1181.0    0.000847    1307.16626   1307.17395
  1167.0    0.000857    1307.65491   1307.66248
  1221.0    0.000819    1308.14221   1308.15002
  1194.0    0.000838    1308.62988   1308.63770
  1241.0    0.000806    1309.11707   1309.12524
  1242.0    0.000805    1309.60437   1309.61182
  1202.0    0.000832    1310.09082   1310.09863
  1276.0    0.000784    1310.57800   1310.58557
  1265.0    0.000791    1311.06433   1311.07239
  1173.0    0.000853    1311.55066   1311.55835
  1252.0    0.000799    1312.03638   1312.04456
  1222.0    0.000818    1312.52246   1312.53040
  1268.0    0.000789    1313.00793   1313.01563
  1250.0    0.000800    1313.49377   1313.50183
  1265.0    0.000791    1313.97852   1313.98682
  1237.0    0.000808    1314.46375   1314.47192
  1252.0    0.000799    1314.94873   1314.95715
  1206.0    0.000829    1315.43335   1315.44165
  1256.0    0.000796    1315.91760   1315.92566
  1182.0    0.000846    1316.40161   1316.40991
  1209.0    0.000827    1316.88562   1316.89368
  1203.0    0.000831    1317.36926   1317.37756
  1232.0    0.000812    1317.85242   1317.86121
  1252.0    0.000799    1318.33606   1318.34436
  1257.0    0.000796    1318.81909   1318.82739
  1240.0    0.000806    1319.30176   1319.31018
  1262.0    0.000792    1319.78467   1319.79333
  1231.0    0.000812    1320.26660   1320.27515
  1251.0    0.000799    1320.74866   1320.75745
  1226.0    0.000816    1321.23120   1321.23975
  1260.0    0.000794    1321.71265   1321.72095
  1225.0    0.000816    1322.19385   1322.20251
  1280.0    0.000781    1322.67444   1322.68323
  1232.0    0.000812    1323.15576   1323.16431
  1233.0    0.000811    1323.63684   1323.64551
  1214.0    0.000824    1324.11694   1324.12598
  1233.0    0.000811    1324.59741   1324.60620
  1236.0    0.000809    1325.07739   1325.08582
  1184.0    0.000845    1325.55676   1325.56543
  1271.0    0.000787    1326.03638   1326.04529
  1230.0    0.000813    1326.51563   1326.52478
  1198.0    0.000835    1326.99451   1327.00330
  1304.0    0.000767    1327.47363   1327.48230
  1263.0    0.000792    1327.95239   1327.96106
  1375.0    0.000727    1328.42969   1328.43860
  1269.0    0.000788    1328.90796   1328.91699
  1329.0    0.000752    1329.38611   1329.39539
  1223.0    0.000818    1329.86292   1329.87183
  1290.0    0.000775    1330.34045   1330.34961
  1223.0    0.000818    1330.81763   1330.82654
  1233.0    0.000811    1331.29443   1331.30347
  1189.0    0.000841    1331.77014   1331.77930
  1305.0    0.000766    1332.24658   1332.25549
  1233.0    0.000811    1332.72278   1332.73169
  1314.0    0.000761    1333.19788   1333.20728
  1247.0    0.000802    1333.67322   1333.68225
  1302.0    0.000768    1334.14819   1334.15784
  1277.0    0.000783    1334.62305   1334.63208
  1270.0    0.000787    1335.09753   1335.10693
  1293.0    0.000773    1335.57239   1335.58130
  1274.0    0.000785    1336.04626   1336.05542
  1271.0    0.000787    1336.51990   1336.52905
  1234.0    0.000810    1336.99365   1337.00317
  1239.0    0.000807    1337.46631   1337.47583
  1258.0    0.000795    1337.93982   1337.94946
  1291.0    0.000775    1338.41248   1338.42224
  1252.0    0.000799    1338.88477   1338.89417
  1287.0    0.000777    1339.35681   1339.36633
  1273.0    0.000786    1339.82874   1339.83838
  1246.0    0.000803    1340.30005   1340.30920
  1255.0    0.000797    1340.77136   1340.78064
  1284.0    0.000779    1341.24231   1341.25183
  1243.0    0.000805    1341.71313   1341.72266
  1340.0    0.000746    1342.18347   1342.19299
  1267.0    0.000789    1342.65356   1342.66309
  1254.0    0.000797    1343.12329   1343.13257
  1278.0    0.000782    1343.59326   1343.60266
  1260.0    0.000794    1344.06201   1344.07153
  1210.0    0.000826    1344.53076   1344.54028
  1240.0    0.000806    1344.99951   1345.00903
  1308.0    0.000765    1345.46753   1345.47766
  1292.0    0.000774    1345.93604   1345.94568
  1241.0    0.000806    1346.40393   1346.41382
  1254.0    0.000797    1346.87122   1346.88098
  1265.0    0.000791    1347.33801   1347.34790
  1237.0    0.000808    1347.80518   1347.81506
  1293.0    0.000773    1348.27161   1348.28162
  1205.0    0.000830    1348.73755   1348.74768
  1318.0    0.000759    1349.20398   1349.21362
  1367.0    0.000732    1349.66931   1349.67896
  1306.0    0.000766    1350.13428   1350.14441
  1300.0    0.000769    1350.59973   1350.60950
  1269.0    0.000788    1351.06421   1351.07397
  1262.0    0.000792    1351.52856   1351.53821
  1270.0    0.000787    1351.99268   1352.00281
  1344.0    0.000744    1352.45605   1352.46594
  1236.0    0.000809    1352.92017   1352.92981
  1204.0    0.000831    1353.38281   1353.39319
  1297.0    0.000771    1353.84558   1353.85522
  1344.0    0.000744    1354.30847   1354.31873
  1296.0    0.000772    1354.77014   1354.78040
  1312.0    0.000762    1355.23206   1355.24219
  1288.0    0.000776    1355.69360   1355.70386
  1318.0    0.000759    1356.15515   1356.16541
  1262.0    0.000792    1356.61572   1356.62585
  1360.0    0.000735    1357.07617   1357.08618
  1281.0    0.000781    1357.53662   1357.54675
  1320.0    0.000758    1357.99609   1358.00623
  1323.0    0.000756    1358.45605   1358.46619
  1285.0    0.000778    1358.91516   1358.92517
  1350.0    0.000741    1359.37427   1359.38428
  1350.0    0.000741    1359.83264   1359.84241
  1307.0    0.000765    1360.29028   1360.30066
  1368.0    0.000731    1360.74817   1360.75854
  1347.0    0.000742    1361.20581   1361.21606
  1337.0    0.000748    1361.66357   1361.67371
  1408.0    0.000710    1362.11963   1362.12988
  1408.0    0.000710    1362.57654   1362.58691
  1302.0    0.000768    1363.03259   1363.18860
  1331.0    0.000751    1363.48853   1363.66016
  1361.0    0.000735    1363.94385   1364.13440
  1323.0    0.000756    1364.39880   1364.61072
  1343.0    0.000745    1364.85388   1365.17053
  1435.0    0.000697    1365.30823   1365.66492
  1399.0    0.000715    1365.76233   1366.16724
  1381.0    0.000724    1366.21606   1366.67993
  1362.0    0.000734    1366.67004   1367.20740
  1434.0    0.000697    1367.12268   1367.75293
  1413.0    0.000708    1367.57581   1368.32654
  1462.0    0.000684    1368.02734   1368.93665
  1395.0    0.000717    1368.47974   1369.60327
  1455.0    0.000687    1368.93152   1370.36145
  1430.0    0.000699    1369.38257   1371.28967
  1416.0    0.000706    1369.83337   1372.60620
  1456.0    0.000687    1370.28357   1374.83130
  1546.0    0.000647    1370.73413   1378.82385
  1524.0    0.000656    1371.18420   1385.24707
  1534.0    0.000652    1371.63281   1393.06641
  1559.0    0.000641    1372.08203   1397.49402
  1671.0    0.000598    1372.53088   1395.81226
  1618.0    0.000618    1372.97949   1392.96265
  1640.0    0.000610    1373.42761   1390.33301
  1766.0    0.000566    1373.87500   1386.18054
  1765.0    0.000567    1374.32251   1382.40979
  1822.0    0.000549    1374.76892   1379.74316
  1869.0    0.000535    1375.21558   1378.45325
  1980.0    0.000505    1375.66223   1378.03760
  2054.0    0.000487    1376.10718   1378.25317
  2048.0    0.000488    1376.55261   1378.49915
  2022.0    0.000495    1376.99805   1378.86072
  2049.0    0.000488    1377.44177   1379.30420
  2081.0    0.000481    1377.88660   1379.82178
  2090.0    0.000478    1378.33044   1380.41467
  2152.0    0.000465    1378.77405   1381.09485
  2056.0    0.000486    1379.21655   1381.88757
  2119.0    0.000472    1379.65967   1382.83997
  2171.0    0.000461    1380.10229   1384.04346
  2024.0    0.000494    1380.54346   1385.57153
  2061.0    0.000485    1380.98547   1388.36804
  2041.0    0.000490    1381.42639   1393.67175
  2081.0    0.000481    1381.86731   1403.54700
  2050.0    0.000488    1382.30774   1419.40979
  2011.0    0.000497    1382.74744   1437.41907
  1988.0    0.000503    1383.18726   1444.84570
  1928.0    0.000519    1383.62634   1438.57397
  1953.0    0.000512    1384.06494   1431.33252
  1988.0    0.000503    1384.50281   1424.38062
  1973.0    0.000507    1384.94165   1413.60999
  1955.0    0.000512    1385.37903   1403.26013
  1898.0    0.000527    1385.81604   1396.40833
  1989.0    0.000503    1386.25269   1392.76392
  1976.0    0.000506    1386.68921   1391.09973
  1899.0    0.000527    1387.12524   1390.39832
  1949.0    0.000513    1387.56055   1390.12939
  1918.0    0.000521    1387.99634   1390.07764
  1930.0    0.000518    1388.43054   1390.15356
  1892.0    0.000529    1388.86548   1390.31592
  1831.0    0.000546    1389.29919   1406.72766
  1919.0    0.000521    1389.73291   1407.69604
  1938.0    0.000516    1390.16541   1408.75085
  1981.0    0.000505    1390.59863   1409.89453
  1952.0    0.000512    1391.03052   1419.41101
  2110.0    0.000474    1391.46228   1420.75085
  1895.0    0.000528    1391.89404   1422.66174
  1957.0    0.000511    1392.32458   1424.76233
  1913.0    0.000523    1392.75586   1426.91235
  2009.0    0.000498    1393.18555   1429.57935
  1908.0    0.000524    1393.61536   1432.64124
  2039.0    0.000490    1394.04504   1436.22144
  1931.0    0.000518    1394.47290   1440.47595
  2087.0    0.000479    1394.90222   1445.61487
  2048.0    0.000488    1395.33008   1451.90063
  2051.0    0.000488    1395.75781   1459.67053
  2017.0    0.000496    1396.18555   1469.34619
  2163.0    0.000462    1396.61157   1481.44312
  2139.0    0.000468    1397.03809   1496.59290
  2112.0    0.000473    1397.46472   1515.54443
  2197.0    0.000455    1397.88965   1539.17505
  2213.0    0.000452    1398.31458   1568.49719
  2301.0    0.000435    1398.73889   1604.65027
  2281.0    0.000438    1399.16345   1648.88831
  2454.0    0.000407    1399.58716   1702.55859
  2428.0    0.000412    1400.01001   1767.06482
  2548.0    0.000392    1400.43347   1843.82190
  2658.0    0.000376    1400.85559   1934.18823
  2599.0    0.000385    1401.27734   2039.40063
  2764.0    0.000362    1401.69946   2160.48364
  2861.0    0.0003495   1402.12061   2298.15796
  3037.0    0.0003293   1402.54089   2452.74951
  3143.0    0.0003182   1402.96094   2624.09399
  3313.0    0.0003018   1403.38135   2811.45386
  3464.0    0.0002887   1403.80066   3013.44556
  3694.0    0.0002707   1404.21912   3227.99658
  3856.0    0.0002593   1404.63782   3452.31860
  4175.0    0.0002395   1405.05591   3682.91333
  4431.0    0.0002257   1405.47339   3915.61646
  4725.0    0.0002116   1405.89063   4145.66406
  5156.0    0.0001939   1406.30688   4367.81055
  5410.0    0.0001848   1406.72327   4576.47510
  5881.0    0.0001700   1407.13831   4765.93457
  6049.0    0.0001653   1407.55432   4930.56982
  6345.0    0.0001576   1407.96899   5065.15137
  6441.0    0.0001553   1408.38342   5165.15723
  6737.0    0.0001484   1408.79724   5227.09668
  6825.0    0.0001465   1409.21069   5248.76660
  6848.0    0.0001460   1409.62390   5229.43457
  6570.0    0.0001522   1410.03638   5169.87598
  6375.0    0.0001569   1410.44836   5072.30371
  6176.0    0.0001619   1410.85999   4940.18115
  5467.0    0.0001829   1411.27087   4777.96387
  5299.0    0.0001887   1411.68152   4590.80713
  4952.0    0.0002019   1412.09216   4384.72607
  4582.0    0.0002182   1412.50098   4164.49072
  4315.0    0.0002317   1412.91028   3936.10669
  3997.0    0.0002502   1413.31909   3704.81152
  3822.0    0.0002616   1413.72766   3475.61084
  3634.0    0.0002752   1414.13562   3252.22559
  3478.0    0.0002875   1414.54236   3038.39722
  3207.0    0.0003118   1414.94946   2836.94141
  3077.0    0.0003250   1415.35583   2649.95654
  2991.0    0.0003343   1415.76221   2478.85474
  2972.0    0.0003365   1416.16724   2324.40527
  2803.0    0.000357    1416.57239   2186.80566
  2750.0    0.000364    1416.97693   2065.76367
  2640.0    0.000379    1417.38074   1960.59155
  2538.0    0.000394    1417.78430   1870.29749
  2438.0    0.000410    1418.18738   1793.67761
  2357.0    0.000424    1418.58972   1729.40210
  2280.0    0.000439    1418.99194   1676.08618
  2296.0    0.000436    1419.39343   1632.35474
  2292.0    0.000436    1419.79407   1596.88855
  2263.0    0.000442    1420.19531   1568.46106
  2165.0    0.000462    1420.59485   1545.96069
  2234.0    0.000448    1420.99500   1528.40747
  2113.0    0.000473    1421.39441   1514.95264
  2055.0    0.000487    1421.79260   1504.87756
  2060.0    0.000485    1422.19080   1497.58850
  2027.0    0.000493    1422.58838   1492.59900
  1986.0    0.000504    1422.98535   1489.52063
  1908.0    0.000524    1423.38220   1488.04370
  1972.0    0.000507    1423.77832   1487.92688
  1935.0    0.000517    1424.17358   1488.97668
  1920.0    0.000521    1424.56921   1491.03894
  2014.0    0.000497    1424.96375   1493.98132
  1940.0    0.000515    1425.35767   1497.68823
  1851.0    0.000540    1425.75146   1502.04956
  1777.0    0.000563    1426.14514   1506.95081
  1893.0    0.000528    1426.53784   1512.27295
  1835.0    0.000545    1426.92896   1517.88635
  1857.0    0.000539    1427.32117   1507.57068
  1809.0    0.000553    1427.71179   1513.98401
  1757.0    0.000569    1428.10278   1520.19519
  1712.0    0.000584    1428.49292   1517.91223
  1755.0    0.000570    1428.88232   1523.55713
  1808.0    0.000553    1429.27161   1528.48889
  1795.0    0.000557    1429.66003   1532.56018
  1661.0    0.000602    1430.04871   1535.64819
  1784.0    0.000561    1430.43591   1537.65527
  1759.0    0.000569    1430.82300   1538.52600
  1750.0    0.000571    1431.20874   1538.24158
  1682.0    0.000595    1431.59509   1536.83032
  1705.0    0.000587    1431.98071   1534.35828
  1737.0    0.000576    1432.36548   1530.92505
  1741.0    0.000574    1432.75024   1526.66003
  1739.0    0.000575    1433.13379   1521.70886
  1727.0    0.000579    1433.51733   1516.22937
  1734.0    0.000577    1433.90015   1510.38123
  1678.0    0.000596    1434.28223   1504.32031
  1706.0    0.000586    1434.66443   1498.19397
  1689.0    0.000592    1435.04480   1492.13330
  1710.0    0.000585    1435.42615   1486.25537
  1704.0    0.000587    1435.80676   1482.47913
  1705.0    0.000587    1436.18628   1477.43811
  1676.0    0.000597    1436.56580   1472.84558
  1634.0    0.000612    1436.94385   1469.60071
  1700.0    0.000588    1437.32263   1466.11890
  1716.0    0.000583    1437.69971   1463.19739
  1646.0    0.000608    1438.07678   1460.85083
  1627.0    0.000615    1438.45325   1459.09424
  1763.0    0.000567    1438.82947   1457.94958
  1660.0    0.000602    1439.20459   1457.45337
  1781.0    0.000561    1439.58008   1457.68018
  1722.0    0.000581    1439.95410   1458.76270
  1629.0    0.000614    1440.32813   1460.96448
  1729.0    0.000578    1440.70117   1464.89258
  1746.0    0.000573    1441.07336   1472.17786
  1763.0    0.000567    1441.44617   1486.98145
  1724.0    0.000580    1441.81775   1517.27087
  1654.0    0.000605    1442.18909   1571.91638
  1704.0    0.000587    1442.55920   1649.18835
  1874.0    0.000534    1442.92944   1712.94568
  1755.0    0.000570    1443.29858   1707.61523
  1839.0    0.000544    1443.66736   1666.22986
  1742.0    0.000574    1444.03589   1639.78076
  1777.0    0.000563    1444.40393   1614.91406
  1671.0    0.000598    1444.77112   1569.67126
  1774.0    0.000564    1445.13770   1524.40173
  1825.0    0.000548    1445.50452   1493.40894
  1804.0    0.000554    1445.86963   1475.97314
  1719.0    0.000582    1446.23450   1467.03430
  1739.0    0.000575    1446.59949   1462.28699
  1734.0    0.000577    1446.96338   1459.44873
  1675.0    0.000597    1447.32666   1457.10400
  1767.0    0.000566    1447.68909   1456.66394
  1705.0    0.000587    1448.05200   1455.87354
  1669.0    0.000599    1448.41321   1455.37085
  1759.0    0.000569    1448.77490   1455.24304
  1655.0    0.000604    1449.13538   1455.18384
  1682.0    0.000595    1449.49573   1455.27820
  1658.0    0.000603    1449.85498   1455.51147
  1757.0    0.000569    1450.21375   1454.16248
  1623.0    0.000616    1450.57239   1454.84473
  1647.0    0.000607    1450.92969   1455.68091
  1668.0    0.000600    1451.28735   1455.81482
  1632.0    0.000613    1451.64368   1457.23718
  1609.0    0.000622    1452.00049   1459.10535
  1605.0    0.000623    1452.35510   1461.79712
  1574.0    0.000635    1452.71021   1466.31689
  1676.0    0.000597    1453.06445   1475.00964
  1597.0    0.000626    1453.41833   1491.75220
  1576.0    0.000635    1453.77209   1519.64917
  1620.0    0.000617    1454.12427   1554.38818
  1568.0    0.000638    1454.47668   1573.95605
  1658.0    0.000603    1454.82800   1562.88452
  1651.0    0.000606    1455.17883   1545.84827
  1558.0    0.000642    1455.52942   1537.00928
  1514.0    0.000661    1455.87939   1525.05908
  1564.0    0.000639    1456.22852   1504.88611
  1549.0    0.000646    1456.57690   1486.82666
  1605.0    0.000623    1456.92517   1475.16614
  1562.0    0.000640    1457.27209   1468.89246
  1574.0    0.000635    1457.61926   1465.78601
  1538.0    0.000650    1457.96582   1464.19238
  1621.0    0.000617    1458.31189   1463.29883
  1629.0    0.000614    1458.65601   1462.77661
  1515.0    0.000660    1459.00098   1462.49011
  1492.0    0.000670    1459.34485   1462.36816
  1558.0    0.000642    1459.68860   1462.37561
  1556.0    0.000643    1460.03149   1462.50049
  1571.0    0.000637    1460.37366   1462.77234
  1521.0    0.000657    1460.71509   1463.28198
  1560.0    0.000641    1461.05603   1463.34839
  1558.0    0.000642    1461.39600   1464.72241
  1530.0    0.000654    1461.73584   1466.14990
  1555.0    0.000643    1462.07495   1466.70386
  1527.0    0.000655    1462.41406   1465.99353
  1516.0    0.000660    1462.75244   1465.81348
  1563.0    0.000640    1463.08972   1465.87439
  1540.0    0.000649    1463.42639   1465.67908
  1477.0    0.000677    1463.76270   1465.28052
  1572.0    0.000636    1464.09875   1465.02930
  1536.0    0.000651    1464.43372   1465.00305
  1533.0    0.000652    1464.76770   1465.14294
  1489.0    0.000672    1465.10156   1465.37439
  1531.0    0.000653    1465.43494   1465.64734
  1487.0    0.000672    1465.76746   1465.93970
  1515.0    0.000660    1466.09985   1466.24341
  1510.0    0.000662    1466.43103   1466.55261
  1503.0    0.000665    1466.76221   1466.86694
  1544.0    0.000648    1467.09216   1467.18396
  1554.0    0.000644    1467.42114   1467.50220
  1472.0    0.000679    1467.75073   1467.82300
  1527.0    0.000655    1468.07959   1468.14441
  1483.0    0.000674    1468.40747   1468.43835
  1582.0    0.000632    1468.73438   1468.76282
  1527.0    0.000655    1469.06152   1469.12708
  1447.0    0.000691    1469.38684   1469.45239
  1532.0    0.000653    1469.71204   1469.76428
  1486.0    0.000673    1470.03699   1470.09119
  1561.0    0.000641    1470.36145   1470.43738
  1546.0    0.000647    1470.68469   1470.84326
  1533.0    0.000652    1471.00806   1471.17334
  1564.0    0.000639    1471.33044   1471.50330
  1459.0    0.000685    1471.65186   1471.83337
  1474.0    0.000678    1471.97302   1472.20361
  1495.0    0.000669    1472.29309   1472.53687
  1543.0    0.000648    1472.61328   1472.87158
  1489.0    0.000672    1472.93225   1473.20752
  1477.0    0.000677    1473.25110   1473.54663
  1545.0    0.000647    1473.56885   1473.88855
  1464.0    0.000683    1473.88611   1474.23535
  1475.0    0.000678    1474.20300   1474.58838
  1474.0    0.000678    1474.51953   1474.94995
  1495.0    0.000669    1474.83472   1475.32129
  1510.0    0.000662    1475.14966   1475.70630
  1525.0    0.000656    1475.46362   1476.10828
  1502.0    0.000666    1475.77734   1476.53113
  1492.0    0.000670    1476.09033   1476.98071
  1535.0    0.000651    1476.40320   1477.46277
  1479.0    0.000676    1476.71423   1477.98230
  1498.0    0.000668    1477.02576   1478.54932
  1407.0    0.000711    1477.33618   1479.16943
  1471.0    0.000680    1477.64600   1479.85217
  1500.0    0.000667    1477.95532   1480.60645
  1442.0    0.000693    1478.26379   1481.44006
  1521.0    0.000657    1478.57166   1482.36133
  1476.0    0.000678    1478.87903   1483.37793
  1477.0    0.000677    1479.18628   1484.49548
  1549.0    0.000646    1479.49194   1485.71716
  1508.0    0.000663    1479.79712   1487.04468
  1418.0    0.000705    1480.10217   1488.47815
  1583.0    0.000632    1480.40613   1490.00964
  1441.0    0.000694    1480.70959   1491.63159
  1493.0    0.000670    1481.01245   1493.33044
  1528.0    0.000654    1481.31482   1495.08813
  1521.0    0.000657    1481.61633   1496.88245
  1559.0    0.000641    1481.91760   1498.68738
  1564.0    0.000639    1482.21753   1500.47229
  1521.0    0.000657    1482.51782   1502.20605
  1591.0    0.000629    1482.81592   1503.85217
  1499.0    0.000667    1483.11450   1505.37769
  1521.0    0.000657    1483.41284   1506.74866
  1478.0    0.000677    1483.70947   1507.93311
  1554.0    0.000644    1484.00635   1508.90527
  1510.0    0.000662    1484.30151   1509.64160
  1475.0    0.000678    1484.59705   1510.12988
  1549.0    0.000646    1484.89111   1510.36096
  1511.0    0.000662    1485.18530   1510.33838
  1527.0    0.000655    1485.47864   1510.07129
  1611.0    0.000621    1485.77100   1509.57629
  1525.0    0.000656    1486.06287   1508.87964
  1469.0    0.000681    1486.35425   1508.01025
  1531.0    0.000653    1486.64502   1507.00134
  1529.0    0.000654    1486.93457   1505.88770
  1493.0    0.000670    1487.22363   1504.70398
  1542.0    0.000649    1487.51282   1503.48657
  1524.0    0.000656    1487.80090   1502.26550
  1499.0    0.000667    1488.08813   1501.06885
  1492.0    0.000670    1488.37427   1499.92163
  1561.0    0.000641    1488.66064   1498.84460
  1483.0    0.000674    1488.94604   1497.85291
  1544.0    0.000648    1489.23083   1496.95715
  1578.0    0.000634    1489.51465   1496.16553
  1538.0    0.000650    1489.79858   1495.48120
  1542.0    0.000649    1490.08093   1494.90332
  1531.0    0.000653    1490.36292   1494.42957
  1515.0    0.000660    1490.64441   1494.05481
  1542.0    0.000649    1490.92517   1493.77234
  1533.0    0.000652    1491.20557   1493.57410
  1484.0    0.000674    1491.48462   1493.45081
  1470.0    0.000680    1491.76404   1493.39502
  1443.0    0.000693    1492.04150   1493.39624
  1557.0    0.000642    1492.31873   1493.44739
  1543.0    0.000648    1492.59595   1493.54053
  1543.0    0.000648    1492.87195   1493.66870
  1515.0    0.000660    1493.14734   1493.82520
  1518.0    0.000659    1493.42212   1494.00464
  1461.0    0.000684    1493.69617   1494.20313
  1466.0    0.000682    1493.96997   1494.41626
  1470.0    0.000680    1494.24194   1494.64001
  1478.0    0.000677    1494.51428   1494.87354
  1442.0    0.000693    1494.78577   1495.11377
  1503.0    0.000665    1495.05713   1495.35889
  1458.0    0.000686    1495.32690   1495.60742
  1545.0    0.000647    1495.59656   1495.85876
  1575.0    0.000635    1495.86499   1496.11182
  1523.0    0.000657    1496.13306   1496.32788
  1552.0    0.000644    1496.40027   1496.58472
  1541.0    0.000649    1496.66736   1496.84265
  1502.0    0.000666    1496.93298   1497.10022
  1464.0    0.000683    1497.19849   1497.33899
  1461.0    0.000684    1497.46362   1497.51819
  1490.0    0.000671    1497.72729   1497.77991
  1541.0    0.000649    1497.99072   1498.04102
  1503.0    0.000665    1498.25281   1498.30151
  1518.0    0.000659    1498.51489   1498.52209
  1518.0    0.000659    1498.77637   1498.78333
  1478.0    0.000677    1499.03687   1499.04419
  1515.0    0.000660    1499.29675   1499.30396
  1409.0    0.000710    1499.55591   1499.56299
  1416.0    0.000706    1499.81482   1499.82178
  1437.0    0.000696    1500.07288   1500.07971
  1487.0    0.000672    1500.32996   1500.33679
  1518.0    0.000659    1500.58667   1500.59338
  1507.0    0.000664    1500.84216   1500.84912
  1541.0    0.000649    1501.09753   1501.10425
  1412.0    0.000708    1501.35217   1501.35913
  1501.0    0.000666    1501.60583   1501.61255
  1487.0    0.000672    1501.85864   1501.86548
  1519.0    0.000658    1502.11096   1502.11780
  1485.0    0.000673    1502.36316   1502.36975
  1552.0    0.000644    1502.61377   1502.62048
  1473.0    0.000679    1502.86438   1502.87109
  1438.0    0.000695    1503.11426   1503.12109
  1533.0    0.000652    1503.36279   1503.36926
  1504.0    0.000665    1503.61072   1503.61743
  1481.0    0.000675    1503.85864   1503.86523
  1467.0    0.000682    1504.10571   1504.11194
  1467.0    0.000682    1504.35168   1504.35815
  1481.0    0.000675    1504.59729   1504.60376
  1464.0    0.000683    1504.84253   1504.84875
  1495.0    0.000669    1505.08618   1505.09241
  1504.0    0.000665    1505.32935   1505.33582
  1468.0    0.000681    1505.57214   1505.57861
  1495.0    0.000669    1505.81470   1505.82080
  1437.0    0.000696    1506.05591   1506.06201
  1526.0    0.000655    1506.29626   1506.30249
  1439.0    0.000695    1506.53662   1506.54297
  1513.0    0.000661    1506.77551   1506.78149
  1447.0    0.000691    1507.01392   1507.01990
  1425.0    0.000702    1507.25171   1507.25781
  1484.0    0.000674    1507.48962   1507.49536
  1463.0    0.000684    1507.72583   1507.73193
  1555.0    0.000643    1507.96143   1507.96716
  1537.0    0.000651    1508.19666   1508.20264
  1486.0    0.000673    1508.43091   1508.43689
  1549.0    0.000646    1508.66443   1508.67017
  1582.0    0.000632    1508.89746   1508.90344
  1514.0    0.000661    1509.12952   1509.13538
  1460.0    0.000685    1509.36121   1509.36694
  1460.0    0.000685    1509.59180   1509.59753
  1462.0    0.000684    1509.82202   1509.82776
  1500.0    0.000667    1510.05212   1510.05762
  1476.0    0.000678    1510.28003   1510.28577
  1581.0    0.000633    1510.50842   1510.51379
  1510.0    0.000662    1510.73621   1510.74146
  1518.0    0.000659    1510.96228   1510.96753
  1466.0    0.000682    1511.18799   1511.19336
  1514.0    0.000661    1511.41321   1511.41858
  1467.0    0.000682    1511.63831   1511.64355
  1477.0    0.000677    1511.86194   1511.86731
  1497.0    0.000668    1512.08459   1512.08984
  1462.0    0.000684    1512.30750   1512.31274
  1575.0    0.000635    1512.52869   1512.53381
  1501.0    0.000666    1512.74939   1512.75464
  1440.0    0.000694    1512.96985   1512.97498
  1525.0    0.000656    1513.18970   1513.19470
  1495.0    0.000669    1513.40833   1513.41345
  1466.0    0.000682    1513.62646   1513.63147
  1472.0    0.000679    1513.84387   1513.84875
  1500.0    0.000667    1514.06055   1514.06531
  1398.0    0.000715    1514.27612   1514.28088
  1560.0    0.000641    1514.49158   1514.49622
  1421.0    0.000704    1514.70642   1514.71130
  1521.0    0.000657    1514.91980   1514.92456
  1493.0    0.000670    1515.13306   1515.13806
  1486.0    0.000673    1515.34546   1515.35034
  1468.0    0.000681    1515.55762   1515.56226
  1508.0    0.000663    1515.76770   1515.77234
  1526.0    0.000655    1515.97803   1515.98267
  1522.0    0.000657    1516.18799   1516.19263
  1574.0    0.000635    1516.39685   1516.40137
  1549.0    0.000646    1516.60449   1516.60913
  1480.0    0.000676    1516.81177   1516.81641
  1452.0    0.000689    1517.01892   1517.02344
  1526.0    0.000655    1517.22449   1517.22900
  1446.0    0.000692    1517.42993   1517.43408
  1493.0    0.000670    1517.63416   1517.63855
  1490.0    0.000671    1517.83789   1517.84241
  1466.0    0.000682    1518.04065   1518.04480
  1479.0    0.000676    1518.24353   1518.24768
  1601.0    0.000625    1518.44507   1518.44897
  1427.0    0.000701    1518.64551   1518.64978
  1505.0    0.000664    1518.84583   1518.85010
  1514.0    0.000661    1519.04504   1519.04907
  1451.0    0.000689    1519.24402   1519.24805
  1501.0    0.000666    1519.44177   1519.44556
  1447.0    0.000691    1519.63940   1519.64319
  1439.0    0.000695    1519.83582   1519.83960
  1531.0    0.000653    1520.03174   1520.03564
  1482.0    0.000675    1520.22644   1520.23010
  1529.0    0.000654    1520.42114   1520.42493
  1517.0    0.000659    1520.61499   1520.61865
  1459.0    0.000685    1520.80762   1520.81116
  1501.0    0.000666    1520.99963   1521.00330
  1536.0    0.000651    1521.19116   1521.19482
  1475.0    0.000678    1521.38159   1521.38513
  1440.0    0.000694    1521.57153   1521.57507
  1461.0    0.000684    1521.76135   1521.76453
  1531.0    0.000653    1521.94971   1521.95325
  1494.0    0.000669    1522.13708   1522.14050
  1547.0    0.000646    1522.32446   1522.32800
  1579.0    0.000633    1522.51086   1522.51453
  1550.0    0.000645    1522.69641   1522.69971
  1512.0    0.000661    1522.88123   1522.88464
  1526.0    0.000655    1523.06506   1523.06824
  1496.0    0.000668    1523.24890   1523.25208
  1548.0    0.000646    1523.43115   1523.43445
  1494.0    0.000669    1523.61292   1523.61621
  1464.0    0.000683    1523.79431   1523.79761
  1492.0    0.000670    1523.97461   1523.97791
  1538.0    0.000650    1524.15417   1524.15784
  1473.0    0.000679    1524.33337   1524.33691
  1563.0    0.000640    1524.51233   1524.51575
  1491.0    0.000671    1524.68909   1524.69275
  1474.0    0.000678    1524.86584   1524.86926
  1472.0    0.000679    1525.04248   1525.04626
  1469.0    0.000681    1525.21765   1525.22144
  1439.0    0.000695    1525.39209   1525.39612
  1510.0    0.000662    1525.56592   1525.57007
  1465.0    0.000683    1525.73938   1525.74377
  1523.0    0.000657    1525.91150   1525.91638
  1505.0    0.000664    1526.08313   1526.08777
  1550.0    0.000645    1526.25391   1526.25891
  1469.0    0.000681    1526.42444   1526.42981
  1427.0    0.000701    1526.59338   1526.59888
  1515.0    0.000660    1526.76221   1526.76819
  1435.0    0.000697    1526.93042   1526.93665
  1591.0    0.000629    1527.09729   1527.10364
  1519.0    0.000658    1527.26367   1527.27014
  1480.0    0.000676    1527.42969   1527.43616
  1453.0    0.000688    1527.59485   1527.60181
  1473.0    0.000679    1527.75854   1528.29688
  1529.0    0.000654    1527.92212   1528.48376
  1488.0    0.000672    1528.08521   1528.67163
  1528.0    0.000654    1528.24719   1528.86060
  1497.0    0.000668    1528.40869   1529.30945
  1473.0    0.000679    1528.56897   1529.51282
  1517.0    0.000659    1528.72900   1529.72021
  1491.0    0.000671    1528.88770   1529.93152
  1536.0    0.000651    1529.04614   1530.14868
  1533.0    0.000652    1529.20361   1530.37415
  1508.0    0.000663    1529.36084   1530.60962
  1439.0    0.000695    1529.51636   1530.85779
  1510.0    0.000662    1529.67175   1531.12427
  1451.0    0.000689    1529.82690   1531.41443
  1495.0    0.000669    1529.98047   1531.73474
  1522.0    0.000657    1530.13342   1532.09497
  1472.0    0.000679    1530.28589   1532.50708
  1509.0    0.000663    1530.43762   1532.98596
  1504.0    0.000665    1530.58826   1533.54871
  1548.0    0.000646    1530.73840   1534.21765
  1473.0    0.000679    1530.88818   1535.01843
  1502.0    0.000666    1531.03662   1535.97900
  1475.0    0.000678    1531.18408   1537.13391
  1464.0    0.000683    1531.33154   1538.52075
  1466.0    0.000682    1531.47803   1540.17896
  1539.0    0.000650    1531.62341   1542.15039
  1511.0    0.000662    1531.76843   1544.47852
  1515.0    0.000660    1531.91272   1547.20447
  1504.0    0.000665    1532.05615   1550.36658
  1431.0    0.000699    1532.19812   1553.99585
  1495.0    0.000669    1532.34033   1558.11755
  1586.0    0.000631    1532.48169   1562.74146
  1469.0    0.000681    1532.62183   1567.86414
  1522.0    0.000657    1532.76135   1573.46619
  1513.0    0.000661    1532.90076   1579.50781
  1498.0    0.000668    1533.03882   1585.92639
  1459.0    0.000685    1533.17590   1592.63977
  1541.0    0.000649    1533.31274   1599.54346
  1493.0    0.000670    1533.44910   1606.51099
  1420.0    0.000704    1533.58398   1613.39697
  1497.0    0.000668    1533.71802   1620.04224
  1541.0    0.000649    1533.85229   1626.27661
  1469.0    0.000681    1533.98535   1631.92419
  1514.0    0.000661    1534.11694   1636.81348
  1538.0    0.000650    1534.24829   1640.78857
  1395.0    0.000717    1534.37891   1643.71704
  1410.0    0.000709    1534.50867   1658.48279
  1512.0    0.000661    1534.63782   1660.52905
  1529.0    0.000654    1534.76624   1661.62231
  1466.0    0.000682    1534.89404   1661.85999
  1471.0    0.000680    1535.02075   1667.47424
  1472.0    0.000679    1535.14697   1667.21179
  1452.0    0.000689    1535.27222   1666.89661
  1510.0    0.000662    1535.39661   1666.94177
  1445.0    0.000692    1535.52014   1667.88562
  1479.0    0.000676    1535.64404   1670.44238
  1533.0    0.000652    1535.76624   1675.60327
  1419.0    0.000705    1535.88757   1684.86060
  1440.0    0.000694    1536.00879   1700.81812
  1484.0    0.000674    1536.12842   1729.14563
  1475.0    0.000678    1536.24792   1783.84436
  1546.0    0.000647    1536.36621   1895.79016
  1583.0    0.000632    1536.48450   2113.93286
  1458.0    0.000686    1536.60181   2476.85596
  1570.0    0.000637    1536.71753   2928.51636
  1452.0    0.000689    1536.83313   3174.70752
  1509.0    0.000663    1536.94812   2980.22290
  1459.0    0.000685    1537.06262   2673.99683
  1475.0    0.000678    1537.17542   2534.25000
  1493.0    0.000670    1537.28809   2530.83789
  1511.0    0.000662    1537.40027   2437.88550
  1541.0    0.000649    1537.51074   2194.34985
  1497.0    0.000668    1537.62073   1957.95874
  1503.0    0.000665    1537.73059   1798.02722
  1469.0    0.000681    1537.83948   1706.70789
  1482.0    0.000675    1537.94751   1657.48999
  1521.0    0.000657    1538.05420   1629.27832
  1485.0    0.000673    1538.16089   1611.06079
  1452.0    0.000689    1538.26672   1598.15955
  1491.0    0.000671    1538.37195   1588.54602
  1495.0    0.000669    1538.47632   1581.16626
  1489.0    0.000672    1538.57971   1575.37708
  1494.0    0.000669    1538.68188   1570.75354
  1511.0    0.000662    1538.78381   1567.00500
  1503.0    0.000665    1538.88538   1563.92664
  1490.0    0.000671    1538.98560   1561.36804
  1434.0    0.000697    1539.08496   1559.22144
  1602.0    0.000624    1539.18384   1557.40369
  1507.0    0.000664    1539.28247   1555.85339
  1568.0    0.000638    1539.37952   1554.52087
  1547.0    0.000646    1539.47644   1553.36951
  1569.0    0.000637    1539.57202   1551.84082
  1566.0    0.000639    1539.66724   1550.98816
  1557.0    0.000642    1539.76184   1550.24170
  1549.0    0.000646    1539.85474   1549.58521
  1522.0    0.000657    1539.94836   1549.00745
  1588.0    0.000630    1540.03992   1540.03809
  1591.0    0.000629    1540.13098   1540.12903
  1615.0    0.000619    1540.22168   1540.21973
  1623.0    0.000616    1540.31213   1540.30969
  1633.0    0.000612    1540.40088   1540.39856
  1556.0    0.000643    1540.48877   1540.48645
  1549.0    0.000646    1540.57666   1540.57446
  1589.0    0.000629    1540.66345   1540.66101
  1529.0    0.000654    1540.74927   1540.74670
  1584.0    0.000631    1540.83459   1540.83215
  1519.0    0.000658    1540.91919   1540.91687
  1432.0    0.000698    1541.00244   1540.99963
  1531.0    0.000653    1541.08545   1541.08289
  1631.0    0.000613    1541.16736   1541.16504
  1517.0    0.000659    1541.24939   1541.24670
  1559.0    0.000641    1541.32922   1541.32666
  1500.0    0.000667    1541.40979   1541.40710
  1505.0    0.000664    1541.48865   1541.48621
  1450.0    0.000690    1541.56689   1541.56409
  1489.0    0.000672    1541.64490   1541.64209
  1430.0    0.000699    1541.72156   1541.71863
  1510.0    0.000662    1541.79822   1541.79529
  1466.0    0.000682    1541.87305   1541.86987
  1517.0    0.000659    1541.94800   1541.94507
  1587.0    0.000630    1542.02185   1542.01880
  1533.0    0.000652    1542.09436   1542.09119
  1472.0    0.000679    1542.16650   1542.16345
  1502.0    0.000666    1542.23877   1542.23547
  1512.0    0.000661    1542.30896   1542.30591
  1485.0    0.000673    1542.37915   1542.37585
  1535.0    0.000651    1542.44836   1542.44507
  1477.0    0.000677    1542.51660   1542.51331
  1484.0    0.000674    1542.58435   1542.58093
  1526.0    0.000655    1542.65137   1542.64795
  1501.0    0.000666    1542.71814   1542.71472
  1475.0    0.000678    1542.78345   1542.78003
  1484.0    0.000674    1542.84741   1542.84387
  1512.0    0.000661    1542.91150   1542.90771
  1418.0    0.000705    1542.97498   1542.97144
  1393.0    0.000718    1543.03711   1543.03333
  1370.0    0.000730    1543.09827   1543.09473
  1522.0    0.000657    1543.15979   1543.15601
  1490.0    0.000671    1543.22034   1543.21631
  1397.0    0.000716    1543.27905   1543.27527
  1435.0    0.000697    1543.33728   1543.33325
  1472.0    0.000679    1543.39539   1543.39148
  1519.0    0.000658    1543.45288   1543.44897
  1440.0    0.000694    1543.50854   1543.50452
  1484.0    0.000674    1543.56445   1543.56030
  1439.0    0.000695    1543.61975   1543.61560
  1469.0    0.000681    1543.67346   1543.66956
  1464.0    0.000683    1543.72644   1543.72217
  1472.0    0.000679    1543.77893   1543.77441
  1464.0    0.000683    1543.83044   1543.82642
  1487.0    0.000672    1543.88171   1543.87744
  1410.0    0.000709    1543.93152   1543.92700
  1454.0    0.000688    1543.98157   1543.97729
  1377.0    0.000726    1544.03027   1544.02563
  1504.0    0.000665    1544.07776   1544.07349
  1461.0    0.000684    1544.12500   1544.12036
  1455.0    0.000687    1544.17212   1544.16724
  1571.0    0.000637    1544.21729   1544.21265
  1495.0    0.000669    1544.26172   1544.25696
  1383.0    0.000723    1544.30640   1544.30164
  1427.0    0.000701    1544.34973   1544.34497
  1431.0    0.000699    1544.39197   1544.38684
  1411.0    0.000709    1544.43384   1544.42896
  1489.0    0.000672    1544.47571   1544.47034
  1442.0    0.000693    1544.51526   1544.51038
  1475.0    0.000678    1544.55457   1544.54944
  1485.0    0.000673    1544.59387   1544.58875
  1420.0    0.000704    1544.63196   1544.62695
  1457.0    0.000686    1544.66907   1544.66394
  1503.0    0.000665    1544.70532   1544.70007
  1406.0    0.000711    1544.74121   1544.73608
  1441.0    0.000694    1544.77649   1544.77112
  1429.0    0.000700    1544.81018   1544.80481
  1395.0    0.000717    1544.84412   1544.83862
  1505.0    0.000664    1544.87671   1544.87134
  1350.0    0.000741    1544.90845   1544.90320
  1441.0    0.000694    1544.94006   1544.93457
  1497.0    0.000668    1544.97009   1544.96436
  1442.0    0.000693    1544.99988   1544.99414
  1478.0    0.000677    1545.02905   1545.02332
  1421.0    0.000704    1545.05725   1545.05151
  1548.0    0.000646    1545.08472   1545.07874
  1383.0    0.000723    1545.11133   1545.10547
  1501.0    0.000666    1545.13696   1545.13098
  1396.0    0.000716    1545.16199   1545.15601
  1438.0    0.000695    1545.18652   1545.18054
  1445.0    0.000692    1545.20972   1545.20374
  1407.0    0.000711    1545.23291   1545.22693
  1475.0    0.000678    1545.25537   1545.24927
  1427.0    0.000701    1545.27625   1545.26990
  1379.0    0.000725    1545.29675   1545.29041
  1417.0    0.000706    1545.31641   1545.31018
  1426.0    0.000701    1545.33569   1545.32947
  1496.0    0.000668    1545.35400   1545.34778
  1396.0    0.000716    1545.37146   1545.36511
  1423.0    0.000703    1545.38855   1545.38208
  1428.0    0.000700    1545.40405   1545.39758
  1493.0    0.000670    1545.41943   1545.41284
  1419.0    0.000705    1545.43408   1554.27417
  1403.0    0.000713    1545.44824   1555.27185
  1444.0    0.000693    1545.46045   1556.44031
  1477.0    0.000677    1545.47327   1557.82410
  1480.0    0.000676    1545.48450   1559.47852
  1453.0    0.000688    1545.49524   1565.87024
  1429.0    0.000700    1545.50537   1568.81055
  1506.0    0.000664    1545.51428   1572.43408
  1420.0    0.000704    1545.52332   1576.97241
  1482.0    0.000675    1545.53064   1582.76086
  1451.0    0.000689    1545.53711   1590.30701
  1496.0    0.000668    1545.54407   1600.41626
  1413.0    0.000708    1545.54944   1614.51111
  1453.0    0.000688    1545.55408   1635.62170
  1413.0    0.000708    1545.55750   1671.13721
  1310.0    0.000763    1545.56165   1737.86389
  1490.0    0.000671    1545.56348   1864.80066
  1463.0    0.000684    1545.56494   2081.65405
  1497.0    0.000668    1545.56592   2375.53833
  1408.0    0.000710    1545.56616   2599.59473
  1468.0    0.000681    1545.56543   2535.94556
  1434.0    0.000697    1545.56409   2313.95435
  1419.0    0.000705    1545.56189   2168.87671
  1410.0    0.000709    1545.55945   2152.54932
  1435.0    0.000697    1545.55579   2174.29297
  1499.0    0.000667    1545.55127   2088.61108
  1370.0    0.000730    1545.54626   1925.80127
  1388.0    0.000720    1545.54016   1786.65833
  1416.0    0.000706    1545.53345   1697.49792
  1454.0    0.000688    1545.52649   1647.87476
  1456.0    0.000687    1545.51843   1621.33240
  1423.0    0.000703    1545.50903   1606.62622
  1438.0    0.000695    1545.49951   1598.80603
  1433.0    0.000698    1545.48950   1596.63525
  1462.0    0.000684    1545.47852   1599.95154
  1445.0    0.000692    1545.46606   1606.79688
  1405.0    0.000712    1545.45374   1609.49377
  1410.0    0.000709    1545.44043   1601.54004
  1489.0    0.000672    1545.42590   1590.69788
  1520.0    0.000658    1545.41125   1575.97095
  1419.0    0.000705    1545.39600   1575.30420
  1465.0    0.000683    1545.37903   1574.96692
  1425.0    0.000702    1545.36218   1570.11707
  1455.0    0.000687    1545.34387   1563.28796
  1383.0    0.000723    1545.32544   1553.68103
  1439.0    0.000695    1545.30615   1550.57520
  1493.0    0.000670    1545.28552   1548.84680
  1447.0    0.000691    1545.26514   1547.88306
  1468.0    0.000681    1545.24377   1547.28833
  1433.0    0.000698    1545.22095   1546.87659
  1408.0    0.000710    1545.19788   1546.56946
  1468.0    0.000681    1545.17383   1546.33032
  1444.0    0.000693    1545.14954   1546.13782
  1415.0    0.000707    1545.12415   1545.97900
  1488.0    0.000672    1545.09790   1545.84448
  1431.0    0.000699    1545.07092   1545.38049
  1417.0    0.000706    1545.04358   1545.31274
  1399.0    0.000715    1545.01501   1545.25110
  1383.0    0.000723    1544.98608   1545.19458
  1509.0    0.000663    1544.95642   1545.14185
  1370.0    0.000730    1544.92517   1544.91602
  1400.0    0.000714    1544.89453   1544.88525
  1475.0    0.000678    1544.86206   1544.85278
  1470.0    0.000680    1544.82898   1544.81970
  1403.0    0.000713    1544.79590   1544.78662
  1388.0    0.000720    1544.76172   1544.75256
  1382.0    0.000724    1544.72620   1544.71704
  1432.0    0.000698    1544.69043   1544.68091
  1379.0    0.000725    1544.65393   1544.64429
  1422.0    0.000703    1544.61707   1544.60754
  1442.0    0.000693    1544.57861   1544.56909
  1406.0    0.000711    1544.54041   1544.53064
  1456.0    0.000687    1544.50110   1544.49133
  1411.0    0.000709    1544.46045   1544.45068
  1449.0    0.000690    1544.41931   1544.40942
  1418.0    0.000705    1544.37744   1544.36768
  1427.0    0.000701    1544.33533   1544.32532
  1429.0    0.000700    1544.29175   1544.28186
  1403.0    0.000713    1544.24792   1544.23804
  1457.0    0.000686    1544.20325   1544.19360
  1450.0    0.000690    1544.15796   1544.14783
  1454.0    0.000688    1544.11157   1544.10156
  1439.0    0.000695    1544.06458   1544.05457
  1359.0    0.000736    1544.01733   1544.00708
  1429.0    0.000700    1543.96851   1543.95837
  1464.0    0.000683    1543.91943   1543.90942
  1457.0    0.000686    1543.86975   1543.85938
  1459.0    0.000685    1543.81946   1543.80920
  1366.0    0.000732    1543.76758   1543.75732
  1416.0    0.000706    1543.71606   1543.70557
  1413.0    0.000708    1543.66333   1543.65295
  1491.0    0.000671    1543.60950   1543.59900
  1389.0    0.000720    1543.55530   1543.54468
  1462.0    0.000684    1543.50037   1543.48975
  1451.0    0.000689    1543.44421   1543.43372
  1416.0    0.000706    1543.38782   1543.37695
  1412.0    0.000708    1543.33069   1543.32019
  1442.0    0.000693    1543.27295   1543.26221
  1430.0    0.000699    1543.21411   1543.20325
  1485.0    0.000673    1543.15442   1543.14380
  1460.0    0.000685    1543.09448   1543.08362
  1425.0    0.000702    1543.03381   1543.02295
  1499.0    0.000667    1542.97192   1542.96082
  1428.0    0.000700    1542.90955   1542.89856
  1396.0    0.000716    1542.84668   1542.83582
  1411.0    0.000709    1542.78271   1542.77173
  1533.0    0.000652    1542.71826   1542.70703
  1418.0    0.000705    1542.65271   1542.64160
  1429.0    0.000700    1542.58679   1542.57581
  1427.0    0.000701    1542.52039   1542.50928
  1439.0    0.000695    1542.45239   1542.44128
  1430.0    0.000699    1542.38489   1542.37354
  1435.0    0.000697    1542.31555   1542.30420
  1450.0    0.000690    1542.24585   1542.23462
  1425.0    0.000702    1542.17603   1542.16431
  1423.0    0.000703    1542.10498   1542.09363
  1493.0    0.000670    1542.03271   1542.02100
  1368.0    0.000731    1541.96008   1541.94873
  1438.0    0.000695    1541.88745   1541.87573
  1421.0    0.000704    1541.81299   1541.80127
  1408.0    0.000710    1541.73853   1550.16553
  1391.0    0.000719    1541.66284   1551.19800
  1488.0    0.000672    1541.58679   1552.23547
  1438.0    0.000695    1541.50989   1553.47974
  1480.0    0.000676    1541.43201   1554.98425
  1497.0    0.000668    1541.35437   1561.10791
  1441.0    0.000694    1541.27502   1563.91638
  1437.0    0.000696    1541.19507   1567.29993
  1480.0    0.000676    1541.11438   1571.55896
  1477.0    0.000677    1541.03345   1577.01733
  1516.0    0.000660    1540.95117   1584.27844
  1361.0    0.000735    1540.86816   1593.89478
  1463.0    0.000684    1540.78516   1607.37537
  1483.0    0.000674    1540.70093   1627.71875
  1453.0    0.000688    1540.61646   1662.13074
  1504.0    0.000665    1540.53076   1726.43506
  1371.0    0.000729    1540.44470   1846.76001
  1451.0    0.000689    1540.35767   2047.80383
  1474.0    0.000678    1540.26965   2313.49561
  1420.0    0.000704    1540.18140   2501.56445
  1374.0    0.000728    1540.09290   2424.73022
  1506.0    0.000664    1540.00269   2215.15698
  1522.0    0.000657    1539.91174   2077.09644
  1417.0    0.000706    1539.82068   2058.99805
  1504.0    0.000665    1539.72864   2099.70630
  1481.0    0.000675    1539.63599   2063.95215
  1476.0    0.000678    1539.54236   1929.38440
  1514.0    0.000661    1539.44885   1794.85242
  1437.0    0.000696    1539.35352   1702.80908
  1450.0    0.000690    1539.25806   1649.86829
  1444.0    0.000693    1539.16162   1621.63550
  1512.0    0.000661    1539.06519   1606.26404
  1456.0    0.000687    1538.96741   1597.31079
  1501.0    0.000666    1538.86841   1591.93738
  1466.0    0.000682    1538.76941   1588.89966
  1554.0    0.000644    1538.66968   1587.55151
  1494.0    0.000669    1538.56897   1587.49438
  1456.0    0.000687    1538.46790   1588.45215
  1424.0    0.000702    1538.36609   1581.50220
  1461.0    0.000684    1538.26343   1584.74060
  1460.0    0.000685    1538.15991   1588.34082
  1470.0    0.000680    1538.05579   1592.17822
  1469.0    0.000681    1537.95117   1596.12781
  1493.0    0.000670    1537.84546   1600.05957
  1473.0    0.000679    1537.73962   1603.84351
  1475.0    0.000678    1537.63281   1607.34839
  1489.0    0.000672    1537.52515   1610.44885
  1514.0    0.000661    1537.41650   1613.02869
  1500.0    0.000667    1537.30786   1614.98706
  1519.0    0.000658    1537.19812   1616.24316
  1486.0    0.000673    1537.08716   1616.73962
  1544.0    0.000648    1536.97620   1616.44836
  1513.0    0.000661    1536.86499   1615.36938
  1484.0    0.000674    1536.75220   1613.52930
  1419.0    0.000705    1536.63879   1610.98206
  1499.0    0.000667    1536.52454   1607.80286
  1464.0    0.000683    1536.41052   1604.08240
  1476.0    0.000678    1536.29504   1599.92383
  1542.0    0.000649    1536.17859   1595.43604
  1465.0    0.000683    1536.06238   1590.73206
  1518.0    0.000659    1535.94470   1585.91858
  1459.0    0.000685    1535.82654   1581.09729
  1485.0    0.000673    1535.70837   1576.35974
  1512.0    0.000661    1535.58838   1571.78101
  1469.0    0.000681    1535.46814   1567.42749
  1432.0    0.000698    1535.34729   1563.34583
  1479.0    0.000676    1535.22571   1559.57178
  1531.0    0.000653    1535.10364   1556.12585
  1504.0    0.000665    1534.98022   1553.01721
  1501.0    0.000666    1534.85693   1550.24451
  1517.0    0.000659    1534.73254   1547.79688
  1516.0    0.000660    1534.60767   1545.65735
  1496.0    0.000668    1534.48145   1543.80286
  1491.0    0.000671    1534.35547   1542.20947
  1569.0    0.000637    1534.22815   1540.84827
  1446.0    0.000692    1534.10046   1539.69214
  1489.0    0.000672    1533.97144   1538.71326
  1539.0    0.000650    1533.84277   1537.88672
  1463.0    0.000684    1533.71240   1537.18726
  1555.0    0.000643    1533.58203   1536.59448
  1575.0    0.000635    1533.45056   1536.08875
  1485.0    0.000673    1533.31909   1535.65491
  1537.0    0.000651    1533.18628   1535.27686
  1503.0    0.000665    1533.05310   1534.94434
  1565.0    0.000639    1532.91919   1534.64783
  1498.0    0.000668    1532.78430   1534.37866
  1548.0    0.000646    1532.64868   1534.13110
  1541.0    0.000649    1532.51282   1533.90100
  1571.0    0.000637    1532.37610   1533.68335
  1565.0    0.000639    1532.23853   1533.47534
  1584.0    0.000631    1532.10071   1533.27527
  1533.0    0.000652    1531.96179   1533.08118
  1556.0    0.000643    1531.82288   1532.72546
  1479.0    0.000676    1531.68201   1532.54590
  1584.0    0.000631    1531.54150   1532.36951
  1571.0    0.000637    1531.40039   1532.19531
  1500.0    0.000667    1531.25830   1531.48157
  1590.0    0.000629    1531.11462   1531.24255
  1528.0    0.000654    1530.97131   1531.09241
  1671.0    0.000598    1530.82739   1530.94263
  1593.0    0.000628    1530.68201   1530.79150
  1589.0    0.000629    1530.53735   1530.52185
  1651.0    0.000606    1530.39124   1530.37561
  1662.0    0.000602    1530.24341   1530.22815
  1606.0    0.000623    1530.09570   1530.08032
  1585.0    0.000631    1529.94800   1529.93262
  1622.0    0.000617    1529.79919   1529.78369
  1650.0    0.000606    1529.64966   1529.63452
  1640.0    0.000610    1529.49890   1529.48364
  1642.0    0.000609    1529.34863   1529.33313
  1636.0    0.000611    1529.19727   1529.18164
  1633.0    0.000612    1529.04431   1529.02893
  1632.0    0.000613    1528.89136   1528.87573
  1715.0    0.000583    1528.73792   1528.72241
  1583.0    0.000632    1528.58325   1528.56775
  1707.0    0.000586    1528.42896   1537.04358
  1693.0    0.000591    1528.27319   1537.26245
  1700.0    0.000588    1528.11719   1537.50793
  1755.0    0.000570    1527.95984   1537.78186
  1698.0    0.000589    1527.80273   1542.41895
  1782.0    0.000561    1527.64453   1542.95593
  1758.0    0.000569    1527.48584   1547.89124
  1756.0    0.000569    1527.32556   1548.75110
  1709.0    0.000585    1527.16577   1549.71582
  1739.0    0.000575    1527.00488   1552.89368
  1835.0    0.000545    1526.84290   1554.23730
  1811.0    0.000552    1526.68091   1555.79358
  1781.0    0.000561    1526.51807   1557.62256
  1769.0    0.000565    1526.35425   1559.80444
  1837.0    0.000544    1526.19019   1562.44592
  1976.0    0.000506    1526.02588   1565.68555
  1897.0    0.000527    1525.86011   1569.69946
  1874.0    0.000534    1525.69421   1574.71680
  1975.0    0.000506    1525.52698   1581.01904
  1984.0    0.000504    1525.35950   1588.95789
  2011.0    0.000497    1525.19165   1598.95837
  2007.0    0.000498    1525.02307   1611.52649
  2149.0    0.000465    1524.85364   1627.25635
  2145.0    0.000466    1524.68335   1646.82825
  2138.0    0.000468    1524.51221   1671.00598
  2200.0    0.000455    1524.34106   1700.62744
  2324.0    0.000430    1524.16931   1736.58179
  2345.0    0.000426    1523.99683   1779.78821
  2408.0    0.000415    1523.82324   1831.15637
  2484.0    0.000403    1523.64917   1891.54663
  2476.0    0.000404    1523.47473   1961.71484
  2642.0    0.000379    1523.29944   2042.25562
  2713.0    0.000369    1523.12329   2133.53857
  2841.0    0.000352    1522.94690   2235.64966
  3038.0    0.0003292   1522.77039   2348.32886
  3044.0    0.0003285   1522.59155   2470.91333
  3217.0    0.0003108   1522.41370   2602.30811
  3317.0    0.0003015   1522.23425   2740.93872
  3679.0    0.0002718   1522.05444   2884.75562
  3941.0    0.0002537   1521.87415   3031.23389
  4142.0    0.0002414   1521.69324   3177.40869
  4281.0    0.0002336   1521.51147   3319.94214
  4670.0    0.0002141   1521.32959   3455.21875
  5018.0    0.0001993   1521.14624   3579.49829
  5114.0    0.0001955   1520.96252   3689.09644
  5434.0    0.0001840   1520.77881   3780.60449
  5661.0    0.0001766   1520.59351   3851.09644
  5655.0    0.0001768   1520.40833   3898.31616
  5822.0    0.0001718   1520.22253   3920.79443
  5903.0    0.0001694   1520.03503   3917.91504
  6056.0    0.0001651   1519.84802   3889.92090
  5781.0    0.0001730   1519.65991   3852.36572
  5725.0    0.0001747   1519.47119   3779.24756
  5489.0    0.0001822   1519.28174   3686.50562
  5519.0    0.0001812   1519.09204   3577.12549
  5229.0    0.0001912   1518.90173   3454.44336
  5005.0    0.0001998   1518.71094   3328.73901
  4872.0    0.0002053   1518.51855   3190.55176
  4537.0    0.0002204   1518.32629   3049.62305
  4263.0    0.0002346   1518.13318   2909.16870
  4122.0    0.0002426   1517.93933   2772.08203
  3994.0    0.0002504   1517.74548   2640.88281
  3801.0    0.0002631   1517.55066   2517.68091
  3716.0    0.0002691   1517.35474   2404.19067
  3702.0    0.0002701   1517.15869   2301.76514
  3449.0    0.0002899   1516.96191   2211.46631
  3398.0    0.0002943   1516.76453   2134.17285
  3228.0    0.0003098   1516.56653   2070.73047
  3147.0    0.0003178   1516.36816   2022.18542
  2965.0    0.0003373   1516.16870   1990.17737
  2946.0    0.0003394   1515.96899   1977.81091
  3003.0    0.0003330   1515.76807   1992.08984
  2925.0    0.0003419   1515.56702   2050.31396
  2855.0    0.0003503   1515.36523   2191.82031
  2737.0    0.000365    1515.16296   2485.99854
  2682.0    0.000373    1514.95984   3010.46655
  2644.0    0.000378    1514.75671   3762.75977
  2691.0    0.000372    1514.55225   4433.28223
  2591.0    0.000386    1514.34741   4388.26074
  2559.0    0.000391    1514.14246   3749.07642
  2560.0    0.000391    1513.93677   3188.70361
  2493.0    0.000401    1513.72974   2976.77441
  2526.0    0.000396    1513.52197   3075.86914
  2430.0    0.000412    1513.31433   3218.36011
  2431.0    0.000411    1513.10608   3033.61279
  2436.0    0.000411    1512.89673   2608.34644
  2368.0    0.000422    1512.68726   2228.45435
  2394.0    0.000418    1512.47705   1976.65002
  2410.0    0.000415    1512.26648   1830.53833
  2374.0    0.000421    1512.05493   1748.32898
  2377.0    0.000421    1511.84253   1698.85828
  2365.0    0.000423    1511.62988   1657.20691
  2265.0    0.000442    1511.41724   1633.48987
  2266.0    0.000441    1511.20239   1615.46826
  2169.0    0.000461    1510.98853   1601.35754
  2241.0    0.000446    1510.77332   1585.86169
  2201.0    0.000454    1510.55762   1576.80188
  2236.0    0.000447    1510.34180   1565.09753
  2269.0    0.000441    1510.12500   1558.97314
  2207.0    0.000453    1509.90686   1553.78333
  2218.0    0.000451    1509.68909   1547.18201
  2189.0    0.000457    1509.47046   1543.42456
  2233.0    0.000448    1509.25146   1540.15063
  2148.0    0.000466    1509.03162   1537.27490
  2107.0    0.000475    1508.81091   1520.44019
  2177.0    0.000459    1508.59009   1519.18347
  2170.0    0.000461    1508.36914   1518.05823
  2100.0    0.000476    1508.14636   1517.04199
  2052.0    0.000487    1507.92334   1516.11865
  2085.0    0.000480    1507.70007   1515.27405
  2152.0    0.000465    1507.47595   1507.45740
  1946.0    0.000514    1507.25159   1507.23303
  2011.0    0.000497    1507.02686   1507.00818
  2004.0    0.000499    1506.80078   1506.78235
  2046.0    0.000489    1506.57471   1506.55652
  1942.0    0.000515    1506.34790   1518.12073
  1945.0    0.000514    1506.12024   1518.83081
  1892.0    0.000529    1505.89258   1519.65698
  1897.0    0.000527    1505.66357   1520.61792
  1868.0    0.000535    1505.43457   1521.73950
  1913.0    0.000523    1505.20471   1523.05090
  1901.0    0.000526    1504.97412   1530.43567
  1885.0    0.000531    1504.74377   1532.71350
  1844.0    0.000542    1504.51221   1535.38208
  1887.0    0.000530    1504.28003   1538.52905
  1875.0    0.000533    1504.04724   1542.26672
  1846.0    0.000542    1503.81433   1546.74133
  1877.0    0.000533    1503.58032   1552.14905
  1739.0    0.000575    1503.34583   1558.75525
  1755.0    0.000570    1503.11133   1566.92712
  1803.0    0.000555    1502.87598   1577.18140
  1908.0    0.000524    1502.63940   1590.26831
  1790.0    0.000559    1502.40283   1607.31042
  1780.0    0.000562    1502.16589   1630.06885
  1748.0    0.000572    1501.92786   1661.59558
  1730.0    0.000578    1501.68921   1708.11243
  1753.0    0.000570    1501.45068   1783.95630
  1783.0    0.000561    1501.21155   1920.58337
  1682.0    0.000595    1500.97070   2172.68311
  1741.0    0.000574    1500.73071   2601.67578
  1711.0    0.000584    1500.48987   3208.26929
  1731.0    0.000578    1500.24780   3755.84375
  1678.0    0.000596    1500.00562   3742.70630
  1760.0    0.000568    1499.76270   3241.60718
  1697.0    0.000589    1499.51929   2784.09009
  1699.0    0.000589    1499.27625   2593.99121
  1608.0    0.000622    1499.03076   2659.22998
  1681.0    0.000595    1498.78577   2807.27930
  1666.0    0.000600    1498.54077   2734.14819
  1698.0    0.000589    1498.29431   2419.37402
  1662.0    0.000602    1498.04736   2102.62524
  1624.0    0.000616    1497.80017   1882.60669
  1736.0    0.000576    1497.55273   1752.00610
  1718.0    0.000582    1497.30408   1678.67053
  1628.0    0.000614    1497.05518   1635.62463
  1685.0    0.000593    1496.80627   1607.65894
  1664.0    0.000601    1496.55627   1587.79468
  1675.0    0.000597    1496.30518   1572.89526
  1666.0    0.000600    1496.05420   1561.34473
  1600.0    0.000625    1495.80261   1552.17383
  1745.0    0.000573    1495.55005   1544.74841
  1694.0    0.000590    1495.29785   1538.63501
  1682.0    0.000595    1495.04480   1533.52686
  1659.0    0.000603    1494.79028   1529.20313
  1651.0    0.000606    1494.53638   1525.50220
  1711.0    0.000584    1494.28113   1524.39282
  1650.0    0.000606    1494.02612   1521.76416
  1740.0    0.000575    1493.77014   1519.48926
  1640.0    0.000610    1493.51355   1505.84192
  1785.0    0.000560    1493.25647   1504.95435
  1721.0    0.000581    1492.99915   1504.21155
  1713.0    0.000584    1492.74097   1504.62817
  1673.0    0.000598    1492.48267   1504.22644
  1716.0    0.000583    1492.22314   1503.95959
  1594.0    0.000627    1491.96326   1498.00269
  1725.0    0.000580    1491.70337   1498.44299
  1782.0    0.000561    1491.44275   1499.01196
  1784.0    0.000561    1491.18103   1499.74438
  1753.0    0.000570    1490.91895   1500.68726
  1782.0    0.000561    1490.65674   1501.90479
  1778.0    0.000562    1490.39441   1503.64795
  1728.0    0.000579    1490.13098   1505.73364
  1744.0    0.000573    1489.86719   1508.51196
  1813.0    0.000552    1489.60266   1512.29041
  1782.0    0.000561    1489.33777   1517.59985
  1812.0    0.000552    1489.07190   1525.51550
  1833.0    0.000546    1488.80591   1538.57727
  1822.0    0.000549    1488.53979   1561.99561
  1717.0    0.000582    1488.27234   1605.18091
  1785.0    0.000560    1488.00488   1678.75500
  1713.0    0.000584    1487.73743   1783.40771
  1751.0    0.000571    1487.46875   1879.94336
  1742.0    0.000574    1487.19983   1881.14368
  1743.0    0.000574    1486.92981   1794.31262
  1740.0    0.000575    1486.65991   1711.64954
  1744.0    0.000573    1486.38928   1674.13843
  1674.0    0.000597    1486.11829   1681.96655
  1780.0    0.000562    1485.84619   1710.38965
  1724.0    0.000580    1485.57446   1708.04565
  1684.0    0.000594    1485.30164   1657.99805
  1679.0    0.000596    1485.02808   1600.82043
  1679.0    0.000596    1484.75488   1559.19983
  1746.0    0.000573    1484.48047   1533.88965
  1687.0    0.000593    1484.20618   1519.62061
  1646.0    0.000608    1483.93115   1511.41809
  1749.0    0.000572    1483.65564   1506.29663
  1727.0    0.000579    1483.37927   1502.84448
  1727.0    0.000579    1483.10229   1500.43750
  1609.0    0.000622    1482.82507   1498.76929
  1684.0    0.000594    1482.54761   1497.66467
  1634.0    0.000612    1482.26929   1497.01257
  1708.0    0.000585    1481.99060   1496.73730
  1713.0    0.000584    1481.71155   1496.78516
  1775.0    0.000563    1481.43201   1497.11279
  1641.0    0.000609    1481.15161   1497.68542
  1719.0    0.000582    1480.87134   1498.46716
  1667.0    0.000600    1480.58984   1499.42346
  1624.0    0.000616    1480.30859   1500.51782
  1708.0    0.000585    1480.02625   1499.62634
  1669.0    0.000599    1479.74329   1501.01636
  1656.0    0.000604    1479.46082   1502.39612
  1745.0    0.000573    1479.17749   1503.71399
  1634.0    0.000612    1478.89331   1504.91980
  1694.0    0.000590    1478.60901   1505.96130
  1650.0    0.000606    1478.32349   1506.78967
  1731.0    0.000578    1478.03796   1506.38721
  1711.0    0.000584    1477.75220   1506.74023
  1793.0    0.000558    1477.46582   1506.77710
  1666.0    0.000600    1477.17871   1506.48999
  1713.0    0.000584    1476.89124   1505.88330
  1687.0    0.000593    1476.60413   1504.97168
  1672.0    0.000598    1476.31506   1503.77747
  1726.0    0.000579    1476.02649   1502.33179
  1579.0    0.000633    1475.73718   1500.67249
  1699.0    0.000589    1475.44763   1498.84082
  1635.0    0.000612    1475.15674   1496.88037
  1725.0    0.000580    1474.86646   1494.83838
  1668.0    0.000600    1474.57507   1492.75720
  1607.0    0.000622    1474.28296   1490.67761
  1628.0    0.000614    1473.99072   1488.63599
  1631.0    0.000613    1473.69873   1486.66284
  1680.0    0.000595    1473.40564   1484.78052
  1622.0    0.000617    1473.11255   1483.00928
  1611.0    0.000621    1472.81812   1481.35925
  1552.0    0.000644    1472.52344   1479.83862
  1617.0    0.000618    1472.22864   1478.44922
  1604.0    0.000623    1471.93347   1477.18970
  1572.0    0.000636    1471.63770   1476.05432
  1560.0    0.000641    1471.34131   1475.03503
  1616.0    0.000619    1471.04407   1474.12280
  1642.0    0.000609    1470.74707   1473.30774
  1541.0    0.000649    1470.44971   1472.57898
  1585.0    0.000631    1470.15173   1471.92419
  1589.0    0.000629    1469.85266   1471.33350
  1565.0    0.000639    1469.55420   1470.79724
  1477.0    0.000677    1469.25488   1470.30640
  1552.0    0.000644    1468.95447   1469.85181
  1534.0    0.000652    1468.65430   1469.42834
  1546.0    0.000647    1468.35291   1469.02844
  1553.0    0.000644    1468.05200   1468.64795
  1510.0    0.000662    1467.74976   1468.28210
  1460.0    0.000685    1467.44800   1467.92871
  1590.0    0.000629    1467.14526   1467.58362
  1514.0    0.000661    1466.84253   1467.24573
  1504.0    0.000665    1466.53857   1466.91272
  1470.0    0.000680    1466.23486   1466.58386
  1506.0    0.000664    1465.93054   1466.25769
  1501.0    0.000666    1465.62622   1465.93420
  1492.0    0.000670    1465.32031   1465.61157
  1535.0    0.000651    1465.01465   1465.29077
  1519.0    0.000658    1464.70862   1464.97058
  1505.0    0.000664    1464.40222   1464.49011
  1471.0    0.000680    1464.09521   1464.17798
  1517.0    0.000659    1463.78748   1463.86536
  1479.0    0.000676    1463.47986   1463.55334
  1487.0    0.000672    1463.17090   1463.24084
  1501.0    0.000666    1462.86279   1462.92834
  1505.0    0.000664    1462.55359   1462.53418
  1475.0    0.000678    1462.24402   1462.22473
  1461.0    0.000684    1461.93359   1461.91443
  1486.0    0.000673    1461.62378   1461.60474
  1500.0    0.000667    1461.31250   1461.29346
  1503.0    0.000665    1461.00122   1460.98193
  1486.0    0.000673    1460.68958   1460.67053
  1524.0    0.000656    1460.37769   1460.35852
  1448.0    0.000691    1460.06482   1460.04565
  1423.0    0.000703    1459.75183   1459.73267
  1384.0    0.000723    1459.43872   1459.41956
  1415.0    0.000707    1459.12451   1459.10522
  1442.0    0.000693    1458.81030   1458.79102
  1528.0    0.000654    1458.49573   1458.47656
  1446.0    0.000692    1458.18103   1458.16187
  1427.0    0.000701    1457.86560   1457.84668
  1477.0    0.000677    1457.54932   1457.53027
  1440.0    0.000694    1457.23315   1457.21423
  1421.0    0.000704    1456.91614   1456.89722
  1389.0    0.000720    1456.59912   1456.58020
  1487.0    0.000672    1456.28186   1456.26294
  1494.0    0.000669    1455.96436   1455.94531
  1454.0    0.000688    1455.64539   1455.62646
  1383.0    0.000723    1455.32678   1455.30811
  1446.0    0.000692    1455.00781   1454.98901
  1477.0    0.000677    1454.68799   1454.66919
  1443.0    0.000693    1454.36792   1454.34912
  1444.0    0.000693    1454.04749   1454.02881
  1401.0    0.000714    1453.72717   1453.70837
  1433.0    0.000698    1453.40601   1453.38733
  1392.0    0.000718    1453.08386   1453.06555
  1410.0    0.000709    1452.76233   1452.74402
  1444.0    0.000693    1452.43994   1452.42163
  1388.0    0.000720    1452.11694   1452.09888
  1388.0    0.000720    1451.79419   1451.77637
  1470.0    0.000680    1451.47058   1451.45300
  1416.0    0.000706    1451.14661   1451.12903
  1416.0    0.000706    1450.82239   1450.80530
  1452.0    0.000689    1450.49756   1450.48083
  1401.0    0.000714    1450.17261   1450.15613
  1448.0    0.000691    1449.84753   1449.83093
  1397.0    0.000716    1449.52100   1449.50525
  1420.0    0.000704    1449.19507   1449.17957
  1406.0    0.000711    1448.86865   1448.85364
  1467.0    0.000682    1448.54150   1448.52637
  1382.0    0.000724    1448.21387   1448.19934
  1459.0    0.000685    1447.88660   1447.87231
  1421.0    0.000704    1447.55847   1447.54468
  1431.0    0.000699    1447.22998   1447.21655
  1383.0    0.000723    1446.90125   1446.88794
  1456.0    0.000687    1446.57166   1446.55884
  1410.0    0.000709    1446.24207   1446.22949
  1383.0    0.000723    1445.91223   1445.89917
  1395.0    0.000717    1445.58167   1445.56848
  1357.0    0.000737    1445.25073   1445.23792
  1440.0    0.000694    1444.91956   1444.90649
  1420.0    0.000704    1444.58826   1444.57507
  1411.0    0.000709    1444.25659   1444.24304
  1378.0    0.000726    1443.92432   1443.91052
  1412.0    0.000708    1443.59143   1443.57739
  1437.0    0.000696    1443.25891   1443.24463
  1495.0    0.000669    1442.92529   1442.91064
  1399.0    0.000715    1442.59131   1442.57642
  1376.0    0.000727    1442.25781   1442.24268
  1377.0    0.000726    1441.92346   1441.90808
  1439.0    0.000695    1441.58826   1441.57239
  1375.0    0.000727    1441.25366   1441.23718
  1471.0    0.000680    1440.91797   1440.90161
  1352.0    0.000740    1440.58179   1440.56519
  1427.0    0.000701    1440.24585   1440.22888
  1414.0    0.000707    1439.90918   1439.89233
  1432.0    0.000698    1439.57251   1439.55518
  1468.0    0.000681    1439.23474   1439.21729
  1361.0    0.000735    1438.89771   1438.88013
  1416.0    0.000706    1438.55994   1438.54224
  1449.0    0.000690    1438.22131   1438.20349
  1492.0    0.000670    1437.88245   1437.86487
  1448.0    0.000691    1437.54346   1437.52576
  1455.0    0.000687    1437.20483   1437.18665
  1396.0    0.000716    1436.86499   1436.84692
  1437.0    0.000696    1436.52441   1436.50659
  1450.0    0.000690    1436.18433   1436.16663
  1448.0    0.000691    1435.84424   1435.82629
  1431.0    0.000699    1435.50256   1435.48474
  1468.0    0.000681    1435.16113   1435.14294
  1491.0    0.000671    1434.81970   1434.80151
  1422.0    0.000703    1434.47742   1434.45923
  1436.0    0.000696    1434.13513   1434.11719
  1464.0    0.000683    1433.79260   1433.77454
  1408.0    0.000710    1433.44934   1433.43140
  1471.0    0.000680    1433.10596   1433.12219
  1495.0    0.000669    1432.76233   1432.78125
  1367.0    0.000732    1432.41785   1432.43994
  1390.0    0.000719    1432.07385   1432.09900
  1433.0    0.000698    1431.72913   1431.75806
  1376.0    0.000727    1431.38440   1431.41760
  1438.0    0.000695    1431.03918   1431.07703
  1428.0    0.000700    1430.69299   1430.75391
  1423.0    0.000703    1430.34741   1430.41589
  1478.0    0.000677    1430.00085   1430.07874
  1399.0    0.000715    1429.65430   1429.74268
  1374.0    0.000728    1429.30737   1429.40771
  1414.0    0.000707    1428.95984   1429.07507
  1426.0    0.000701    1428.61243   1428.74487
  1486.0    0.000673    1428.26465   1428.41809
  1352.0    0.000740    1427.91638   1428.09607
  1407.0    0.000711    1427.56763   1427.78003
  1412.0    0.000708    1427.21912   1427.47241
  1459.0    0.000685    1426.86975   1427.17676
  1483.0    0.000674    1426.52039   1426.89868
  1404.0    0.000712    1426.17065   1426.64844
  1401.0    0.000714    1425.82043   1426.44495
  1443.0    0.000693    1425.47009   1426.33386
  1431.0    0.000699    1425.11951   1426.40625
  1494.0    0.000669    1424.76855   1426.81238
  1532.0    0.000653    1424.41748   1427.70679
  1489.0    0.000672    1424.06555   1429.05908
  1413.0    0.000708    1423.71423   1430.15210
  1525.0    0.000656    1423.36157   1429.63306
  1450.0    0.000690    1423.00928   1427.81458
  1423.0    0.000703    1422.65613   1426.10388
  1483.0    0.000674    1422.30347   1425.06873
  1550.0    0.000645    1421.94971   1424.73242
  1481.0    0.000675    1421.59607   1424.87463
  1516.0    0.000660    1421.24255   1424.90308
  1546.0    0.000647    1420.88794   1424.12512
  1429.0    0.000700    1420.53369   1422.85498
  1473.0    0.000679    1420.17871   1421.69470
  1495.0    0.000669    1419.82361   1423.41846
  1545.0    0.000647    1419.46826   1422.85901
  1550.0    0.000645    1419.11243   1422.44153
  1529.0    0.000654    1418.75684   1422.38867
  1589.0    0.000629    1418.40076   1422.12048
  1516.0    0.000660    1418.04346   1421.88525
  1533.0    0.000652    1417.68726   1426.72046
  1567.0    0.000638    1417.33008   1428.06091
  1630.0    0.000613    1416.97241   1428.19800
  1602.0    0.000624    1416.61462   1428.38684
  1558.0    0.000642    1416.25720   1428.77844
  1594.0    0.000627    1415.89893   1429.11072
  1671.0    0.000598    1415.54016   1429.53125
  1615.0    0.000619    1415.18152   1432.57153
  1649.0    0.000606    1414.82227   1433.34851
  1693.0    0.000591    1414.46350   1434.31079
  1666.0    0.000600    1414.10388   1435.47388
  1589.0    0.000629    1413.74390   1436.97656
  1730.0    0.000578    1413.38379   1438.86877
  1759.0    0.000569    1413.02307   1441.26221
  1760.0    0.000568    1412.66272   1444.30237
  1764.0    0.000567    1412.30164   1448.17297
  1713.0    0.000584    1411.94092   1453.11536
  1821.0    0.000549    1411.57947   1459.44116
  1805.0    0.000554    1411.21741   1467.68018
  1719.0    0.000582    1410.85547   1478.63208
  1795.0    0.000557    1410.49402   1493.59155
  1796.0    0.000557    1410.13086   1514.21143
  1906.0    0.000525    1409.76855   1541.65942
  1846.0    0.000542    1409.40564   1573.99609
  1880.0    0.000532    1409.04211   1602.21777
  1953.0    0.000512    1408.67883   1620.74304
  1987.0    0.000503    1408.31543   1639.56348
  2076.0    0.000482    1407.95105   1667.07080
  2067.0    0.000484    1407.58679   1705.40430
  2105.0    0.000475    1407.22278   1753.77283
  2252.0    0.000444    1406.85754   1809.72607
  2292.0    0.000436    1406.49292   1867.45508
  2359.0    0.000424    1406.12744   1923.66064
  2403.0    0.000416    1405.76221   1982.57446
  2470.0    0.000405    1405.39661   2046.84814
  2563.0    0.000390    1405.03064   2115.95068
  2620.0    0.000382    1404.66443   2187.99316
  2743.0    0.000365    1404.29822   2260.97095
  2950.0    0.0003390   1403.93164   2332.86597
  2950.0    0.0003390   1403.56445   2401.84204
  3046.0    0.0003283   1403.19751   2466.25366
  3038.0    0.0003292   1402.82996   2524.45166
  3151.0    0.0003174   1402.46277   2574.85425
  3179.0    0.0003146   1402.09485   2615.98730
  3252.0    0.0003075   1401.72717   2646.53931
  3175.0    0.0003150   1401.35864   2665.44019
  3117.0    0.0003208   1400.99011   2672.03906
  3160.0    0.0003165   1400.62170   2666.13721
  3037.0    0.0003293   1400.25220   2647.96240
  3046.0    0.0003283   1399.88330   2618.16284
  2901.0    0.0003447   1399.51379   2577.73242
  2913.0    0.0003433   1399.14417   2527.92114
  2742.0    0.000365    1398.77429   2470.15308
  2729.0    0.000366    1398.40466   2405.96362
  2608.0    0.000383    1398.03418   2336.95557
  2507.0    0.000399    1397.66357   2264.76563
  2442.0    0.000410    1397.29309   2191.01465
  2326.0    0.000430    1396.92236   2117.24219
  2327.0    0.000430    1396.55103   2044.85437
  2204.0    0.000454    1396.17993   1975.07043
  2179.0    0.000459    1395.80811   1908.89063
  2146.0    0.000466    1395.43677   1847.08740
  2094.0    0.000478    1395.06458   1790.20142
  1953.0    0.000512    1394.69214   1738.56201
  1954.0    0.000512    1394.31970   1692.30322
  2000.0    0.000500    1393.94739   1651.39197
  1887.0    0.000530    1393.57446   1615.65405
  1919.0    0.000521    1393.20142   1584.80286
  1850.0    0.000541    1392.82837   1558.46948
  1744.0    0.000573    1392.45532   1536.22412
  1779.0    0.000562    1392.08179   1517.60461
  1829.0    0.000547    1391.70764   1502.13477
  1717.0    0.000582    1391.33386   1489.34741
  1719.0    0.000582    1390.95996   1478.79517
  1667.0    0.000600    1390.58496   1471.87500
  1656.0    0.000604    1390.21094   1464.74915
  1673.0    0.000598    1389.83618   1458.77979
  1602.0    0.000624    1389.46130   1453.70068
  1621.0    0.000617    1389.08557   1449.29541
  1673.0    0.000598    1388.71069   1445.39319
  1613.0    0.000620    1388.33533   1441.86340
  1619.0    0.000618    1387.95947   1439.50244
  1548.0    0.000646    1387.58386   1436.54382
  1520.0    0.000658    1387.20752   1433.78186
  1590.0    0.000629    1386.83142   1431.21033
  1534.0    0.000652    1386.45471   1426.19495
  1573.0    0.000636    1386.07813   1424.17114
  1543.0    0.000648    1385.70178   1422.42725
  1599.0    0.000625    1385.32422   1421.03076
  1502.0    0.000666    1384.94714   1420.07495
  1558.0    0.000642    1384.56995   1419.68616
  1506.0    0.000664    1384.19299   1420.04749
  1485.0    0.000673    1383.81494   1415.08337
  1508.0    0.000663    1383.43701   1418.25671
  1528.0    0.000654    1383.05920   1424.00647
  1520.0    0.000658    1382.68103   1434.42505
  1540.0    0.000649    1382.30273   1453.96387
  1500.0    0.000667    1381.92407   1489.49695
  1488.0    0.000672    1381.54553   1547.80078
  1513.0    0.000661    1381.16638   1623.78467
  1488.0    0.000672    1380.78784   1686.98352
  1452.0    0.000689    1380.40845   1673.96753
  1516.0    0.000660    1380.02942   1603.75720
  1457.0    0.000686    1379.64978   1539.47473
  1477.0    0.000677    1379.26978   1505.24219
  1429.0    0.000700    1378.89038   1502.16235
  1428.0    0.000700    1378.51038   1522.91016
  1405.0    0.000712    1378.13025   1547.32629
  1422.0    0.000703    1377.75012   1540.63098
  1530.0    0.000654    1377.36963   1501.63782
  1469.0    0.000681    1376.98914   1460.85791
  1485.0    0.000673    1376.60840   1431.61230
  1402.0    0.000713    1376.22754   1413.53552
  1374.0    0.000728    1375.84656   1402.95898
  1404.0    0.000712    1375.46533   1396.61255
  1465.0    0.000683    1375.08374   1392.54370
  1446.0    0.000692    1374.70288   1389.87305
  1477.0    0.000677    1374.32117   1388.32959
  1351.0    0.000740    1373.93921   1387.92249
  1384.0    0.000723    1373.55750   1388.51001
  1372.0    0.000729    1373.17590   1389.72083
  1448.0    0.000691    1372.79358   1389.45215
  1404.0    0.000712    1372.41125   1386.67798
  1436.0    0.000696    1372.02905   1383.27161
  1354.0    0.000739    1371.64600   1380.78125
  1405.0    0.000712    1371.26379   1379.38855
  1361.0    0.000735    1370.88074   1378.92712
  1343.0    0.000745    1370.49768   1379.12585
  1335.0    0.000749    1370.11475   1378.94727
  1387.0    0.000721    1369.73120   1377.51062
  1435.0    0.000697    1369.34814   1374.05640
  1432.0    0.000698    1368.96484   1372.39185
  1403.0    0.000713    1368.58118   1371.15808
  1374.0    0.000728    1368.19739   1370.23755
  1332.0    0.000751    1367.81348   1368.63062
  1289.0    0.000776    1367.42981   1368.08484
  1320.0    0.000758    1367.04565   1367.59290
  1297.0    0.000771    1366.66150   1367.13306
  1289.0    0.000776    1366.27710   1366.69336
  1349.0    0.000741    1365.89246   1366.26782
  1356.0    0.000737    1365.50818   1365.85425
  1348.0    0.000742    1365.12329   1365.44934
  1384.0    0.000723    1364.73853   1365.05249
  1370.0    0.000730    1364.35388   1364.66333
  1306.0    0.000766    1363.96875   1364.28149
  1336.0    0.000749    1363.58386   1363.90820
  1299.0    0.000770    1363.19812   1363.54395
  1354.0    0.000739    1362.81287   1363.19116
  1407.0    0.000711    1362.42773   1362.79663
  1332.0    0.000751    1362.04236   1362.48145
  1262.0    0.000792    1361.65637   1362.19080
  1312.0    0.000762    1361.27063   1361.92676
  1293.0    0.000773    1360.88477   1361.67944
  1320.0    0.000758    1360.49866   1361.42151
  1324.0    0.000755    1360.11279   1361.14978
  1279.0    0.000782    1359.72693   1360.86853
  1414.0    0.000707    1359.34070   1360.65503
  1331.0    0.000751    1358.95398   1360.48071
  1333.0    0.000750    1358.56763   1360.34326
  1376.0    0.000727    1358.18140   1360.23535
  1368.0    0.000731    1357.79431   1360.13782
  1382.0    0.000724    1357.40796   1360.03845
  1345.0    0.000743    1357.02136   1359.94324
  1393.0    0.000718    1356.63403   1359.85754
  1317.0    0.000759    1356.24707   1359.77661
  1342.0    0.000745    1355.86047   1359.69177
  1275.0    0.000784    1355.47290   1359.59106
  1290.0    0.000775    1355.08630   1359.46619
  1290.0    0.000775    1354.69861   1359.30627
  1317.0    0.000759    1354.31152   1359.10425
  1378.0    0.000726    1353.92407   1358.85303
  1336.0    0.000749    1353.53601   1358.54785
  1254.0    0.000797    1353.14880   1358.18860
  1317.0    0.000759    1352.76099   1357.77368
  1364.0    0.000733    1352.37305   1357.30579
  1308.0    0.000765    1351.98547   1356.78906
  1320.0    0.000758    1351.59766   1356.22729
  1284.0    0.000779    1351.20935   1355.62585
  1343.0    0.000745    1350.82166   1354.99194
  1283.0    0.000779    1350.43311   1354.33130
  1297.0    0.000771    1350.04517   1353.65210
  1239.0    0.000807    1349.65662   1353.06470
  1334.0    0.000750    1349.26880   1352.37830
  1343.0    0.000745    1348.87988   1351.69531
  1317.0    0.000759    1348.49146   1351.02197
  1308.0    0.000765    1348.10339   1350.36389
  1327.0    0.000754    1347.71472   1349.72375
  1276.0    0.000784    1347.32568   1349.10474
  1324.0    0.000755    1346.93713   1348.50952
  1363.0    0.000734    1346.54846   1347.99280
  1327.0    0.000754    1346.15942   1347.45215
  1255.0    0.000797    1345.77039   1346.93750
  1329.0    0.000752    1345.38184   1346.44958
  1311.0    0.000763    1344.99255   1345.98767
  1277.0    0.000783    1344.60376   1345.55249
  1274.0    0.000785    1344.21472   1345.14380
  1305.0    0.000766    1343.82568   1344.76453
  1319.0    0.000758    1343.43652   1344.41711
  1233.0    0.000811    1343.04724   1344.10669
  1200.0    0.000833    1342.65796   1343.84302
  1303.0    0.000767    1342.26892   1343.64246
  1282.0    0.000780    1341.87915   1343.53479
  1370.0    0.000730    1341.49011   1343.58569
  1348.0    0.000742    1341.10046   1343.93420
  1315.0    0.000760    1340.71118   1344.84985
  1341.0    0.000746    1340.32178   1346.73157
  1339.0    0.000747    1339.93213   1349.93823
  1321.0    0.000757    1339.54199   1355.31799
  1220.0    0.000820    1339.15271   1358.39502
  1241.0    0.000806    1338.76318   1356.90405
  1353.0    0.000739    1338.37341   1352.46301
  1315.0    0.000760    1337.98352   1348.54480
  1238.0    0.000808    1337.59375   1346.33716
  1218.0    0.000821    1337.20422   1345.86548
  1288.0    0.000776    1336.81396   1347.33301
  1269.0    0.000788    1336.42432   1348.80627
  1276.0    0.000784    1336.03442   1348.96094
  1335.0    0.000749    1335.64478   1347.00977
  1338.0    0.000747    1335.25488   1344.61108
  1273.0    0.000786    1334.86511   1342.86340
  1228.0    0.000814    1334.47473   1341.89319
  1254.0    0.000797    1334.08496   1341.54419
  1332.0    0.000751    1333.69482   1341.65845
  1295.0    0.000772    1333.30457   1342.14880
  1274.0    0.000785    1332.91455   1343.06848
  1258.0    0.000795    1332.52454   1344.51099
  1292.0    0.000774    1332.13489   1346.70056
  1274.0    0.000785    1331.74438   1350.09155
  1235.0    0.000810    1331.35449   1355.66992
  1378.0    0.000726    1330.96448   1365.47070
  1229.0    0.000814    1330.57422   1383.00049
  1187.0    0.000842    1330.18396   1412.58521
  1314.0    0.000761    1329.79395   1456.07202
  1217.0    0.000822    1329.40381   1502.66077
  1257.0    0.000796    1329.01392   1517.26685
  1252.0    0.000799    1328.62354   1484.53369
  1308.0    0.000765    1328.23328   1440.17981
  1300.0    0.000769    1327.84363   1409.26819
  1293.0    0.000773    1327.45337   1396.58740
  1193.0    0.000838    1327.06311   1400.37830
  1296.0    0.000772    1326.67297   1415.74219
  1225.0    0.000816    1326.28320   1429.46729
  1310.0    0.000763    1325.89246   1421.99805
  1274.0    0.000785    1325.50281   1397.32666
  1260.0    0.000794    1325.11243   1373.38098
  1297.0    0.000771    1324.72241   1356.47424
  1231.0    0.000812    1324.33215   1345.93958
  1321.0    0.000757    1323.94238   1339.59949
  1283.0    0.000779    1323.55237   1335.60535
  1307.0    0.000765    1323.16199   1332.84814
  1239.0    0.000807    1322.77234   1330.77747
  1333.0    0.000750    1322.38208   1329.12866
  1258.0    0.000795    1321.99170   1327.76453
  1363.0    0.000734    1321.60205   1326.60352
  1235.0    0.000810    1321.21191   1325.59143
  1240.0    0.000806    1320.82214   1324.69177
  1299.0    0.000770    1320.43250   1323.87842
  1327.0    0.000754    1320.04199   1323.13208
  1267.0    0.000789    1319.65247   1322.44006
  1251.0    0.000799    1319.26270   1321.79114
  1257.0    0.000796    1318.87280   1321.17712
  1200.0    0.000833    1318.48291   1319.50732
  1272.0    0.000786    1318.09314   1319.02173
  1222.0    0.000818    1317.70349   1318.54883
  1328.0    0.000753    1317.31323   1318.08630
  1246.0    0.000803    1316.92371   1317.63306
  1294.0    0.000773    1316.53394   1317.18701
  1267.0    0.000789    1316.14478   1316.74817
  1263.0    0.000792    1315.75525   1315.75000
  1195.0    0.000837    1315.36548   1315.36072
  1312.0    0.000762    1314.97583   1314.97131
  1291.0    0.000775    1314.58655   1314.62988
  1229.0    0.000814    1314.19666   1314.24231
  1265.0    0.000791    1313.80762   1313.85535
  1234.0    0.000810    1313.41760   1313.46802
  1282.0    0.000780    1313.02905   1313.08215
  1296.0    0.000772    1312.63977   1312.69556
  1234.0    0.000810    1312.25024   1312.30896
  1285.0    0.000778    1311.86121   1311.94653
  1286.0    0.000778    1311.47205   1311.56165
  1271.0    0.000787    1311.08289   1311.24231
  1282.0    0.000780    1310.69360   1310.86145
  1268.0    0.000789    1310.30493   1310.48193
  1215.0    0.000823    1309.91565   1310.10303
  1266.0    0.000790    1309.52698   1309.72607
  1285.0    0.000778    1309.13806   1309.35034
  1244.0    0.000804    1308.74939   1308.97742
  1239.0    0.000807    1308.36060   1308.60706
  1370.0    0.000730    1307.97192   1308.27271
  1287.0    0.000777    1307.58337   1307.91199
  1233.0    0.000811    1307.19434   1307.55713
  1313.0    0.000762    1306.80627   1307.21057
  1278.0    0.000782    1306.41748   1306.87317
  1307.0    0.000765    1306.02954   1306.54846
  1333.0    0.000750    1305.64136   1306.23828
  1277.0    0.000783    1305.25281   1305.94666
  1219.0    0.000820    1304.86462   1305.67688
  1212.0    0.000825    1304.47668   1305.57153
  1245.0    0.000803    1304.08862   1305.36890
  1240.0    0.000806    1303.70081   1305.20325
  1217.0    0.000822    1303.31262   1305.07825
  1299.0    0.000770    1302.92505   1305.00134
  1200.0    0.000833    1302.53699   1304.97510
  1252.0    0.000799    1302.14929   1305.00549
  1301.0    0.000769    1301.76196   1305.09619
  1225.0    0.000816    1301.37439   1305.31909
  1259.0    0.000794    1300.98694   1305.54309
  1322.0    0.000756    1300.59949   1305.83325
  1236.0    0.000809    1300.21228   1306.18884
  1194.0    0.000838    1299.82483   1306.60779
  1261.0    0.000793    1299.43774   1307.08643
  1247.0    0.000802    1299.05103   1307.61914
  1314.0    0.000761    1298.66382   1308.19800
  1266.0    0.000790    1298.27649   1308.81689
  1256.0    0.000796    1297.89026   1309.47083
  1250.0    0.000800    1297.50342   1310.15588
  1267.0    0.000789    1297.11694   1310.87842
  1312.0    0.000762    1296.73035   1311.66211
  1255.0    0.000797    1296.34387   1312.57141
  1280.0    0.000781    1295.95776   1313.75854
  1239.0    0.000807    1295.57104   1315.52820
  1270.0    0.000787    1295.18494   1318.35461
  1272.0    0.000786    1294.79932   1322.70422
  1217.0    0.000822    1294.41309   1328.40930
  1218.0    0.000821    1294.02698   1333.00244
  1265.0    0.000791    1293.64185   1332.00024
  1241.0    0.000806    1293.25586   1326.31299
  1240.0    0.000806    1292.87036   1320.54968
  1259.0    0.000794    1292.48474   1316.63586
  1232.0    0.000812    1292.09912   1314.74072
  1259.0    0.000794    1291.71411   1314.59192
  1247.0    0.000802    1291.32898   1315.59131
  1241.0    0.000806    1290.94348   1316.05420
  1250.0    0.000800    1290.55896   1313.73706
  1274.0    0.000785    1290.17444   1309.45605
  1227.0    0.000815    1289.78955   1306.41370
  1240.0    0.000806    1289.40466   1303.25500
  1257.0    0.000796    1289.02026   1300.88257
  1253.0    0.000798    1288.63599   1299.04736
  1230.0    0.000813    1288.25171   1297.54504
  1303.0    0.000767    1287.86743   1296.25647
  1266.0    0.000790    1287.48328   1295.12573
  1214.0    0.000824    1287.09961   1294.12964
  1207.0    0.000829    1286.71594   1293.79028
  1258.0    0.000795    1286.33215   1293.08276
  1246.0    0.000803    1285.94836   1292.50269
  1296.0    0.000772    1285.56494   1292.05542
  1227.0    0.000815    1285.18201   1291.75085
  1204.0    0.000831    1284.79846   1291.60327
  1261.0    0.000793    1284.41516   1291.63696
  1224.0    0.000817    1284.03284   1291.88916
  1299.0    0.000770    1283.64978   1292.41248
  1317.0    0.000759    1283.26685   1293.29272
  1231.0    0.000812    1282.88403   1294.66553
  1235.0    0.000810    1282.50195   1296.77002
  1275.0    0.000784    1282.11926   1300.07349
  1270.0    0.000787    1281.73718   1305.56799
  1222.0    0.000818    1281.35535   1315.21716
  1177.0    0.000850    1280.97339   1332.21313
  1222.0    0.000818    1280.59192   1360.20337
  1235.0    0.000810    1280.20984   1399.97815
  1287.0    0.000777    1279.82874   1439.52832
  1235.0    0.000810    1279.44727   1446.84924
  1256.0    0.000796    1279.06592   1414.76343
  1322.0    0.000756    1278.68506   1375.60559
  1236.0    0.000809    1278.30444   1348.66675
  1215.0    0.000823    1277.92334   1336.96692
  1307.0    0.000765    1277.54260   1338.97156
  1229.0    0.000814    1277.16211   1351.59204
  1270.0    0.000787    1276.78174   1366.52356
  1253.0    0.000798    1276.40112   1366.63965
  1218.0    0.000821    1276.02124   1347.66919
  1224.0    0.000817    1275.64136   1325.23828
  1225.0    0.000816    1275.26172   1308.19165
  1310.0    0.000763    1274.88245   1297.14893
  1272.0    0.000786    1274.50317   1290.39929
  1195.0    0.000837    1274.12341   1286.19080
  1265.0    0.000791    1273.74451   1283.35449
  1199.0    0.000834    1273.36548   1281.26636
  1249.0    0.000801    1272.98645   1279.53467
  1257.0    0.000796    1272.60779   1278.19067
  1213.0    0.000824    1272.22937   1277.05249
  1272.0    0.000786    1271.85083   1276.06409
  1270.0    0.000787    1271.47302   1275.18896
  1241.0    0.000806    1271.09460   1274.39868
  1205.0    0.000830    1270.71667   1273.67566
  1295.0    0.000772    1270.33887   1273.00562
  1139.0    0.000878    1269.96204   1272.37878
  1257.0    0.000796    1269.58435   1271.78577
  1273.0    0.000786    1269.20715   1270.20825
  1189.0    0.000841    1268.83032   1269.73730
  1271.0    0.000787    1268.45313   1269.27893
  1245.0    0.000803    1268.07605   1268.83081
  1263.0    0.000792    1267.69971   1268.39258
  1219.0    0.000820    1267.32361   1267.96143
  1207.0    0.000829    1266.94739   1267.53687
  1265.0    0.000791    1266.57141   1267.11829
  1252.0    0.000799    1266.19531   1266.19958
  1239.0    0.000807    1265.81982   1265.82446
  1273.0    0.000786    1265.44446   1265.44922
  1202.0    0.000832    1265.06885   1265.07422
  1270.0    0.000787    1264.69409   1264.69971
  1255.0    0.000797    1264.31897   1264.32507
  1148.0    0.000871    1263.94373   1263.95007
  1225.0    0.000816    1263.56958   1263.57629
  1155.0    0.000866    1263.19495   1263.20190
  1236.0    0.000809    1262.82117   1262.87598
  1241.0    0.000806    1262.44702   1262.50598
  1249.0    0.000801    1262.07312   1262.13684
  1248.0    0.000801    1261.69934   1261.76831
  1195.0    0.000837    1261.32568   1261.40051
  1226.0    0.000816    1260.95276   1261.03381
  1213.0    0.000824    1260.57983   1260.66846
  1227.0    0.000815    1260.20679   1260.30383
  1250.0    0.000800    1259.83398   1259.96362
  1190.0    0.000840    1259.46167   1259.60437
  1213.0    0.000824    1259.08923   1259.24731
  1216.0    0.000822    1258.71716   1258.89343
  1288.0    0.000776    1258.34509   1258.54346
  1235.0    0.000810    1257.97339   1258.19812
  1236.0    0.000809    1257.60156   1257.85840
  1193.0    0.000838    1257.23047   1257.52771
  1225.0    0.000816    1256.85925   1257.20837
  1228.0    0.000814    1256.48828   1256.90466
  1227.0    0.000815    1256.11780   1256.62390
  1263.0    0.000792    1255.74683   1256.37842
  1288.0    0.000776    1255.37659   1256.19495
  1178.0    0.000849    1255.00671   1256.12598
  1234.0    0.000810    1254.63660   1256.27014
  1248.0    0.000801    1254.26709   1256.77307
  1239.0    0.000807    1253.89709   1257.76709
  1231.0    0.000812    1253.52832   1259.17432
  1205.0    0.000830    1253.15930   1260.19189
  1217.0    0.000822    1252.79028   1259.52686
  1177.0    0.000850    1252.42163   1257.58545
  1313.0    0.000762    1252.05298   1255.70386
  1245.0    0.000803    1251.68518   1254.39929
  1223.0    0.000818    1251.31689   1253.69995
  1229.0    0.000814    1250.94897   1253.52930
  1184.0    0.000845    1250.58179   1253.75842
  1231.0    0.000812    1250.21411   1254.01526
  1258.0    0.000795    1249.84729   1253.59302
  1273.0    0.000786    1249.48022   1252.45361
  1191.0    0.000840    1249.11340   1251.18188
  1264.0    0.000791    1248.74707   1250.14368
  1159.0    0.000863    1248.38086   1249.35034
  1244.0    0.000804    1248.01477   1248.72974
  1261.0    0.000793    1247.64893   1248.21191
  1182.0    0.000846    1247.28345   1247.75085
  1273.0    0.000786    1246.91785   1247.32080
  1285.0    0.000778    1246.55298   1246.92883
  1227.0    0.000815    1246.18774   1246.53320
  1213.0    0.000824    1245.82300   1246.14856
  1213.0    0.000824    1245.45898   1245.77258
  1187.0    0.000842    1245.09473   1245.53650
  1294.0    0.000773    1244.73071   1245.18555
  1306.0    0.000766    1244.36658   1244.84277
  1192.0    0.000839    1244.00366   1244.51050
  1212.0    0.000825    1243.63989   1244.18933
  1278.0    0.000782    1243.27698   1243.88318
  1207.0    0.000829    1242.91443   1243.59607
  1231.0    0.000812    1242.55176   1243.33667
  1200.0    0.000833    1242.18958   1243.18494
  1215.0    0.000823    1241.82764   1243.04968
  1229.0    0.000814    1241.46545   1243.05298
  1172.0    0.000853    1241.10400   1243.26794
  1162.0    0.000861    1240.74243   1243.87854
  1157.0    0.000864    1240.38123   1244.87659
  1188.0    0.000842    1240.02063   1245.98328
  1198.0    0.000835    1239.65967   1246.15918
  1206.0    0.000829    1239.29944   1244.97693
  1258.0    0.000795    1238.93933   1243.45422
  1217.0    0.000822    1238.57959   1242.33740
  1207.0    0.000829    1238.21985   1241.78931
  1260.0    0.000794    1237.86060   1241.82141
  1195.0    0.000837    1237.50110   1242.46558
  1138.0    0.000879    1237.14258   1243.77661
  1196.0    0.000836    1236.78406   1245.65601
  1198.0    0.000835    1236.42517   1248.06555
  1217.0    0.000822    1236.06750   1251.51514
  1206.0    0.000829    1235.70935   1255.48767
  1180.0    0.000847    1235.35168   1256.65735
  1204.0    0.000831    1234.99463   1252.97070
  1185.0    0.000844    1234.63745   1247.69348
  1163.0    0.000860    1234.28040   1243.59741
  1226.0    0.000816    1233.92419   1241.25745
  1210.0    0.000826    1233.56763   1240.53308
  1196.0    0.000836    1233.21155   1241.17603
  1167.0    0.000857    1232.85583   1242.71350
  1183.0    0.000845    1232.50024   1243.73413
  1183.0    0.000845    1232.14478   1242.41064
  1239.0    0.000807    1231.78967   1239.47180
  1220.0    0.000820    1231.43506   1236.68494
  1218.0    0.000821    1231.08044   1234.62109
  1153.0    0.000867    1230.72644   1233.19751
  1209.0    0.000827    1230.37268   1232.19946
  1218.0    0.000821    1230.01892   1231.41016
  1187.0    0.000842    1229.66565   1230.79260
  1186.0    0.000843    1229.31262   1230.25049
  1189.0    0.000841    1228.95972   1229.75549
  1105.0    0.000905    1228.60730   1229.29285
  1195.0    0.000837    1228.25464   1228.85266
  1189.0    0.000841    1227.90295   1228.42957
  1176.0    0.000850    1227.55103   1228.01929
  1197.0    0.000835    1227.19934   1227.60046
  1246.0    0.000803    1226.84851   1227.20959
  1183.0    0.000845    1226.49707   1226.82458
  1167.0    0.000857    1226.14673   1226.44495
  1127.0    0.000887    1225.79651   1225.94019
  1131.0    0.000884    1225.44617   1225.57690
  1170.0    0.000855    1225.09656   1225.24060
  1264.0    0.000791    1224.74719   1224.88306
  1177.0    0.000850    1224.39783   1224.67346
  1180.0    0.000847    1224.04895   1224.32458
  1191.0    0.000840    1223.69995   1223.97717
  1225.0    0.000816    1223.35193   1223.63196
  1255.0    0.000797    1223.00415   1223.22180
  1191.0    0.000840    1222.65625   1222.88391
  1161.0    0.000861    1222.30872   1222.55896
  1252.0    0.000799    1221.96118   1222.22375
  1213.0    0.000824    1221.61426   1221.88977
  1192.0    0.000839    1221.26770   1221.63208
  1170.0    0.000855    1220.92151   1221.30469
  1160.0    0.000862    1220.57544   1220.97986
  1118.0    0.000894    1220.22961   1220.65771
  1151.0    0.000869    1219.88403   1220.33899
  1169.0    0.000855    1219.53894   1220.02502
  1198.0    0.000835    1219.19409   1219.71655
  1180.0    0.000847    1218.84937   1219.41528
  1240.0    0.000806    1218.50513   1219.12329
  1202.0    0.000832    1218.16125   1218.84338
  1100.0    0.000909    1217.81775   1218.57922
  1185.0    0.000844    1217.47400   1218.33435
  1181.0    0.000847    1217.13098   1218.11511
  1163.0    0.000860    1216.78809   1217.92737
  1175.0    0.000851    1216.44592   1217.77942
  1212.0    0.000825    1216.10339   1217.67883
  1224.0    0.000817    1215.76172   1217.63635
  1134.0    0.000882    1215.42053   1217.66333
  1182.0    0.000846    1215.07922   1217.76953
  1232.0    0.000812    1214.73804   1217.96802
  1196.0    0.000836    1214.39722   1218.26904
  1184.0    0.000845    1214.05750   1218.68469
  1195.0    0.000837    1213.71716   1219.22131
  1112.0    0.000899    1213.37708   1219.88550
  1168.0    0.000856    1213.03796   1220.68042
  1147.0    0.000872    1212.69885   1221.60339
  1128.0    0.000887    1212.36011   1222.64758
  1205.0    0.000830    1212.02148   1223.80054
  1200.0    0.000833    1211.68347   1225.04297
  1155.0    0.000866    1211.34558   1226.35010
  1153.0    0.000867    1211.00806   1227.69031
  1171.0    0.000854    1210.67102   1229.02661
  1196.0    0.000836    1210.33362   1230.31519
  1208.0    0.000828    1209.99744   1231.51196
  1208.0    0.000828    1209.66101   1232.56714
  1238.0    0.000808    1209.32532   1233.43542
  1202.0    0.000832    1208.98975   1234.07617
  1168.0    0.000856    1208.65417   1234.45715
  1180.0    0.000847    1208.31934   1234.55994
  1232.0    0.000812    1207.98462   1234.37769
  1186.0    0.000843    1207.65027   1233.91626
  1150.0    0.000870    1207.31616   1233.19043
  1221.0    0.000819    1206.98291   1232.22131
  1209.0    0.000827    1206.64905   1231.03223
  1187.0    0.000842    1206.31641   1229.65015
  1223.0    0.000818    1205.98364   1228.10254
  1223.0    0.000818    1205.65137   1226.41980
  1194.0    0.000838    1205.31934   1224.63403
  1222.0    0.000818    1204.98718   1222.77979
  1102.0    0.000907    1204.65601   1220.89258
  1197.0    0.000835    1204.32495   1219.00598
  1227.0    0.000815    1203.99390   1217.15051
  1195.0    0.000837    1203.66357   1215.35229
  1199.0    0.000834    1203.33386   1213.63269
  1208.0    0.000828    1203.00427   1212.00684
  1136.0    0.000880    1202.67456   1210.48596
  1189.0    0.000841    1202.34558   1209.07568
  1178.0    0.000849    1202.01697   1207.77844
  1151.0    0.000869    1201.68860   1206.59277
  1166.0    0.000858    1201.36035   1205.51453
  1241.0    0.000806    1201.03235   1204.53882
  1206.0    0.000829    1200.70544   1203.65710
  1212.0    0.000825    1200.37817   1202.86035
  1204.0    0.000831    1200.05176   1202.14063
  1226.0    0.000816    1199.72534   1201.48755
  1156.0    0.000865    1199.39929   1200.89294
  1199.0    0.000834    1199.07397   1200.34753
  1148.0    0.000871    1198.74866   1200.52161
  1153.0    0.000867    1198.42346   1200.08118
  1216.0    0.000822    1198.09888   1199.67114
  1159.0    0.000863    1197.77441   1199.28625
  1215.0    0.000823    1197.45044   1198.92200
  1174.0    0.000852    1197.12695   1198.57507
  1268.0    0.000789    1196.80371   1198.24219
  1134.0    0.000882    1196.48059   1197.92212
  1181.0    0.000847    1196.15833   1197.61304
  1197.0    0.000835    1195.83606   1197.65247
  1214.0    0.000824    1195.51404   1197.37842
  1148.0    0.000871    1195.19263   1198.40857
  1171.0    0.000854    1194.87158   1198.21326
  1187.0    0.000842    1194.55054   1198.01294
  1201.0    0.000833    1194.23035   1197.85901
  1208.0    0.000828    1193.91028   1197.73120
  1159.0    0.000863    1193.58997   1197.48743
  1235.0    0.000810    1193.27100   1197.43921
  1225.0    0.000816    1192.95166   1197.44312
  1142.0    0.000876    1192.63306   1197.51331
  1218.0    0.000821    1192.31506   1198.31274
  1196.0    0.000836    1191.99695   1198.58899
  1206.0    0.000829    1191.67957   1199.01404
  1228.0    0.000814    1191.36230   1199.60767
  1213.0    0.000824    1191.04529   1200.33289
  1246.0    0.000803    1190.72888   1201.38977
  1218.0    0.000821    1190.41272   1202.74829
  1271.0    0.000787    1190.09692   1204.46399
  1228.0    0.000814    1189.78137   1206.59595
  1160.0    0.000862    1189.46631   1209.20593
  1223.0    0.000818    1189.15137   1212.35547
  1218.0    0.000821    1188.83740   1216.10632
  1234.0    0.000810    1188.52307   1220.51428
  1247.0    0.000802    1188.20959   1225.63147
  1252.0    0.000799    1187.89612   1231.49878
  1245.0    0.000803    1187.58337   1238.14758
  1289.0    0.000776    1187.27112   1245.59595
  1223.0    0.000818    1186.95874   1253.84399
  1247.0    0.000802    1186.64709   1262.87488
  1276.0    0.000784    1186.33569   1272.64966
  1235.0    0.000810    1186.02466   1283.10559
  1288.0    0.000776    1185.71375   1294.15454
  1318.0    0.000759    1185.40381   1305.68359
  1260.0    0.000794    1185.09338   1317.55750
  1291.0    0.000775    1184.78406   1329.62891
  1322.0    0.000756    1184.47510   1341.74817
  1263.0    0.000792    1184.16589   1353.77344
  1286.0    0.000778    1183.85767   1365.57642
  1359.0    0.000736    1183.54944   1377.03723
  1360.0    0.000735    1183.24158   1388.03003
  1298.0    0.000770    1182.93469   1398.41113
  1398.0    0.000715    1182.62769   1407.99731
  1397.0    0.000716    1182.32068   1416.57141
  1376.0    0.000727    1182.01489   1423.88013
  1351.0    0.000740    1181.70898   1429.65442
  1332.0    0.000751    1181.40356   1433.63696
  1374.0    0.000728    1181.09839   1435.61548
  1365.0    0.000733    1180.79382   1435.45618
  1374.0    0.000728    1180.48987   1433.12366
  1344.0    0.000744    1180.18542   1428.68628
  1301.0    0.000769    1179.88184   1422.29980
  1317.0    0.000759    1179.57886   1414.17297
  1359.0    0.000736    1179.27625   1404.54028
  1437.0    0.000696    1178.97363   1393.63220
  1341.0    0.000746    1178.67200   1381.66943
  1330.0    0.000752    1178.37012   1368.85925
  1246.0    0.000803    1178.06909   1355.40955
  1264.0    0.000791    1177.76819   1341.53479
  1338.0    0.000747    1177.46765   1327.46057
  1267.0    0.000789    1177.16772   1313.41907
  1298.0    0.000770    1176.86768   1299.63440
  1374.0    0.000728    1176.56860   1286.31030
  1328.0    0.000753    1176.26953   1273.61829
  1288.0    0.000776    1175.97144   1261.69324
  1251.0    0.000799    1175.67310   1250.62976
  1327.0    0.000754    1175.37537   1240.48828
  1221.0    0.000819    1175.07788   1231.29602
  1257.0    0.000796    1174.78088   1223.05225
  1290.0    0.000775    1174.48474   1215.73474
  1175.0    0.000851    1174.18835   1209.30090
  1236.0    0.000809    1173.89246   1203.69592
  1232.0    0.000812    1173.59705   1198.85461
  1268.0    0.000789    1173.30212   1194.70459
  1218.0    0.000821    1173.00745   1191.17102
  1168.0    0.000856    1172.71326   1188.17822
  1258.0    0.000795    1172.41943   1185.65393
  1235.0    0.000810    1172.12622   1183.52832
  1273.0    0.000786    1171.83325   1181.73816
  1188.0    0.000842    1171.54028   1180.22632
  1344.0    0.000744    1171.24854   1178.94324
  1218.0    0.000821    1170.95642   1177.84387
  1229.0    0.000814    1170.66492   1176.22327
  1213.0    0.000824    1170.37439   1175.41760
  1091.0    0.000917    1170.08313   1174.70190
  1200.0    0.000833    1169.79333   1174.05884
  1226.0    0.000816    1169.50330   1173.47058
  1255.0    0.000797    1169.21399   1172.92639
  1257.0    0.000796    1168.92517   1172.41663
  1156.0    0.000865    1168.63623   1171.93274
  1224.0    0.000817    1168.34778   1171.47107
  1204.0    0.000831    1168.06006   1170.69482
  1190.0    0.000840    1167.77283   1170.27881
  1125.0    0.000889    1167.48584   1169.87378
  1245.0    0.000803    1167.19910   1168.18860
  1160.0    0.000862    1166.91248   1167.85339
  1240.0    0.000806    1166.62695   1167.52332
  1166.0    0.000858    1166.34204   1167.19702
  1191.0    0.000840    1166.05676   1166.87366
  1216.0    0.000822    1165.77209   1166.55310
  1204.0    0.000831    1165.48804   1166.23596
  1171.0    0.000854    1165.20398   1165.92078
  1191.0    0.000840    1164.92090   1165.60852
  1184.0    0.000845    1164.63782   1164.65662
  1164.0    0.000859    1164.35535   1164.37415
  1157.0    0.000864    1164.07336   1164.09216
  1157.0    0.000864    1163.79150   1163.81042
  1155.0    0.000866    1163.51013   1163.52905
  1210.0    0.000826    1163.22925   1163.24841
  1210.0    0.000826    1162.94861   1162.96765
  1252.0    0.000799    1162.66895   1162.68811
  1204.0    0.000831    1162.38904   1162.40808
  1128.0    0.000887    1162.10974   1162.12878
  1127.0    0.000887    1161.83081   1161.84998
  1147.0    0.000872    1161.55273   1161.57202
  1194.0    0.000838    1161.27454   1163.43164
  1232.0    0.000812    1160.99707   1163.32397
  1163.0    0.000860    1160.71960   1163.23743
  1179.0    0.000848    1160.44275   1163.17603
  1173.0    0.000853    1160.16699   1163.14465
  1177.0    0.000850    1159.89050   1163.53625
  1125.0    0.000889    1159.61487   1163.61157
  1176.0    0.000850    1159.34021   1163.74084
  1171.0    0.000854    1159.06531   1163.93481
  1213.0    0.000824    1158.79114   1165.25171
  1178.0    0.000849    1158.51709   1165.70605
  1163.0    0.000860    1158.24377   1166.29370
  1183.0    0.000845    1157.97095   1167.05017
  1184.0    0.000845    1157.69800   1168.02063
  1143.0    0.000875    1157.42578   1169.46069
  1142.0    0.000876    1157.15454   1171.09668
  1128.0    0.000887    1156.88269   1173.23547
  1103.0    0.000907    1156.61182   1176.07385
  1191.0    0.000840    1156.34180   1180.02026
  1158.0    0.000864    1156.07104   1185.45093
  1185.0    0.000844    1155.80188   1193.53748
  1152.0    0.000868    1155.53235   1206.38733
  1205.0    0.000830    1155.26379   1227.70178
  1181.0    0.000847    1154.99512   1262.72119
  1132.0    0.000883    1154.72742   1316.35986
  1206.0    0.000829    1154.45996   1386.21680
  1180.0    0.000847    1154.19275   1444.42017
  1186.0    0.000843    1153.92578   1442.53198
  1229.0    0.000814    1153.65955   1389.35303
  1168.0    0.000856    1153.39380   1336.13086
  1126.0    0.000888    1153.12817   1305.19531
  1173.0    0.000853    1152.86328   1293.55750
  1149.0    0.000870    1152.59875   1289.36694
  1251.0    0.000799    1152.33435   1290.74573
  1230.0    0.000813    1152.07117   1303.94678
  1161.0    0.000861    1151.80774   1322.25635
  1165.0    0.000858    1151.54443   1320.91907
  1180.0    0.000847    1151.28259   1291.73328
  1136.0    0.000880    1151.02075   1257.67261
  1168.0    0.000856    1150.75879   1233.88684
  1146.0    0.000873    1150.49792   1219.91187
  1187.0    0.000842    1150.23645   1209.18689
  1199.0    0.000834    1149.97681   1197.09790
  1193.0    0.000838    1149.71680   1185.78198
  1159.0    0.000863    1149.45703   1177.20728
  1175.0    0.000851    1149.19836   1171.27856
  1114.0    0.000898    1148.93970   1167.30786
  1171.0    0.000854    1148.68164   1164.64539
  1140.0    0.000877    1148.42371   1162.83105
  1225.0    0.000816    1148.16626   1161.72375
  1179.0    0.000848    1147.90955   1160.90906
  1226.0    0.000816    1147.65344   1160.43335
  1133.0    0.000883    1147.39746   1160.23853
  1161.0    0.000861    1147.14185   1160.29700
  1179.0    0.000848    1146.88708   1160.58936
  1206.0    0.000829    1146.63159   1161.10181
  1175.0    0.000851    1146.37756   1161.83167
  1144.0    0.000874    1146.12390   1162.78406
  1142.0    0.000876    1145.87036   1163.98291
  1171.0    0.000854    1145.61755   1165.49243
  1247.0    0.000802    1145.36511   1167.46338
  1117.0    0.000895    1145.11304   1170.19824
  1211.0    0.000826    1144.86169   1174.21265
  1142.0    0.000876    1144.61011   1180.15381
  1165.0    0.000858    1144.35962   1188.39209
  1185.0    0.000844    1144.10938   1197.61377
  1199.0    0.000834    1143.85864   1202.54468
  1234.0    0.000810    1143.60925   1198.69824
  1158.0    0.000864    1143.36060   1190.52405
  1181.0    0.000847    1143.11182   1183.38623
  1195.0    0.000837    1142.86377   1178.73792
  1190.0    0.000840    1142.61597   1176.41394
  1232.0    0.000812    1142.36890   1176.05835
  1222.0    0.000818    1142.12244   1177.42896
  1211.0    0.000826    1141.87573   1180.05334
  1150.0    0.000870    1141.62964   1182.05518
  1246.0    0.000803    1141.38428   1180.28967
  1206.0    0.000829    1141.13867   1175.04932
  1170.0    0.000855    1140.89429   1169.34546
  1167.0    0.000857    1140.65015   1164.59814
  1234.0    0.000810    1140.40625   1160.94324
  1200.0    0.000833    1140.16321   1158.12183
  1197.0    0.000835    1139.92004   1155.84009
  1180.0    0.000847    1139.67749   1153.89294
  1223.0    0.000818    1139.43567   1152.16919
  1182.0    0.000846    1139.19434   1150.61487
  1158.0    0.000864    1138.95264   1149.19238
  1206.0    0.000829    1138.71228   1147.85034
  1189.0    0.000841    1138.47168   1146.55066
  1152.0    0.000868    1138.23230   1145.32666
  1141.0    0.000876    1137.99292   1143.75635
  1198.0    0.000835    1137.75378   1142.76038
  1251.0    0.000799    1137.51501   1141.86511
  1185.0    0.000844    1137.27734   1141.05872
  1170.0    0.000855    1137.03967   1140.33105
  1175.0    0.000851    1136.80212   1139.67224
  1138.0    0.000879    1136.56543   1139.07532
  1179.0    0.000848    1136.32922   1138.53284
  1177.0    0.000850    1136.09387   1138.03796
  1172.0    0.000853    1135.85840   1137.35718
  1129.0    0.000886    1135.62341   1137.08643
  1181.0    0.000847    1135.38904   1136.71558
  1220.0    0.000820    1135.15466   1136.37122
  1181.0    0.000847    1134.92102   1136.04932
  1214.0    0.000824    1134.68823   1135.74670
  1134.0    0.000882    1134.45520   1135.46008
  1168.0    0.000856    1134.22302   1135.18787
  1154.0    0.000867    1133.99133   1134.92847
  1173.0    0.000853    1133.75903   1134.67944
  1157.0    0.000864    1133.52856   1134.34937
  1156.0    0.000865    1133.29810   1134.19849
  1163.0    0.000860    1133.06799   1133.99207
  1133.0    0.000883    1132.83850   1133.79993
  1148.0    0.000871    1132.60925   1133.62183
  1249.0    0.000801    1132.38037   1133.46326
  1243.0    0.000805    1132.15222   1133.32727
  1157.0    0.000864    1131.92407   1133.22156
  1130.0    0.000885    1131.69678   1133.15759
  1155.0    0.000866    1131.46997   1133.08008
  1142.0    0.000876    1131.24316   1133.11841
  1132.0    0.000883    1131.01782   1133.34668
  1131.0    0.000884    1130.79150   1133.82288
  1182.0    0.000846    1130.56628   1134.74292
  1115.0    0.000897    1130.34180   1137.09619
  1136.0    0.000880    1130.11768   1139.88501
  1165.0    0.000858    1129.89368   1143.84583
  1166.0    0.000858    1129.67017   1147.94336
  1112.0    0.000899    1129.44727   1149.05225
  1143.0    0.000875    1129.22485   1146.07507
  1114.0    0.000898    1129.00281   1141.72839
  1156.0    0.000865    1128.78125   1138.27686
  1093.0    0.000915    1128.55981   1136.17676
  1165.0    0.000858    1128.33911   1135.61890
  1130.0    0.000885    1128.11877   1135.80627
  1080.0    0.000926    1127.89905   1136.94556
  1133.0    0.000883    1127.67957   1138.81042
  1142.0    0.000876    1127.46106   1140.45605
  1106.0    0.000904    1127.24268   1140.32043
  1137.0    0.000880    1127.02429   1138.59790
  1222.0    0.000818    1126.80664   1136.87476
  1175.0    0.000851    1126.58960   1135.91785
  1171.0    0.000854    1126.37268   1135.83630
  1148.0    0.000871    1126.15674   1136.63806
  1168.0    0.000856    1125.94104   1138.48169
  1130.0    0.000885    1125.72522   1141.87024
  1152.0    0.000868    1125.51025   1147.80762
  1102.0    0.000907    1125.29614   1157.77283
  1183.0    0.000845    1125.08203   1173.22107
  1123.0    0.000890    1124.86829   1193.69080
  1104.0    0.000906    1124.65552   1211.62610
  1153.0    0.000867    1124.44250   1212.06421
  1103.0    0.000907    1124.23059   1194.79309
  1163.0    0.000860    1124.01868   1174.86975
  1158.0    0.000864    1123.80713   1160.27820
  1119.0    0.000894    1123.59644   1151.79285
  1126.0    0.000888    1123.38586   1148.83740
  1109.0    0.000902    1123.17554   1150.53162
  1109.0    0.000902    1122.96643   1156.40784
  1170.0    0.000855    1122.75708   1164.96704
  1208.0    0.000828    1122.54858   1170.71118
  1179.0    0.000848    1122.34009   1166.75171
  1185.0    0.000844    1122.13257   1156.02466
  1160.0    0.000862    1121.92542   1145.59790
  1114.0    0.000898    1121.71851   1137.90808
  1182.0    0.000846    1121.51208   1132.90161
  1093.0    0.000915    1121.30615   1129.70752
  1152.0    0.000868    1121.10022   1127.61365
  1169.0    0.000855    1120.89526   1126.14868
  1126.0    0.000888    1120.69116   1125.04810
  1174.0    0.000852    1120.48621   1124.17249
  1133.0    0.000883    1120.28296   1123.44983
  1136.0    0.000880    1120.07947   1122.83411
  1125.0    0.000889    1119.87659   1122.29785
  1125.0    0.000889    1119.67444   1121.82251
  1140.0    0.000877    1119.47229   1121.39282
  1168.0    0.000856    1119.27063   1120.99927
  1156.0    0.000865    1119.06995   1119.94165
  1141.0    0.000876    1118.86914   1119.64941
  1187.0    0.000842    1118.66882   1119.37231
  1139.0    0.000878    1118.46936   1119.10657
  1089.0    0.000918    1118.26978   1118.84973
  1169.0    0.000855    1118.07080   1118.60168
  1192.0    0.000839    1117.87244   1118.36011
  1074.0    0.000931    1117.67468   1118.12439
  1205.0    0.000830    1117.47717   1117.89343
  1155.0    0.000866    1117.28015   1117.66638
  1135.0    0.000881    1117.08362   1117.10474
  1161.0    0.000861    1116.88757   1116.90881
  1131.0    0.000884    1116.69141   1116.71252
  1132.0    0.000883    1116.49634   1116.51746
  1128.0    0.000887    1116.30164   1116.32288
  1085.0    0.000922    1116.10657   1116.12769
  1143.0    0.000875    1115.91309   1115.93408
  1153.0    0.000867    1115.71960   1115.74084
  1133.0    0.000883    1115.52649   1115.54761
  1153.0    0.000867    1115.33411   1115.35510
  1194.0    0.000838    1115.14209   1115.16309
  1110.0    0.000901    1114.94995   1114.97107
  1193.0    0.000838    1114.75916   1114.78027
  1138.0    0.000879    1114.56799   1114.58923
  1181.0    0.000847    1114.37769   1114.39868
  1121.0    0.000892    1114.18762   1114.20874
  1140.0    0.000877    1113.99817   1114.01904
  1168.0    0.000856    1113.80859   1113.82971
  1159.0    0.000863    1113.62061   1113.77307
  1128.0    0.000887    1113.43201   1113.59497
  1125.0    0.000889    1113.24463   1113.41858
  1088.0    0.000919    1113.05750   1113.24487
  1160.0    0.000862    1112.87000   1113.07190
  1134.0    0.000882    1112.68396   1112.90283
  1175.0    0.000851    1112.49805   1112.73608
  1156.0    0.000865    1112.31238   1114.50378
  1134.0    0.000882    1112.12744   1114.42773
  1131.0    0.000884    1111.94287   1114.36206
  1245.0    0.000803    1111.75842   1114.37317
  1232.0    0.000812    1111.57471   1114.33789
  1180.0    0.000847    1111.39124   1114.31934
  1146.0    0.000873    1111.20886   1115.29639
  1221.0    0.000819    1111.02637   1115.36487
  1145.0    0.000873    1110.84399   1115.46619
  1202.0    0.000832    1110.66272   1115.60986
  1148.0    0.000871    1110.48157   1116.76514
  1172.0    0.000853    1110.30090   1117.07764
  1180.0    0.000847    1110.12073   1117.49878
  1250.0    0.000800    1109.94080   1118.08594
  1189.0    0.000841    1109.76160   1118.94885
  1212.0    0.000825    1109.58289   1120.27441
  1183.0    0.000845    1109.40393   1122.82056
  1249.0    0.000801    1109.22607   1125.93909
  1178.0    0.000849    1109.04858   1130.14478
  1166.0    0.000858    1108.87122   1134.42017
  1212.0    0.000825    1108.69434   1136.14258
  1214.0    0.000824    1108.51855   1134.48853
  1273.0    0.000786    1108.34229   1132.08081
  1248.0    0.000801    1108.16711   1130.84302
  1288.0    0.000776    1107.99194   1131.20581
  1238.0    0.000808    1107.81726   1133.14282
  1294.0    0.000773    1107.64343   1136.63281
  1324.0    0.000755    1107.46960   1141.74573
  1307.0    0.000765    1107.29651   1148.53088
  1255.0    0.000797    1107.12354   1156.68848
  1320.0    0.000758    1106.95081   1164.83826
  1287.0    0.000777    1106.77917   1172.74561
  1294.0    0.000773    1106.60803   1181.87097
  1348.0    0.000742    1106.43677   1193.07886
  1362.0    0.000734    1106.26599   1206.67322
  1304.0    0.000767    1106.09558   1222.56091
  1389.0    0.000720    1105.92615   1240.55334
  1348.0    0.000742    1105.75720   1260.41846
  1313.0    0.000762    1105.58826   1281.94421
  1437.0    0.000696    1105.41956   1304.72095
  1380.0    0.000725    1105.25159   1328.28931
  1469.0    0.000681    1105.08386   1352.43933
  1404.0    0.000712    1104.91663   1376.14575
  1392.0    0.000718    1104.75037   1398.90393
  1457.0    0.000686    1104.58350   1420.07190
  1474.0    0.000678    1104.41772   1439.00012
  1465.0    0.000683    1104.25208   1455.12817
  1468.0    0.000681    1104.08679   1467.91113
  1459.0    0.000685    1103.92297   1477.38293
  1494.0    0.000669    1103.75879   1483.23792
  1472.0    0.000679    1103.59473   1485.51306
  1486.0    0.000673    1103.43152   1484.42688
  1471.0    0.000680    1103.26855   1479.90698
  1474.0    0.000678    1103.10620   1472.29089
  1545.0    0.000647    1102.94458   1461.85266
  1456.0    0.000687    1102.78223   1448.91711
  1465.0    0.000683    1102.62122   1433.85669
  1418.0    0.000705    1102.46069   1417.08643
  1403.0    0.000713    1102.29993   1399.06592
  1382.0    0.000724    1102.14050   1380.30005
  1416.0    0.000706    1101.98120   1361.33765
  1318.0    0.000759    1101.82190   1342.77417
  1340.0    0.000746    1101.66357   1325.24207
  1370.0    0.000730    1101.50537   1309.29199
  1303.0    0.000767    1101.34753   1294.98413
  1264.0    0.000791    1101.19067   1281.84241
  1335.0    0.000749    1101.03320   1270.36450
  1285.0    0.000778    1100.87683   1260.87366
  1316.0    0.000760    1100.72070   1249.88037
  1313.0    0.000762    1100.56470   1233.77039
  1232.0    0.000812    1100.40991   1215.81384
  1262.0    0.000792    1100.25476   1200.35046
  1242.0    0.000805    1100.10022   1188.57019
  1281.0    0.000781    1099.94653   1180.16589
  1231.0    0.000812    1099.79285   1174.37939
  1266.0    0.000790    1099.64001   1170.24121
  1289.0    0.000776    1099.48730   1167.32190
  1218.0    0.000821    1099.33472   1165.58582
  1191.0    0.000840    1099.18298   1163.46289
  1216.0    0.000822    1099.03186   1158.61157
  1159.0    0.000863    1098.88000   1151.87646
  1165.0    0.000858    1098.72998   1145.53455
  1154.0    0.000867    1098.58008   1140.37500
  1153.0    0.000867    1098.42981   1136.27600
  1201.0    0.000833    1098.28052   1132.92578
  1188.0    0.000842    1098.13159   1130.04651
  1146.0    0.000873    1097.98279   1127.45276
  1209.0    0.000827    1097.83521   1125.03821
  1202.0    0.000832    1097.68701   1122.74805
  1224.0    0.000817    1097.54004   1120.56152
  1242.0    0.000805    1097.39307   1118.47144
  1200.0    0.000833    1097.24683   1114.48682
  1163.0    0.000860    1097.10071   1112.68237
  1200.0    0.000833    1096.95532   1110.98547
  1213.0    0.000824    1096.80933   1109.40125
  1220.0    0.000820    1096.66479   1107.93433
  1161.0    0.000861    1096.52026   1106.58618
  1197.0    0.000835    1096.37622   1104.39319
  1149.0    0.000870    1096.23303   1103.31738
  1132.0    0.000883    1096.08960   1102.34973
  1112.0    0.000899    1095.94641   1101.48425
  1201.0    0.000833    1095.80469   1100.71436
  1177.0    0.000850    1095.66260   1099.08801
  1141.0    0.000876    1095.52063   1098.52112
  1151.0    0.000869    1095.37988   1098.02161
  1164.0    0.000859    1095.23877   1097.57959
  1223.0    0.000818    1095.09851   1097.18823
  1206.0    0.000829    1094.95923   1096.35706
  1161.0    0.000861    1094.81885   1096.07788
  1173.0    0.000853    1094.67993   1095.81372
  1154.0    0.000867    1094.54138   1095.57214
  1207.0    0.000829    1094.40271   1095.35938
  1175.0    0.000851    1094.26526   1095.15283
  1136.0    0.000880    1094.12720   1094.97217
  1158.0    0.000864    1093.99011   1094.78748
  1172.0    0.000853    1093.85352   1094.61121
  1144.0    0.000874    1093.71716   1094.44104
  1096.0    0.000912    1093.58118   1094.27661
  1181.0    0.000847    1093.44556   1094.12476
  1166.0    0.000858    1093.31055   1093.97046
  1154.0    0.000867    1093.17554   1093.71619
  1132.0    0.000883    1093.04126   1093.58032
  1192.0    0.000839    1092.90723   1093.44348
  1118.0    0.000894    1092.77429   1093.21631
  1146.0    0.000873    1092.64063   1094.76404
  1130.0    0.000885    1092.50806   1094.78052
  1156.0    0.000865    1092.37573   1094.82239
  1152.0    0.000868    1092.24377   1094.89661
  1138.0    0.000879    1092.11230   1095.01221
  1096.0    0.000912    1091.98157   1095.18616
  1126.0    0.000888    1091.84998   1095.34155
  1105.0    0.000905    1091.72009   1095.72021
  1103.0    0.000907    1091.58972   1096.25574
  1149.0    0.000870    1091.45972   1096.88318
  1137.0    0.000880    1091.33118   1098.46606
  1117.0    0.000895    1091.20190   1099.11646
  1149.0    0.000870    1091.07336   1099.49414
  1134.0    0.000882    1090.94580   1099.90295
  1155.0    0.000866    1090.81787   1100.59631
  1040.0    0.000962    1090.69006   1101.67773
  1166.0    0.000858    1090.56348   1103.22302
  1110.0    0.000901    1090.43677   1105.34412
  1135.0    0.000881    1090.31067   1108.24182
  1130.0    0.000885    1090.18506   1112.27417
  1138.0    0.000879    1090.05969   1118.08459
  1110.0    0.000901    1089.93494   1126.81580
  1157.0    0.000864    1089.81006   1140.46753
  1113.0    0.000898    1089.68604   1162.12915
  1131.0    0.000884    1089.56213   1195.02832
  1135.0    0.000881    1089.43872   1239.02979
  1067.0    0.000937    1089.31506   1280.90222
  1118.0    0.000894    1089.19312   1289.80237
  1102.0    0.000907    1089.07043   1257.51697
  1110.0    0.000901    1088.94873   1213.71094
  1153.0    0.000867    1088.82715   1179.08521
  1121.0    0.000892    1088.70520   1157.31201
  1079.0    0.000927    1088.58472   1146.65222
  1104.0    0.000906    1088.46436   1145.17957
  1104.0    0.000906    1088.34375   1152.03357
  1149.0    0.000870    1088.22461   1166.77234
  1114.0    0.000898    1088.10522   1186.15063
  1120.0    0.000893    1087.98572   1198.16541
  1199.0    0.000834    1087.86768   1189.21875
  1143.0    0.000875    1087.74915   1166.28162
  1061.0    0.000943    1087.63159   1143.95667
  1127.0    0.000887    1087.51416   1127.47620
  1145.0    0.000873    1087.39673   1116.48999
  1137.0    0.000880    1087.28015   1109.39868
  1109.0    0.000902    1087.16357   1104.73743
  1151.0    0.000869    1087.04749   1101.50269
  1111.0    0.000900    1086.93164   1099.11023
  1064.0    0.000940    1086.81677   1097.24707
  1160.0    0.000862    1086.70142   1095.74011
  1113.0    0.000898    1086.58716   1094.49146
  1110.0    0.000901    1086.47290   1093.43555
  1082.0    0.000924    1086.35901   1092.52844
  1061.0    0.000943    1086.24548   1091.74072
  1094.0    0.000914    1086.13232   1091.04895
  1131.0    0.000884    1086.01917   1090.43616
  1140.0    0.000877    1085.90747   1089.89124
  1117.0    0.000895    1085.79504   1089.40173
  1138.0    0.000879    1085.68335   1088.96045
  1133.0    0.000883    1085.57251   1088.56116
  1107.0    0.000903    1085.46082   1088.19653
  1114.0    0.000898    1085.35046   1087.86401
  1127.0    0.000887    1085.24023   1087.55750
  1103.0    0.000907    1085.13000   1087.27478
  1068.0    0.000936    1085.02087   1087.01208
  1125.0    0.000889    1084.91125   1086.76660
  1137.0    0.000880    1084.80225   1086.53638
  1103.0    0.000907    1084.69397   1086.31909
  1082.0    0.000924    1084.58582   1086.11328
  1085.0    0.000922    1084.47766   1085.91724
  1106.0    0.000904    1084.37036   1085.72998
  1122.0    0.000891    1084.26270   1085.53723
  1120.0    0.000893    1084.15625   1085.36438
  1155.0    0.000866    1084.05005   1085.19763
  1130.0    0.000885    1083.94336   1085.03516
  1112.0    0.000899    1083.83813   1084.87830
  1059.0    0.000944    1083.73254   1084.72522
  1045.0    0.000957    1083.62720   1084.57507
  1112.0    0.000899    1083.52295   1084.42944
  1153.0    0.000867    1083.41809   1084.27625
  1077.0    0.000929    1083.31396   1084.13611
  1108.0    0.000903    1083.21033   1083.99426
  1048.0    0.000954    1083.10681   1083.84790
  1084.0    0.000923    1083.00391   1083.71594
  1112.0    0.000899    1082.90161   1083.58655
  1161.0    0.000861    1082.79883   1083.45789
  1182.0    0.000846    1082.69666   1083.33179
  1059.0    0.000944    1082.59497   1083.20703
  1073.0    0.000932    1082.49341   1083.08398
  1097.0    0.000912    1082.39294   1082.64038
  1078.0    0.000928    1082.29175   1082.52979
  1116.0    0.000896    1082.19104   1082.42078
  1116.0    0.000896    1082.09155   1082.10217
  1099.0    0.000910    1081.99182   1082.00244
  1077.0    0.000929    1081.89221   1081.90283
  1041.0    0.000961    1081.79333   1081.80408
  1129.0    0.000886    1081.69421   1081.70496
  1054.0    0.000949    1081.59570   1081.60632
  1049.0    0.000953    1081.49768   1081.50793
  1084.0    0.000923    1081.39954   1081.41003
  1082.0    0.000924    1081.30237   1081.31274
  1089.0    0.000918    1081.20496   1081.21533
  1106.0    0.000904    1081.10803   1081.11804
  1087.0    0.000920    1081.01160   1081.02173
  1106.0    0.000904    1080.91541   1080.92529
  1033.0    0.000968    1080.81970   1080.82983
  1072.0    0.000933    1080.72449   1080.73425
  1107.0    0.000903    1080.62866   1080.63879
  1054.0    0.000949    1080.53381   1080.54346
  1066.0    0.000938    1080.43945   1080.47217
  1097.0    0.000912    1080.34436   1080.37817
  1069.0    0.000935    1080.25098   1080.28577
  1080.0    0.000926    1080.15710   1080.19287
  1113.0    0.000898    1080.06360   1080.10034
  1106.0    0.000904    1079.97058   1080.05225
  1096.0    0.000912    1079.87769   1079.96265
  1147.0    0.000872    1079.78528   1079.87329
  1067.0    0.000937    1079.69324   1079.78528
  1118.0    0.000894    1079.60132   1079.69702
  1112.0    0.000899    1079.50964   1079.61011
  1076.0    0.000929    1079.41895   1079.53516
  1066.0    0.000938    1079.32690   1079.44885
  1141.0    0.000876    1079.23645   1079.36499
  1087.0    0.000920    1079.14624   1079.28125
  1101.0    0.000908    1079.05579   1079.19849
  1055.0    0.000948    1078.96643   1079.13904
  1047.0    0.000955    1078.87646   1079.06030
  1127.0    0.000887    1078.78748   1078.98303
  1108.0    0.000903    1078.69873   1078.90845
  1126.0    0.000888    1078.61035   1078.83691
  1137.0    0.000880    1078.52185   1078.76831
  1095.0    0.000913    1078.43396   1078.70471
  1062.0    0.000942    1078.34583   1078.64636
  1117.0    0.000895    1078.25842   1078.59570
  1087.0    0.000920    1078.17163   1078.55481
  1079.0    0.000927    1078.08459   1078.52380
  1074.0    0.000931    1077.99792   1078.50806
  1068.0    0.000936    1077.91138   1078.50793
  1166.0    0.000858    1077.82532   1078.52893
  1066.0    0.000938    1077.73975   1078.57397
  1075.0    0.000930    1077.65454   1078.64587
  1113.0    0.000898    1077.56921   1078.74854
  1083.0    0.000923    1077.48450   1078.88660
  1066.0    0.000938    1077.39954   1079.06152
  1084.0    0.000923    1077.31506   1079.27576
  1113.0    0.000898    1077.23169   1079.53235
  1094.0    0.000914    1077.14709   1079.82776
  1073.0    0.000932    1077.06384   1080.16309
  1061.0    0.000943    1076.98035   1080.53333
  1036.0    0.000965    1076.89734   1080.93323
  1028.0    0.000973    1076.81458   1081.35437
  1024.0    0.000977    1076.73291   1081.78784
  1078.0    0.000928    1076.65027   1082.21948
  1064.0    0.000940    1076.56909   1082.63818
  1118.0    0.000894    1076.48706   1083.02820
  1033.0    0.000968    1076.40552   1083.37695
  1119.0    0.000894    1076.32446   1083.67310
  1092.0    0.000916    1076.24341   1083.90417
  1017.0    0.000983    1076.16296   1084.06287
  1101.0    0.000908    1076.08264   1084.14209
  1021.0    0.000979    1076.00208   1084.20789
  1077.0    0.000929    1075.92261   1084.12854
  1153.0    0.000867    1075.84314   1083.97266
  1095.0    0.000913    1075.76343   1083.74756
  1131.0    0.000884    1075.68506   1083.46375
  1155.0    0.000866    1075.60596   1083.12891
  1065.0    0.000939    1075.52759   1082.75391
  1049.0    0.000953    1075.44958   1082.34595
  1076.0    0.000929    1075.37122   1081.91174
  983.0     0.001017    1075.29321   1081.45813
  1054.0    0.000949    1075.21594   1080.99084
  1102.0    0.000907    1075.13818   1080.54919
  1037.0    0.000964    1075.06152   1080.07434
  1027.0    0.000974    1074.98462   1079.60486
  1085.0    0.000922    1074.90771   1079.14905
  1099.0    0.000910    1074.83191   1078.71619
  1050.0    0.000952    1074.75562   1078.31506
  1054.0    0.000949    1074.67944   1077.95520
  1124.0    0.000890    1074.60461   1077.64905
  1102.0    0.000907    1074.52881   1077.41052
  1128.0    0.000887    1074.45374   1077.26685
  1077.0    0.000929    1074.37903   1077.26343
  1091.0    0.000917    1074.30396   1077.47388
  1098.0    0.000911    1074.22961   1078.00647
  1080.0    0.000926    1074.15601   1078.97742
  1079.0    0.000927    1074.08142   1080.40930
  1036.0    0.000965    1074.00781   1081.92358
  1066.0    0.000938    1073.93420   1082.42737
  1075.0    0.000930    1073.86108   1081.28821
  1069.0    0.000935    1073.78845   1079.44714
  1084.0    0.000923    1073.71533   1077.84888
  1010.0    0.000990    1073.64258   1076.73865
  1109.0    0.000902    1073.57043   1076.07007
  1112.0    0.000899    1073.49817   1076.38623
  1037.0    0.000964    1073.42603   1076.42346
  1063.0    0.000941    1073.35474   1076.76184
  1130.0    0.000885    1073.28271   1077.38574
  1081.0    0.000925    1073.21143   1078.13110
  1035.0    0.000966    1073.14026   1078.48608
  1106.0    0.000904    1073.06958   1078.03760
  1042.0    0.000960    1072.99890   1077.14465
  1131.0    0.000884    1072.92810   1076.36475
  1075.0    0.000930    1072.85791   1075.83264
  1012.0    0.000988    1072.78845   1075.53076
  1092.0    0.000916    1072.71814   1075.71265
  1023.0    0.000978    1072.64868   1075.69885
  1089.0    0.000918    1072.57922   1075.84192
  1092.0    0.000916    1072.51001   1076.09192
  1060.0    0.000943    1072.44104   1076.46106
  1086.0    0.000921    1072.37256   1076.97815
  1080.0    0.000926    1072.30298   1077.69006
  1096.0    0.000912    1072.23523   1078.67078
  1057.0    0.000946    1072.16711   1080.08850
  1088.0    0.000919    1072.09888   1082.20215
  1100.0    0.000909    1072.03113   1085.49304
  1070.0    0.000935    1071.96338   1090.72449
  1032.0    0.000969    1071.89575   1098.82092
  1106.0    0.000904    1071.82898   1110.82837
  1118.0    0.000894    1071.76160   1126.00330
  1076.0    0.000929    1071.69495   1138.68909
  1070.0    0.000935    1071.62817   1138.91980
  1045.0    0.000957    1071.56104   1126.69287
  1088.0    0.000919    1071.49512   1112.02258
  1085.0    0.000922    1071.42859   1100.65942
  1101.0    0.000908    1071.36292   1093.39001
  1083.0    0.000923    1071.29724   1089.51428
  1080.0    0.000926    1071.23145   1088.43726
  1031.0    0.000970    1071.16577   1089.83179
  1068.0    0.000936    1071.10120   1093.70227
  1118.0    0.000894    1071.03540   1099.77844
  1083.0    0.000923    1070.97070   1105.96997
  1053.0    0.000950    1070.90637   1107.36157
  1066.0    0.000938    1070.84119   1101.89063
  1126.0    0.000888    1070.77686   1093.89795
  1055.0    0.000948    1070.71277   1087.07983
  1092.0    0.000916    1070.64832   1082.23242
  1123.0    0.000890    1070.58496   1079.01831
  1087.0    0.000920    1070.52100   1076.91956
  1055.0    0.000948    1070.45703   1075.51453
  1105.0    0.000905    1070.39404   1074.52490
  1111.0    0.000900    1070.33044   1073.78687
  1004.0    0.000996    1070.26697   1073.21106
  1076.0    0.000929    1070.20435   1072.74744
  1054.0    0.000949    1070.14148   1072.36365
  1041.0    0.000961    1070.07861   1072.03931
  1070.0    0.000935    1070.01624   1071.76123
  1059.0    0.000944    1069.95337   1070.88538
  1114.0    0.000898    1069.89185   1070.71521
  1020.0    0.000980    1069.82959   1070.56250
  1066.0    0.000938    1069.76733   1070.42358
  1022.0    0.000978    1069.70557   1070.29639
  1064.0    0.000940    1069.64429   1070.17871
  1064.0    0.000940    1069.58215   1070.06812
  1031.0    0.000970    1069.52148   1069.96509
  1053.0    0.000950    1069.46008   1069.86646
  1085.0    0.000922    1069.39893   1071.38574
  1072.0    0.000933    1069.33813   1071.42139
  1056.0    0.000947    1069.27686   1071.47510
  1026.0    0.000975    1069.21631   1071.25159
  1061.0    0.000943    1069.15613   1071.37061
  1107.0    0.000903    1069.09546   1071.51355
  1003.0    0.000997    1069.03503   1071.68701
  1025.0    0.000976    1068.97510   1071.89575
  1056.0    0.000947    1068.91443   1072.14612
  1017.0    0.000983    1068.85522   1072.45007
  1045.0    0.000957    1068.79541   1072.81738
  1060.0    0.000943    1068.73560   1073.26501
  1059.0    0.000944    1068.67603   1074.64734
  1006.0    0.000994    1068.61646   1075.39172
  1034.0    0.000967    1068.55701   1076.31250
  1050.0    0.000952    1068.49817   1077.46533
  1064.0    0.000940    1068.43848   1078.92859
  1076.0    0.000929    1068.37988   1080.82190
  1028.0    0.000973    1068.32043   1083.32971
  1103.0    0.000907    1068.26160   1086.76831
  1117.0    0.000895    1068.20337   1091.70691
  1058.0    0.000945    1068.14490   1099.15894
  1028.0    0.000973    1068.08594   1110.79248
  1070.0    0.000935    1068.02820   1128.95178
  1012.0    0.000988    1067.96936   1156.11194
  1042.0    0.000960    1067.91113   1192.60999
  1063.0    0.000941    1067.85339   1229.69263
  1049.0    0.000953    1067.79492   1243.66492
  1067.0    0.000937    1067.73718   1221.73755
  992.0     0.001008    1067.68005   1184.38342
  1074.0    0.000931    1067.62183   1151.90894
  1024.0    0.000977    1067.56421   1129.67810
  1064.0    0.000940    1067.50684   1116.69421
  1079.0    0.000927    1067.44885   1111.05530
  1090.0    0.000917    1067.39209   1111.58875
  1020.0    0.000980    1067.33472   1118.07947
  1007.0    0.000993    1067.27759   1130.61926
  1074.0    0.000931    1067.22070   1147.36328
  1059.0    0.000944    1067.16382   1159.98218
  1092.0    0.000916    1067.10632   1156.42834
  1086.0    0.000921    1067.04993   1138.71948
  1018.0    0.000982    1066.99268   1119.14050
  1099.0    0.000910    1066.93628   1103.84387
  1073.0    0.000932    1066.87903   1093.39014
  1024.0    0.000977    1066.82251   1086.48401
  1046.0    0.000956    1066.76611   1081.96838
  1015.0    0.000985    1066.70996   1078.94226
  1061.0    0.000943    1066.65283   1077.11670
  1102.0    0.000907    1066.59729   1075.53027
  1060.0    0.000943    1066.54089   1074.30994
  1058.0    0.000945    1066.48474   1073.44592
  1138.0    0.000879    1066.42834   1072.68237
  1082.0    0.000924    1066.37195   1072.06653
  1044.0    0.000958    1066.31616   1071.56836
  1056.0    0.000947    1066.26050   1069.58582
  1012.0    0.000988    1066.20410   1069.37256
  1036.0    0.000965    1066.14844   1069.22168
  1027.0    0.000974    1066.09241   1069.12805
  1164.0    0.000859    1066.03638   1069.09094
  1109.0    0.000902    1065.98108   1069.11633
  1039.0    0.000962    1065.92542   1069.25073
  1030.0    0.000971    1065.86951   1069.43018
  1038.0    0.000963    1065.81384   1069.71838
  1049.0    0.000953    1065.75818   1070.15796
  1061.0    0.000943    1065.70251   1070.82178
  1059.0    0.000944    1065.64722   1071.01123
  1071.0    0.000934    1065.59131   1072.61060
  1033.0    0.000968    1065.53601   1075.00549
  1064.0    0.000940    1065.48059   1078.49304
  1044.0    0.000958    1065.42517   1083.14014
  1055.0    0.000948    1065.36987   1088.38940
  1001.0    0.000999    1065.31458   1093.79395
  1001.0    0.000999    1065.25916   1099.68469
  1069.0    0.000935    1065.20398   1104.04871
  1053.0    0.000950    1065.14868   1102.47668
  1069.0    0.000935    1065.09338   1095.43420
  1105.0    0.000905    1065.03833   1087.74207
  1072.0    0.000933    1064.98267   1082.00635
  1045.0    0.000957    1064.92749   1078.54626
  1060.0    0.000943    1064.87244   1077.02698
  998.0     0.001002    1064.81689   1077.07068
  1002.0    0.000998    1064.76184   1078.35754
  1038.0    0.000963    1064.70654   1080.08496
  1049.0    0.000953    1064.65125   1082.14832
  1022.0    0.000978    1064.59631   1084.50220
  1046.0    0.000956    1064.54089   1085.58325
  1074.0    0.000931    1064.48584   1083.45947
  996.0     0.001004    1064.43066   1079.26392
  1043.0    0.000959    1064.37512   1075.24255
  1045.0    0.000957    1064.32031   1072.23181
  1049.0    0.000953    1064.26550   1070.17737
  1089.0    0.000918    1064.20935   1068.81970
  1029.0    0.000972    1064.15454   1067.92004
  1102.0    0.000907    1064.09888   1067.36060
  994.0     0.001006    1064.04346   1066.92786
  1039.0    0.000962    1063.98853   1066.61707
  1058.0    0.000945    1063.93286   1066.39478
  1048.0    0.000954    1063.87756   1066.16589
  1035.0    0.000966    1063.82263   1066.08569
  1001.0    0.000999    1063.76709   1066.06299
  1026.0    0.000975    1063.71167   1066.09924
  1114.0    0.000898    1063.65649   1066.19568
  1078.0    0.000928    1063.60034   1066.35486
  1023.0    0.000978    1063.54480   1066.58301
  1025.0    0.000976    1063.48975   1066.88660
  1097.0    0.000912    1063.43359   1067.27100
  1076.0    0.000929    1063.37842   1067.74915
  999.0     0.001001    1063.32239   1068.33203
  1046.0    0.000956    1063.26672   1069.04309
  1017.0    0.000983    1063.21130   1069.69495
  1084.0    0.000923    1063.15527   1070.82861
  1062.0    0.000942    1063.09961   1072.33643
  1087.0    0.000920    1063.04407   1074.42383
  1097.0    0.000912    1062.98779   1077.35229
  989.0     0.001011    1062.93152   1081.32813
  1081.0    0.000925    1062.87598   1086.07190
  1035.0    0.000966    1062.81921   1089.85596
  1069.0    0.000935    1062.76331   1089.92883
  1036.0    0.000965    1062.70728   1086.44629
  1060.0    0.000943    1062.65063   1082.20007
  1106.0    0.000904    1062.59485   1078.79016
  1023.0    0.000978    1062.53833   1076.35901
  1049.0    0.000953    1062.48132   1074.92041
  1127.0    0.000887    1062.42554   1074.18970
  1133.0    0.000883    1062.36865   1074.07361
  1051.0    0.000951    1062.31189   1074.58118
  1053.0    0.000950    1062.25513   1075.89709
  1028.0    0.000973    1062.19812   1077.48254
  1073.0    0.000932    1062.14160   1078.52930
  1041.0    0.000961    1062.08435   1077.70984
  1058.0    0.000945    1062.02698   1075.29297
  1070.0    0.000935    1061.97021   1073.49097
  1101.0    0.000908    1061.91309   1071.35413
  1032.0    0.000969    1061.85510   1069.75488
  1057.0    0.000946    1061.79846   1068.57764
  1067.0    0.000937    1061.74036   1067.68909
  1120.0    0.000893    1061.68286   1066.99353
  1121.0    0.000892    1061.62512   1066.42822
  1072.0    0.000933    1061.56775   1066.03894
  1104.0    0.000906    1061.50977   1067.30396
  1073.0    0.000932    1061.45215   1067.03821
  1029.0    0.000972    1061.39307   1066.83276
  1050.0    0.000952    1061.33533   1066.68604
  1085.0    0.000922    1061.27698   1067.00647
  1114.0    0.000898    1061.21838   1066.97961
  1047.0    0.000955    1061.15991   1067.00415
  1109.0    0.000902    1061.10107   1067.08008
  1090.0    0.000917    1061.04224   1067.20825
  1109.0    0.000902    1060.98401   1067.39343
  1082.0    0.000924    1060.92456   1067.63904
  1110.0    0.000901    1060.86536   1067.95605
  1078.0    0.000928    1060.80652   1069.17896
  1172.0    0.000853    1060.74658   1069.72046
  1134.0    0.000882    1060.68738   1070.41370
  1037.0    0.000964    1060.62793   1071.32727
  1071.0    0.000934    1060.56787   1072.58386
  1127.0    0.000887    1060.50793   1074.39319
  1069.0    0.000935    1060.44812   1077.06995
  1131.0    0.000884    1060.38757   1081.01099
  1024.0    0.000977    1060.32776   1086.53101
  1125.0    0.000889    1060.26709   1093.25269
  1139.0    0.000878    1060.20679   1098.76685
  1101.0    0.000908    1060.14600   1099.26025
  1154.0    0.000867    1060.08496   1094.98267
  1196.0    0.000836    1060.02356   1089.86975
  1155.0    0.000866    1059.96277   1086.21570
  1142.0    0.000876    1059.90063   1084.39905
  1121.0    0.000892    1059.83972   1084.22009
  1226.0    0.000816    1059.77771   1085.46729
  1159.0    0.000863    1059.71606   1088.08374
  1206.0    0.000829    1059.65454   1092.17688
  1170.0    0.000855    1059.59204   1097.91980
  1203.0    0.000831    1059.52966   1105.25232
  1160.0    0.000862    1059.46741   1113.21045
  1221.0    0.000819    1059.40479   1119.96545
  1182.0    0.000846    1059.34204   1125.59302
  1248.0    0.000801    1059.27917   1132.08545
  1231.0    0.000812    1059.21570   1140.80359
  1236.0    0.000809    1059.15259   1152.07129
  1259.0    0.000794    1059.08936   1165.82056
  1331.0    0.000751    1059.02502   1181.89063
  1234.0    0.000810    1058.96118   1200.10010
  1244.0    0.000804    1058.89722   1220.24060
  1290.0    0.000775    1058.83289   1242.05420
  1317.0    0.000759    1058.76892   1265.21021
  1333.0    0.000750    1058.70374   1289.28687
  1439.0    0.000695    1058.63928   1313.71692
  1411.0    0.000709    1058.57434   1338.10229
  1424.0    0.000702    1058.50867   1361.83398
  1474.0    0.000678    1058.44324   1384.42212
  1380.0    0.000725    1058.37830   1405.43848
  1378.0    0.000726    1058.31177   1424.48474
  1459.0    0.000685    1058.24585   1441.15198
  1434.0    0.000697    1058.18005   1454.98291
  1415.0    0.000707    1058.11304   1465.48596
  1514.0    0.000661    1058.04675   1472.20850
  1393.0    0.000718    1057.97998   1474.83521
  1464.0    0.000683    1057.91235   1473.12415
  1434.0    0.000697    1057.84583   1467.60620
  1393.0    0.000718    1057.77771   1458.53955
  1411.0    0.000709    1057.71008   1446.50916
  1381.0    0.000724    1057.64246   1432.15833
  1457.0    0.000686    1057.57373   1416.10559
  1404.0    0.000712    1057.50525   1398.89124
  1392.0    0.000718    1057.43726   1380.93018
  1357.0    0.000737    1057.36780   1362.49255
  1291.0    0.000775    1057.29858   1343.71655
  1336.0    0.000749    1057.22937   1324.64331
  1358.0    0.000736    1057.15955   1305.28821
  1388.0    0.000720    1057.09045   1285.70923
  1251.0    0.000799    1057.01990   1266.04150
  1343.0    0.000745    1056.94922   1246.50757
  1241.0    0.000806    1056.87891   1227.37781
  1326.0    0.000754    1056.80811   1208.92566
  1272.0    0.000786    1056.73669   1191.39539
  1293.0    0.000773    1056.66565   1174.98047
  1224.0    0.000817    1056.59338   1159.81836
  1229.0    0.000814    1056.52234   1145.99927
  1265.0    0.000791    1056.44958   1133.56226
  1167.0    0.000857    1056.37708   1122.54309
  1220.0    0.000820    1056.30481   1112.84448
  1253.0    0.000798    1056.23157   1104.43494
  1188.0    0.000842    1056.15808   1097.78052
  1218.0    0.000821    1056.08545   1091.70691
  1224.0    0.000817    1056.01135   1086.61877
  1136.0    0.000880    1055.93750   1082.39856
  1202.0    0.000832    1055.86316   1078.92529
  1158.0    0.000864    1055.78784   1076.08374
  1143.0    0.000875    1055.71350   1073.77039
  1167.0    0.000857    1055.63855   1071.88843
  1128.0    0.000887    1055.56238   1070.35559
  1156.0    0.000865    1055.48718   1069.10449
  1164.0    0.000859    1055.41064   1068.09277
  1121.0    0.000892    1055.33423   1067.24365
  1207.0    0.000829    1055.25830   1066.53784
  1235.0    0.000810    1055.18079   1066.23157
  1130.0    0.000885    1055.10400   1065.75513
  1135.0    0.000881    1055.02661   1065.36340
  1173.0    0.000853    1054.94836   1065.04846
  1079.0    0.000927    1054.87048   1064.80554
  1124.0    0.000890    1054.79236   1064.63635
  1118.0    0.000894    1054.71265   1064.54248
  1099.0    0.000910    1054.63379   1064.53296
  1159.0    0.000863    1054.55432   1064.62012
  1084.0    0.000923    1054.47449   1064.82214
  1075.0    0.000930    1054.39453   1064.31482
  1104.0    0.000906    1054.31372   1064.86914
  1068.0    0.000936    1054.23328   1065.66394
  1151.0    0.000869    1054.15259   1066.79321
  1066.0    0.000938    1054.07104   1068.40869
  1129.0    0.000886    1053.98975   1070.77112
  1138.0    0.000879    1053.90759   1074.31555
  1135.0    0.000881    1053.82471   1079.73352
  1105.0    0.000905    1053.74231   1086.34680
  1145.0    0.000873    1053.65955   1098.47314
  1100.0    0.000909    1053.57544   1114.79529
  1057.0    0.000946    1053.49219   1134.07422
  1037.0    0.000964    1053.40796   1149.95166
  1134.0    0.000882    1053.32336   1151.62427
  1116.0    0.000896    1053.23877   1136.54858
  1057.0    0.000946    1053.15356   1116.35657
  1062.0    0.000942    1053.06812   1099.62622
  1042.0    0.000960    1052.98218   1088.19873
  1092.0    0.000916    1052.89600   1081.34106
  1078.0    0.000928    1052.80908   1078.08386
  1108.0    0.000903    1052.72253   1076.96997
  1050.0    0.000952    1052.63477   1079.47278
  1055.0    0.000948    1052.54712   1084.69031
  1055.0    0.000948    1052.45886   1092.97681
  1190.0    0.000840    1052.37048   1101.32849
  1092.0    0.000916    1052.28174   1105.66394
  1109.0    0.000902    1052.19263   1101.19653
  1098.0    0.000911    1052.10242   1090.98828
  1048.0    0.000954    1052.01294   1081.50793
  1062.0    0.000942    1051.92236   1073.78430
  1069.0    0.000935    1051.83167   1068.46387
  1054.0    0.000949    1051.74084   1064.93140
  1027.0    0.000974    1051.64868   1062.60046
  1082.0    0.000924    1051.55688   1061.03406
  1101.0    0.000908    1051.46472   1059.94934
  1055.0    0.000948    1051.37122   1059.18054
  1113.0    0.000898    1051.27881   1059.00269
  1110.0    0.000901    1051.18494   1058.64978
  1080.0    0.000926    1051.09033   1058.46313
  1104.0    0.000906    1050.99658   1058.37366
  1067.0    0.000937    1050.90149   1058.71777
  1059.0    0.000944    1050.80615   1058.86914
  1118.0    0.000894    1050.71069   1059.13721
  1114.0    0.000898    1050.61438   1059.53320
  1086.0    0.000921    1050.51807   1060.10193
  1078.0    0.000928    1050.42139   1060.81860
  1110.0    0.000901    1050.32336   1061.71423
  1086.0    0.000921    1050.22534   1062.91321
  1137.0    0.000880    1050.12756   1063.90076
  1139.0    0.000878    1050.02856   1065.94800
  1049.0    0.000953    1049.92957   1068.65100
  1031.0    0.000970    1049.82996   1072.32166
  1121.0    0.000892    1049.72986   1077.49194
  1054.0    0.000949    1049.63000   1085.03186
  1026.0    0.000975    1049.52893   1096.24622
  1120.0    0.000893    1049.42737   1112.83105
  1059.0    0.000944    1049.32581   1136.36401
  1066.0    0.000938    1049.22314   1166.30835
  1101.0    0.000908    1049.12048   1195.05078
  1122.0    0.000891    1049.01746   1208.49500
  1070.0    0.000935    1048.91333   1205.95129
  1063.0    0.000941    1048.80945   1201.81116
  1090.0    0.000917    1048.70532   1205.08801
  1015.0    0.000985    1048.59949   1207.18066
  1100.0    0.000909    1048.49475   1194.68762
  1024.0    0.000977    1048.38843   1170.75940
  1109.0    0.000902    1048.28174   1148.51050
  1115.0    0.000897    1048.17529   1134.49182
  1078.0    0.000928    1048.06763   1129.60132
  1095.0    0.000913    1047.95923   1132.92200
  1098.0    0.000911    1047.85144   1141.98767
  1058.0    0.000945    1047.74182   1150.43176
  1074.0    0.000931    1047.63245   1151.39050
  1048.0    0.000954    1047.52271   1146.62329
  1050.0    0.000952    1047.41199   1143.77893
  1145.0    0.000873    1047.30151   1144.45862
  1096.0    0.000912    1047.18982   1142.77710
  1057.0    0.000946    1047.07776   1133.36292
  1050.0    0.000952    1046.96606   1119.84863
  1104.0    0.000906    1046.85242   1107.73755
  1116.0    0.000896    1046.73914   1098.34900
  1023.0    0.000978    1046.62573   1091.03552
  1006.0    0.000994    1046.51050   1085.43628
  1111.0    0.000900    1046.39563   1081.37048
  1054.0    0.000949    1046.28052   1078.44849
  1085.0    0.000922    1046.16394   1076.41101
  1120.0    0.000893    1046.04761   1075.10120
  1062.0    0.000942    1045.93079   1074.49512
  1017.0    0.000983    1045.81250   1074.71619
  1050.0    0.000952    1045.69482   1076.06226
  1012.0    0.000988    1045.57605   1079.03394
  1080.0    0.000926    1045.45703   1084.30994
  1023.0    0.000978    1045.33728   1092.52637
  1068.0    0.000936    1045.21643   1103.71582
  1125.0    0.000889    1045.09570   1115.87439
  1112.0    0.000899    1044.97461   1122.60242
  1061.0    0.000943    1044.85168   1117.47278
  1018.0    0.000982    1044.72974   1104.21045
  1060.0    0.000943    1044.60669   1090.71631
  1052.0    0.000951    1044.48242   1080.46582
  1117.0    0.000895    1044.35852   1073.72644
  1117.0    0.000895    1044.23352   1069.94214
  1081.0    0.000925    1044.10803   1068.62476
  1116.0    0.000896    1043.98267   1069.56409
  1063.0    0.000941    1043.85571   1072.70166
  1037.0    0.000964    1043.72876   1077.64075
  1118.0    0.000894    1043.60107   1083.10046
  1078.0    0.000928    1043.47241   1087.28137
  1013.0    0.000987    1043.34363   1087.64929
  1089.0    0.000918    1043.21472   1082.33447
  1045.0    0.000957    1043.08423   1073.97998
  1054.0    0.000949    1042.95361   1066.26270
  1075.0    0.000930    1042.82288   1060.49084
  1055.0    0.000948    1042.69043   1056.56213
  1075.0    0.000930    1042.55847   1054.05859
  1057.0    0.000946    1042.42578   1052.60901
  1104.0    0.000906    1042.29163   1051.95227
  1081.0    0.000925    1042.15771   1051.85986
  1115.0    0.000897    1042.02246   1051.90710
  1077.0    0.000929    1041.88721   1051.40466
  1066.0    0.000938    1041.75146   1050.10498
  1087.0    0.000920    1041.61389   1048.53003
  1065.0    0.000939    1041.47705   1047.14307
  1056.0    0.000947    1041.33911   1046.05322
  1069.0    0.000935    1041.20020   1045.21814
  976.0     0.001025    1041.06152   1044.53601
  1002.0    0.000998    1040.92163   1044.01550
  1087.0    0.000920    1040.78125   1043.57800
  1091.0    0.000917    1040.64038   1043.19739
  1049.0    0.000953    1040.49829   1042.85583
  1075.0    0.000930    1040.35620   1042.54395
  1037.0    0.000964    1040.21326   1042.06226
  1086.0    0.000921    1040.06909   1041.79431
  1014.0    0.000986    1039.92505   1041.54138
  1073.0    0.000932    1039.78040   1041.30029
  1061.0    0.000943    1039.63428   1041.06702
  1070.0    0.000935    1039.48853   1040.84314
  1084.0    0.000923    1039.34155   1040.99805
  1012.0    0.000988    1039.19348   1040.58569
  1009.0    0.000991    1039.04578   1040.40894
  1039.0    0.000962    1038.89636   1040.23621
  1044.0    0.000958    1038.74670   1040.07104
  1035.0    0.000966    1038.59680   1039.91089
  1001.0    0.000999    1038.44568   1039.65808
  1049.0    0.000953    1038.29395   1039.51233
  1010.0    0.000990    1038.14209   1039.37183
  1038.0    0.000963    1037.98840   1039.23682
  1077.0    0.000929    1037.83496   1039.10962
  1039.0    0.000962    1037.68054   1038.98877
  1075.0    0.000930    1037.52515   1038.87646
  1073.0    0.000932    1037.36987   1038.95801
  991.0     0.001009    1037.21411   1038.43042
  1056.0    0.000947    1037.05554   1038.37756
  1052.0    0.000951    1036.89832   1038.34094
  1013.0    0.000987    1036.74048   1038.29102
  1111.0    0.000900    1036.58057   1038.29541
  995.0     0.001005    1036.42053   1038.32666
  1078.0    0.000928    1036.25952   1038.39087
  1027.0    0.000974    1036.09863   1038.49829
  1038.0    0.000963    1035.93640   1038.65894
  1008.0    0.000992    1035.77307   1039.46606
  1049.0    0.000953    1035.60974   1039.82166
  1001.0    0.000999    1035.44446   1040.30273
  1085.0    0.000922    1035.28015   1040.95911
  1037.0    0.000964    1035.11462   1041.86560
  1024.0    0.000977    1034.94714   1043.14758
  1011.0    0.000989    1034.78088   1045.02502
  1008.0    0.000992    1034.61316   1047.85071
  1056.0    0.000947    1034.44312   1052.15967
  977.0     0.001024    1034.27454   1058.64929
  1068.0    0.000936    1034.10461   1067.96667
  1067.0    0.000937    1033.93335   1079.92029
  1065.0    0.000939    1033.76123   1091.37073
  1041.0    0.000961    1033.58972   1095.25256
  1092.0    0.000916    1033.41553   1088.56482
  1052.0    0.000951    1033.24170   1076.61938
  1031.0    0.000970    1033.06750   1065.79736
  1038.0    0.000963    1032.89099   1057.98108
  1046.0    0.000956    1032.71521   1052.98584
  1080.0    0.000926    1032.53870   1050.20605
  1043.0    0.000959    1032.35986   1049.16101
  1027.0    0.000974    1032.18164   1049.63757
  1054.0    0.000949    1032.00146   1051.67664
  1062.0    0.000942    1031.82141   1055.46570
  1036.0    0.000965    1031.64087   1060.99365
  1018.0    0.000982    1031.45850   1067.14160
  1004.0    0.000996    1031.27612   1070.74841
  1075.0    0.000930    1031.09216   1069.66455
  1010.0    0.000990    1030.90820   1065.43005
  971.0     0.001030    1030.72363   1062.04724
  1064.0    0.000940    1030.53687   1061.34680
  1045.0    0.000957    1030.35107   1064.09900
  1081.0    0.000925    1030.16406   1070.98425
  1021.0    0.000979    1029.97485   1082.73254
  1074.0    0.000931    1029.78613   1099.32654
  1029.0    0.000972    1029.59668   1117.30481
  952.0     0.001050    1029.40552   1126.77087
  1072.0    0.000933    1029.21472   1119.40527
  1046.0    0.000956    1029.02222   1101.65283
  1016.0    0.000984    1028.82825   1083.47119
  990.0     0.001010    1028.63464   1069.62524
  1048.0    0.000954    1028.44043   1060.49622
  1047.0    0.000955    1028.24353   1054.83130
  1029.0    0.000972    1028.04810   1052.64453
  977.0     0.001024    1027.85071   1052.09290
  1034.0    0.000967    1027.65198   1053.77246
  1032.0    0.000969    1027.45349   1057.90210
  1055.0    0.000948    1027.25244   1064.63452
  1079.0    0.000927    1027.05200   1073.03796
  1027.0    0.000974    1026.85071   1079.26990
  1052.0    0.000951    1026.64758   1077.99646
  1080.0    0.000926    1026.44495   1069.86035
  1030.0    0.000971    1026.23950   1059.95386
  1021.0    0.000979    1026.03516   1051.75842
  1029.0    0.000972    1025.82959   1045.83777
  1013.0    0.000987    1025.62170   1041.77954
  1049.0    0.000953    1025.41455   1039.38123
  1046.0    0.000956    1025.20630   1037.52966
  1116.0    0.000896    1024.99585   1036.24463
  1041.0    0.000961    1024.78638   1035.34021
  1056.0    0.000947    1024.57520   1034.70789
  1096.0    0.000912    1024.36279   1034.28979
  1046.0    0.000956    1024.14978   1034.06079
  1053.0    0.000950    1023.93640   1034.01196
  1071.0    0.000934    1023.72070   1034.14697
  1074.0    0.000931    1023.50513   1034.48438
  1075.0    0.000930    1023.28912   1035.04932
  1066.0    0.000938    1023.07043   1035.91711
  1132.0    0.000883    1022.85272   1036.75085
  1075.0    0.000930    1022.63367   1038.23413
  1066.0    0.000938    1022.41248   1040.10449
  1084.0    0.000923    1022.19183   1042.40808
  995.0     0.001005    1021.96851   1044.59753
  1125.0    0.000889    1021.74622   1047.90332
  1046.0    0.000956    1021.52264   1051.72754
  1104.0    0.000906    1021.29681   1056.07581
  1140.0    0.000877    1021.07111   1060.94263
  1149.0    0.000870    1020.84357   1066.30029
  1101.0    0.000908    1020.61621   1072.10925
  1135.0    0.000881    1020.38788   1078.30640
  1114.0    0.000898    1020.15710   1084.81104
  1122.0    0.000891    1019.92725   1091.55347
  1154.0    0.000867    1019.69611   1098.39075
  1139.0    0.000878    1019.46259   1105.26318
  1160.0    0.000862    1019.22974   1112.13928
  1110.0    0.000901    1018.99591   1118.90833
  1081.0    0.000925    1018.75934   1125.97363
  1187.0    0.000842    1018.52356   1133.30798
  1188.0    0.000842    1018.28650   1141.03882
  1198.0    0.000835    1018.04712   1149.23962
  1217.0    0.000822    1017.80835   1157.89832
  1173.0    0.000853    1017.56854   1166.88867
  1193.0    0.000838    1017.32660   1175.97559
  1159.0    0.000863    1017.08508   1184.91113
  1184.0    0.000845    1016.84204   1193.15198
  1177.0    0.000850    1016.59723   1200.35986
  1216.0    0.000822    1016.35223   1206.14380
  1164.0    0.000859    1016.10529   1210.15710
  1162.0    0.000861    1015.85852   1212.14026
  1151.0    0.000869    1015.61047   1212.04663
  1132.0    0.000883    1015.36047   1209.70276
  1169.0    0.000855    1015.11041   1205.40027
  1112.0    0.000899    1014.85870   1199.49243
  1164.0    0.000859    1014.60681   1192.42957
  1176.0    0.000850    1014.35388   1184.66809
  1097.0    0.000912    1014.09882   1176.60413
  1128.0    0.000887    1013.84406   1168.53833
  1179.0    0.000848    1013.58807   1160.69885
  1098.0    0.000911    1013.32959   1153.10400
  1159.0    0.000863    1013.07184   1145.81799
  1108.0    0.000903    1012.81281   1138.81128
  1126.0    0.000888    1012.55139   1132.02124
  1068.0    0.000936    1012.29053   1125.37769
  1118.0    0.000894    1012.02802   1118.84387
  997.0     0.001003    1011.76355   1112.43237
  1083.0    0.000923    1011.49915   1106.30298
  1117.0    0.000895    1011.23401   1100.73608
  1097.0    0.000912    1010.96643   1096.11194
  1052.0    0.000951    1010.69897   1092.79614
  1006.0    0.000994    1010.43042   1090.77710
  1029.0    0.000972    1010.15979   1088.84363
  1046.0    0.000956    1009.88904   1084.38440
  1074.0    0.000931    1009.61652   1076.40149
  1119.0    0.000894    1009.34357   1067.27014
  1042.0    0.000960    1009.06940   1059.35950
  1031.0    0.000970    1008.79327   1053.48987
  1139.0    0.000878    1008.51721   1049.68738
  1052.0    0.000951    1008.23895   1047.62769
  1059.0    0.000944    1007.96094   1046.44824
  1065.0    0.000939    1007.68158   1044.69812
  1051.0    0.000951    1007.39990   1041.83386
  998.0     0.001002    1007.11859   1039.04578
  1001.0    0.000999    1006.83569   1037.48523
  1079.0    0.000927    1006.55090   1037.23987
  1018.0    0.000982    1006.26611   1037.19482
  1047.0    0.000955    1005.98010   1035.54675
  1105.0    0.000905    1005.69214   1032.00000
  1029.0    0.000972    1005.40369   1028.04395
  1046.0    0.000956    1005.11469   1024.80896
  1033.0    0.000968    1004.82306   1022.57440
  1066.0    0.000938    1004.53131   1021.26288
  1011.0    0.000989    1004.23883   1020.26990
  1027.0    0.000974    1003.94373   1019.74573
  1004.0    0.000996    1003.64874   1018.57855
  1029.0    0.000972    1003.35284   1016.65063
  1048.0    0.000954    1003.05463   1014.57477
  1025.0    0.000976    1002.75610   1012.83777
  1048.0    0.000954    1002.45520   1011.46332
  1005.0    0.000995    1002.15460   1010.33411
  1010.0    0.000990    1001.85272   1009.22845
  1005.0    0.000995    1001.54895   1008.07574
  1001.0    0.000999    1001.24469   1006.63068
  1025.0    0.000976    1000.93817   1005.67236
  1046.0    0.000956    1000.63159   1004.84497
  1006.0    0.000994    1000.32404   1003.94647
  976.0     0.001025    1000.01385   1003.31177
  1024.0    0.000977    999.70410    1002.73822
  968.0     0.001033    999.39325    1001.53491
  987.0     0.001013    999.07953    1001.06030
  991.0     0.001009    998.76599    1000.61212
  1043.0    0.000959    998.45117    1000.19617
  995.0     0.001005    998.13428    999.78241
  998.0     0.001002    997.81714    999.38251
  987.0     0.001013    997.49921    998.99274
  975.0     0.001026    997.17816    998.61035
  1011.0    0.000989    996.85754    998.06519
  1018.0    0.000982    996.53552    997.70520
  1040.0    0.000962    996.21106    997.35095
  1051.0    0.000951    995.88727    997.00494
  1035.0    0.000966    995.56158    996.66589
  968.0     0.001033    995.23370    995.98993
  978.0     0.001022    994.90576    995.68213
  983.0     0.001017    994.57532    995.38635
  1061.0    0.000943    994.24518    995.11078
  1026.0    0.000975    993.91321    994.86279
  1081.0    0.000925    993.57922    994.65747
  979.0     0.001021    993.24481    994.52051
  1032.0    0.000969    992.90839    994.48499
  978.0     0.001022    992.57166    994.66144
  959.0     0.001043    992.23407    994.95178
  1002.0    0.000998    991.89392    995.37811
  1011.0    0.000989    991.55353    995.65411
  982.0     0.001018    991.21198    995.43701
  985.0     0.001015    990.86780    994.57959
  1033.0    0.000968    990.52374    993.47809
  1010.0    0.000990    990.17816    992.46527
  983.0     0.001017    989.83044    991.63354
  1024.0    0.000977    989.48279    990.96912
  1012.0    0.000988    989.13354    990.47345
  982.0     0.001018    988.78168    990.03729
  1004.0    0.000996    988.42993    989.68585
  1054.0    0.000949    988.07733    989.41693
  1065.0    0.000939    987.72144    989.37054
  990.0     0.001010    987.36560    989.30328
  977.0     0.001024    987.00897    989.31793
  949.0     0.001054    986.64984    989.15668
  1048.0    0.000954    986.29034    988.88855
  973.0     0.001028    985.92792    988.30750
  1030.0    0.000971    985.56610    987.60522
  1050.0    0.000952    985.20239    986.95056
  1016.0    0.000984    984.83636    986.39429
  1028.0    0.000973    984.47040    985.93420
  1016.0    0.000984    984.10175    985.55219
  1039.0    0.000962    983.73334    985.25854
  971.0     0.001030    983.36304    985.00745
  1029.0    0.000972    982.99042    984.82550
  1003.0    0.000997    982.61780    984.78656
  992.0     0.001008    982.24396    984.83331
  1018.0    0.000982    981.86743    985.07843
  1035.0    0.000966    981.49103    985.61493
  973.0     0.001028    981.11285    986.54254
  1012.0    0.000988    980.73218    987.91278
  1010.0    0.000990    980.35162    989.52917
  957.0     0.001045    979.96960    990.62518
  955.0     0.001047    979.58514    990.24152
  924.0     0.001082    979.19983    988.55615
  908.0     0.001101    978.81390    986.62115
  1003.0    0.000997    978.42529    985.07141
  1030.0    0.000971    978.03656    984.13519
  930.0     0.001075    977.64648    983.79132
  955.0     0.001047    977.25330    984.05109
  1021.0    0.000979    976.86017    984.97528
  1037.0    0.000964    976.46484    986.61694
  996.0    .            .            .
_pd_meas_number_of_points              4000
_pd_proc_number_of_points              4000

loop_
      _refln_index_h
      _refln_index_k
      _refln_index_l
      _pd_refln_wavelength_id
      _pd_refln_phase_id
      _refln_observed_status
      _refln_F_squared_meas
      _refln_F_squared_calc
      _refln_phase_calc
      _refln_d_spacing
      _gsas_i100_meas
   1   0   0  1  2 o  24.267     118.948     0.00    6.06097   0.02 
   1   0   0  2  2 o  15.631     118.948     0.00    6.06097   0.00 
   1   0   1  1  1 o -709.526    2041.590  -135.00   5.17466   0.00 
   1   0   1  2  1 o -709.526    2041.590  -135.00   5.17466   0.00 
   0   0   2  1  2 o  15242.113  501.513    110.94   3.56787   3.18 
   0   0   2  2  2 o  28677.086  501.513    110.94   3.56787   2.97 
   1   1   0  1  2 o  18745.883  411.664    180.00   3.49930  11.26 
   1   1   0  2  2 o  19189.168  411.664    180.00   3.49930   5.73 
   1   1   2  1  1 o  183169.27  117506.15 -40.61    3.34166  100.00
   1   1   2  2  1 o  180050.27  117506.15 -40.61    3.34166  48.86 
   1   0   3  1  1 o  14451.840  2670.864   135.00   3.21429   7.87 
   1   0   3  2  1 o  14920.168  2670.864   135.00   3.21429   4.04 
   1   1   1  1  2 o  5867.899   2267.566  -176.21   3.14185   4.78 
   1   1   1  2  2 o  7674.535   2267.566  -176.21   3.14185   3.23 
   1   0   2  1  2 o  3417.120   783.133   -61.40    3.07469   2.98 
   1   0   2  2  2 o  3319.724   783.133   -61.40    3.07469   1.44 
   2   0   0  1  2 o  1827.279   58.481      0.00    3.03048   0.80 
   2   0   0  2  2 o  3441.068   58.481      0.00    3.03048   0.75 
   0   0   4  1  1 o  6317.515   1287.616    0.00    2.90020   0.66 
   0   0   4  2  1 o  5260.385   1287.616    0.00    2.90020   0.28 
   2   0   0  1  1 o  4819.935   1324.395    0.00    2.89086   1.01 
   2   0   0  2  1 o  4841.319   1324.395    0.00    2.89086   0.50 
   2   0   2  1  1 o   0.015      0.261     90.00    2.58733   0.00 
   2   0   2  2  1 o   0.015      0.261     90.00    2.58733   0.00 
   2   1   1  1  1 o -655.554    2339.314   146.98   2.52374   0.00 
   2   1   1  2  1 o -655.554    2339.314   146.98   2.52374   0.00 
   1   1   2  1  2 o  3864.354   19219.670  171.52   2.49827   0.00 
   1   1   2  2  2 o  3864.354   19219.670  171.52   2.49827   0.00 
   2   0   2  1  2 o  2435.226   14908.914 -84.02    2.30975   0.00 
   2   0   2  2  2 o  2435.226   14908.914 -84.02    2.30975   0.00 
   2   1   0  1  2 o  95.317     585.264   -180.00   2.29083   0.00 
   2   1   0  2  2 o  95.317     585.264   -180.00   2.29083   0.00 
   2   1   1  1  2 o  1318.605   7906.305   94.94    2.18118   0.00 
   1   0   5  1  1 o -602.992    1925.997  -135.00   2.15326   0.00 
   2   1   3  1  1 o -517.005    1281.456  -120.02   2.14943   0.00 
   2   1   1  2  2 o  1318.605   7906.305   94.94    2.18118   0.00 
   1   0   5  2  1 o -602.992    1925.997  -135.00   2.15326   0.00 
   2   1   3  2  1 o -517.005    1281.456  -120.02   2.14943   0.00 
   2   0   4  1  1 o  294321.28  151059.47   0.00    2.04744  53.46 
   2   2   0  1  1 o  290620.63  150412.86   0.00    2.04415  26.29 
   2   0   4  2  1 o  295468.44  151059.47   0.00    2.04744  26.68 
   2   2   0  2  1 o  306267.63  150412.86   0.00    2.04415  13.79 
   3   0   0  1  2 o  122411.84  114573.53   0.00    2.02032  18.56 
   3   0   0  2  2 o  197647.59  114573.53   0.00    2.02032  15.74 
   1   1   3  1  2 o  35886.27   48621.03  -179.43   1.96716   9.67 
   1   1   3  2  2 o  33279.273  48621.03  -179.43   1.96716   4.38 
   2   1   2  1  2 o  11254.717  4740.299  -94.54    1.92768   6.49 
   2   1   2  2  2 o  11348.625  4740.299  -94.54    1.92768   3.26 
   3   0   1  1  1 o  32014.695  2446.154  -135.00   1.90119   5.11 
   3   0   1  2  1 o  41160.35   2446.154  -135.00   1.90119   3.25 
   3   1   0  1  1 o   0.044      0.708    -180.00   1.82834   0.00 
   3   1   0  2  1 o   0.044      0.708    -180.00   1.82834   0.00 
   0   0   4  1  2 o  10074.413  1258.030  -107.90   1.78394   0.42 
   0   0   4  2  2 o  22339.047  1258.030  -107.90   1.78394   0.47 
   1   1   6  1  1 o  117679.84  61336.11   40.69    1.74786  14.57 
   3   0   2  1  2 o  4341.490   1118.777   169.38   1.75804   1.13 
   3   1   2  1  1 o  99204.86   60855.75   40.55    1.74377  24.28 
   1   1   6  2  1 o  99451.59   61336.11   40.69    1.74786   6.08 
   3   0   2  2  2 o  2724.775   1118.777   169.38   1.75804   0.36 
   3   1   2  2  1 o  99161.46   60855.75   40.55    1.74377  12.06 
   2   2   0  1  2 o  90.400     73.163      0.00    1.74965   0.00 
   2   2   0  2  2 o  85.117     73.163      0.00    1.74965   0.00 
   2   1   5  1  1 o  4095.328   987.279    120.17   1.72686   1.12 
   3   0   3  1  1 o  2573.974   499.347    135.00   1.72489   0.36 
   2   1   5  2  1 o  4570.334   987.279    120.17   1.72686   0.62 
   3   0   3  2  1 o  2642.475   499.347    135.00   1.72489   0.18 
   1   0   4  1  2 o  9627.321   10243.313  101.58   1.71135   1.80 
   1   0   4  2  2 o  9361.678   10243.313  101.58   1.71135   0.87 
   2   2   1  1  2 o  219.266    485.441    46.64    1.69931   0.00 
   2   2   1  2  2 o  201.652    485.441    46.64    1.69931   0.00 
   2   2   4  1  1 o -77.044     647.678     0.00    1.67083   0.00 
   3   1   0  1  2 o   0.692      5.027      0.00    1.68101   0.00 
   2   2   4  2  1 o -77.044     647.678     0.00    1.67083   0.00 
   3   1   0  2  2 o   0.692      5.027      0.00    1.68101   0.00 
   2   1   3  1  2 o  61.051     333.333    142.43   1.65001   0.00 
   2   1   3  2  2 o  61.051     333.333    142.43   1.65001   0.00 
   3   1   1  1  2 o  676.273    3589.718  -103.29   1.63622   0.00 
   3   1   1  2  2 o  676.273    3589.718  -103.29   1.63622   0.00 
   2   0   6  1  1 o   0.010      0.147    -90.00    1.60714   0.00 
   2   0   6  2  1 o   0.010      0.147    -90.00    1.60714   0.00 
   1   0   7  1  1 o -408.873    823.278    135.00   1.59310   0.00 
   1   0   7  2  1 o -408.873    823.278    135.00   1.59310   0.00 
   3   2   1  1  1 o -336.628    502.964   -154.64   1.58846   0.00 
   3   2   1  2  1 o -336.628    502.964   -154.64   1.58846   0.00 
   1   1   4  1  2 o  306.252    1097.315  -52.21    1.58932   0.00 
   1   1   4  2  2 o  306.252    1097.315  -52.21    1.58932   0.00 
   2   2   2  1  2 o  1960.091   7863.641   174.76   1.57093   0.00 
   2   2   2  2  2 o  1960.091   7863.641   174.76   1.57093   0.00 
   3   1   4  1  1 o   0.037      0.549      0.00    1.54665   0.00 
   3   1   4  2  1 o   0.037      0.549      0.00    1.54665   0.00 
   2   0   4  1  2 o  62.584     327.896    164.96   1.53735   0.00 
   2   0   4  2  2 o  62.584     327.896    164.96   1.53735   0.00 
   3   1   2  1  2 o  27.762     138.262    60.76    1.52068   0.00 
   3   1   2  2  2 o  27.762     138.262    60.76    1.52068   0.00 
   4   0   0  1  2 o  379.418    1964.508    0.00    1.51524   0.00 
   4   0   0  2  2 o  379.418    1964.508    0.00    1.51524   0.00 
   3   0   5  1  1 o -316.712    402.789   -135.00   1.48250   0.00 
   3   2   3  1  1 o -477.581    1755.737   125.25   1.48125   0.00 
   3   0   5  2  1 o -316.712    402.789   -135.00   1.48250   0.00 
   3   2   3  2  1 o -477.581    1755.737   125.25   1.48125   0.00 
   0   0   8  1  1 o  77945.78   88279.30    0.00    1.45010   1.46 
   0   0   8  2  1 o  78411.60   88279.30    0.00    1.45010   0.73 
   4   0   0  1  1 o  79067.50   86892.28    0.00    1.44543   2.94 
   4   0   0  2  1 o  119323.23  86892.28    0.00    1.44543   2.26 
   4   0   2  1  1 o   0.127      1.829    -90.00    1.40254   0.00 
   2   2   3  1  2 o  6174.408   16196.008   1.37    1.40941   0.57 
   2   1   4  1  2 o  660.478    1611.882   103.19   1.40750   0.09 
   4   0   2  2  1 o   2.613      1.829    -90.00    1.40254   0.00 
   2   2   3  2  2 o  6837.430   16196.008   1.37    1.40941   0.33 
   2   1   4  2  2 o  1065.927   1611.882   103.19   1.40750   0.11 
   2   1   7  1  1 o  2151.412   1102.171  -146.65   1.39527   0.37 
   4   1   1  1  1 o  2704.614   840.376    107.67   1.39214   0.44 
   2   1   7  2  1 o  3715.169   1102.171  -146.65   1.39527   0.30 
   4   1   1  2  1 o  6037.610   840.376    107.67   1.39214   0.46 
   4   0   2  1  2 o  3239.669   2314.374   55.95    1.39468   0.39 
   4   0   2  2  2 o  5196.504   2314.374   55.95    1.39468   0.33 
   3   2   0  1  2 o  88.472     35.704      0.00    1.39048   0.01 
   3   2   0  2  2 o  186.974    35.704      0.00    1.39048   0.01 
   3   1   3  1  2 o  1562.879   624.707   -161.80   1.37278   0.39 
   3   1   3  2  2 o  875.755    624.707   -161.80   1.37278   0.10 
   3   2   1  1  2 o  2019.134   3035.871  -72.12    1.36481   0.37 
   3   2   1  2  2 o  6404.903   3035.871  -72.12    1.36481   0.77 
   3   0   4  1  2 o  6929.880   1088.810  -78.18    1.33724   0.87 
   3   1   6  1  1 o  56353.43   36606.28  -41.26    1.32844   7.06 
   3   0   4  2  2 o  3873.321   1088.810  -78.18    1.33724   0.24 
   3   3   2  1  1 o  47030.75   36333.32  -41.12    1.32664   2.91 
   3   1   6  2  1 o  46275.05   36606.28  -41.26    1.32844   2.86 
   3   3   2  2  1 o  50550.53   36333.32  -41.12    1.32664   1.56 
   3   2   5  1  1 o  4703.917   1421.764  -125.35   1.31916   0.66 
   4   1   3  1  1 o  4640.294   1110.015  -157.17   1.31827   0.64 
   4   1   0  1  2 o  1108.005   744.568     0.00    1.32261   0.10 
   3   2   5  2  1 o  10301.334  1421.764  -125.35   1.31916   0.69 
   1   1   5  1  2 o  4975.760   2911.644  -179.78   1.32147   0.49 
   4   1   3  2  1 o  10652.659  1110.015  -157.17   1.31827   0.71 
   4   1   0  2  2 o  1626.439   744.568     0.00    1.32261   0.08 
   1   1   5  2  2 o  6760.687   2911.644  -179.78   1.32147   0.35 
   2   0   8  1  1 o  999.392    268.002     0.00    1.29617   0.07 
   4   1   1  1  2 o  513.412    34.831    -78.72    1.30046   0.13 
   4   0   4  1  1 o  654.701    297.156     0.00    1.29367   0.04 
   2   0   8  2  1 o  589.815    268.002     0.00    1.29617   0.02 
   4   2   0  1  1 o  676.269    307.216     0.00    1.29283   0.05 
   4   1   1  2  2 o  126.146    34.831    -78.72    1.30046   0.02 
   4   0   4  2  1 o  1003.927   297.156     0.00    1.29367   0.03 
   3   2   2  1  2 o  7599.350   8002.190  -84.27    1.29557   1.40 
   4   2   0  2  1 o  1315.971   307.216     0.00    1.29283   0.04 
   3   2   2  2  2 o  9555.909   8002.190  -84.27    1.29557   0.93 
   4   2   2  1  1 o   0.060      0.819     90.00    1.26187   0.00 
   4   2   2  2  1 o   0.060      0.819     90.00    1.26187   0.00 
   1   0   9  1  1 o  3262.096   550.295   -135.00   1.25809   0.21 
   3   0   7  1  1 o  3553.911   1252.304   135.00   1.25656   0.23 
   1   0   9  2  1 o  606.663    550.295   -135.00   1.25809   0.03 
   3   0   7  2  1 o  1006.717   1252.304   135.00   1.25656   0.04 
   2   2   4  1  2 o  301.530    761.617   -69.38    1.24913   0.01 
   2   2   4  2  2 o  641.768    761.617   -69.38    1.24913   0.02 
   4   1   2  1  2 o  1593.738   3495.634   157.38   1.24014   0.12 
   4   1   2  2  2 o  1027.281   3495.634   157.38   1.24014   0.00 
   3   1   4  1  2 o  1916.027   8469.941   98.09    1.22342   0.00 
   3   1   4  2  2 o  1916.027   8469.941   98.09    1.22342   0.00 
   5   0   0  1  2 o  396.739    1709.709    0.00    1.21219   0.00 
   5   0   0  2  2 o  396.739    1709.709    0.00    1.21219   0.00 
   2   1   5  1  2 o  398.097    1745.957  -97.78    1.21132   0.00 
   2   1   5  2  2 o  398.097    1745.957  -97.78    1.21132   0.00 
   4   1   5  1  1 o -313.539    912.894    156.89   1.20011   0.00 
   4   1   5  2  1 o  1128.380   912.894    156.89   1.20011   0.08 
   3   2   3  1  2 o  234.276    1035.656  -11.80    1.20041   0.00 
   3   2   3  2  2 o  544.255    1035.656  -11.80    1.20041   0.03 
   0   0   6  1  2 o  36715.28   16805.047  166.61   1.18929   0.57 
   2   2   8  1  1 o  77787.52   54831.54    0.00    1.18273   3.80 
   0   0   6  2  2 o  39020.90   16805.047  166.61   1.18929   0.30 
   4   2   4  1  1 o  66819.52   54205.91    0.00    1.18082   6.46 
   2   2   8  2  1 o  68925.55   54831.54    0.00    1.18273   1.67 
   4   2   4  2  1 o  85851.66   54205.91    0.00    1.18082   4.19 
   1   0   6  1  2 o  1004.203   648.891   -70.80    1.16704   0.08 
   3   3   0  1  2 o  22502.256  19559.996   0.00    1.16643   0.93 
   1   0   6  2  2 o  718.238    648.891   -70.80    1.16704   0.03 
   3   3   0  2  2 o  23473.563  19559.996   0.00    1.16643   0.49 
   4   0   6  1  1 o   2.513      1.176     90.00    1.15769   0.00 
   4   0   6  2  1 o   0.746      1.176     90.00    1.15769   0.00 
   2   1   9  1  1 o  212.739    748.672    146.33   1.15358   0.05 
   3   2   7  1  1 o  29.646     287.092    153.48   1.15241   0.02 
   4   1   3  1  2 o  3900.256   6141.639  -179.05   1.15593   0.59 
   2   1   9  2  1 o  301.836    748.672    146.33   1.15358   0.03 
   4   3   1  1  1 o  521.387    1143.403   153.38   1.15064   0.08 
   5   0   1  1  1 o  -9.649     116.375   -135.00   1.15064   0.01 
   4   0   4  1  2 o  7224.429   12721.880  101.20   1.15487   0.40 
   3   2   7  2  1 o  79.928     287.092    153.48   1.15241   0.01 
   4   1   3  2  2 o  3228.076   6141.639  -179.05   1.15593   0.23 
   4   3   1  2  1 o  817.907    1143.403   153.38   1.15064   0.06 
   5   0   1  2  1 o  50.428     116.375   -135.00   1.15064   0.01 
   4   0   4  2  2 o  7779.338   12721.880  101.20   1.15487   0.23 
   3   3   1  1  2 o  336.056    531.694   -82.04    1.15116   0.02 
   3   3   1  2  2 o  333.736    531.694   -82.04    1.15116   0.01 
   5   0   2  1  2 o  5610.233   7572.847  -71.78    1.14776   0.36 
   4   2   0  1  2 o  1373.185   1197.017   180.00   1.14541   0.10 
   5   0   2  2  2 o  8487.871   7572.847  -71.78    1.14776   0.31 
   4   2   0  2  2 o  3710.591   1197.017   180.00   1.14541   0.16 
   3   1   8  1  1 o   0.653      0.280    -180.00   1.13614   0.00 
   5   1   0  1  1 o   4.713      2.491      0.00    1.13389   0.00 
   3   1   8  2  1 o   0.392      0.280    -180.00   1.13614   0.00 
   5   1   0  2  1 o   1.212      2.491      0.00    1.13389   0.00 
   4   2   1  1  2 o  2037.507   3673.896   82.46    1.13094   0.21 
   4   2   1  2  2 o  1384.394   3673.896   82.46    1.13094   0.05 
   1   1   6  1  2 o  3482.206   10983.761  17.62    1.12603   0.12 
   1   1   6  2  2 o  8170.459   10983.761  17.62    1.12603   0.27 
   1   1  10  1  1 o  35082.81   23459.104 -41.88    1.11602   1.57 
   3   3   6  1  1 o  24419.859  23119.156  41.59    1.11389   1.07 
   1   1  10  2  1 o  23003.797  23459.104 -41.88    1.11602   0.50 
   5   1   2  1  1 o  21527.061  22952.197 -41.45    1.11283   1.86 
   3   3   6  2  1 o  19584.465  23119.156  41.59    1.11389   0.42 
   5   1   2  2  1 o  20541.943  22952.197 -41.45    1.11283   0.88 
   4   3   3  1  1 o  438.989    340.416   -101.75   1.10787   0.06 
   5   0   3  1  1 o  1561.223   1269.996   135.00   1.10787   0.09 
   5   0   3  2  1 o  2671.426   1269.996   135.00   1.10787   0.07 
   4   3   3  2  1 o  814.764    340.416   -101.75   1.10787   0.05 
   3   3   2  1  2 o  2383.129   2490.624  -177.01   1.10869   0.20 
   2   0   6  1  2 o  1957.812   1536.139  -77.06    1.10709   0.14 
   3   3   2  2  2 o  4029.207   2490.624  -177.01   1.10869   0.17 
   2   2   5  1  2 o  730.213    548.049   -17.02    1.10591   0.04 
   2   0   6  2  2 o  2745.010   1536.139  -77.06    1.10709   0.11 
   2   2   5  2  2 o  908.815    548.049   -17.02    1.10591   0.03 
   3   2   4  1  2 o  1393.607   257.120   -136.28   1.09669   0.24 
   3   2   4  2  2 o  2463.138   257.120   -136.28   1.09669   0.21 
   4   2   2  1  2 o  1130.119   640.797   -126.65   1.09059   0.17 
_reflns_number_total                   223
_reflns_limit_h_min                    0
_reflns_limit_h_max                    5
_reflns_limit_k_min                    0
_reflns_limit_k_max                    3
_reflns_limit_l_min                    0
_reflns_limit_l_max                    10
_reflns_d_resolution_high              1.091
_reflns_d_resolution_low               6.061
#--eof--eof--eof--eof--eof--eof--eof--eof--eof--eof--eof--eof--eof--eof--eof--#
